# Supplementary material
Source: Royal Society of Chemistry journal article supplement (doi:10.1039/d6dt00909c)
Supplement: d6dt00909c1.pdf [file d6dt00909c1.pdf]

# Supporting information for Geometric control of Fe(I) intermediates in CO<sub>2</sub> photoreduction by tetrahedral tripodal phosphine complexes

*Marcos A. Bento,<sup>1</sup> Nuno A. G. Bandeira,<sup>2</sup> Haralampos N. Miras,<sup>3</sup> Sara Realista,<sup>1</sup> Michael Gleeson,<sup>4</sup> Edwin J. Devid,<sup>5</sup> Paula Brandão,<sup>6</sup> João Rocha,<sup>6</sup> Paulo N. Martinho<sup>1,7\*</sup>*

*Corresponding author email: [pnmartinho@ciencias.ulisboa.pt](mailto:pnmartinho@ciencias.ulisboa.pt)*

<sup>1</sup> Centro de Química Estrutural, Institute of Molecular Sciences, Departamento de Química e Bioquímica, Faculdade de Ciências, Universidade de Lisboa, Campo Grande, 1749-016 Lisboa, Portugal

<sup>2</sup> Biosystems and Integrative Sciences Institute (BioISI), Departamento de Química e Bioquímica, Faculdade de Ciências Universidade de Lisboa, 8.5.53 - C8 Campo Grande, 1749-016 Lisboa, Portugal

<sup>3</sup> School of Chemistry, The University of Glasgow, Glasgow G12 8QQ, UK

<sup>4</sup> Dutch Institute for Fundamental Energy Research (DIFFER), De Zaale 20, 5612 AJ Eindhoven, The Netherlands

<sup>5</sup> KapiteinLabs, Koepelplein 1E, 2031 WL, Haarlem, The Netherlands

<sup>6</sup> Department of Chemistry, CICECO-Aveiro Institute of Materials, University of Aveiro, 3810-193 Aveiro, Portugal

<sup>7</sup> Max Planck Institute for the Science of Light, Staudtstr. 2, 91058 Erlangen, Germany

|                                                                                                                                                    |    |
|----------------------------------------------------------------------------------------------------------------------------------------------------|----|
| 1. Experimental section                                                                                                                            | 3  |
| 1.1. General remarks                                                                                                                               | 3  |
| 1.2. Synthesis                                                                                                                                     | 4  |
| 2. $^1\text{H}$ and $^{13}\text{C}$ NMR spectra of the precursors and $^5[\text{Fe}^{\text{II}}(\text{NP}^{\text{iso}})(\text{Cl})](\text{BPh}_4)$ | 7  |
| 3. FTIR characterization of $^5[\text{Fe}^{\text{II}}(\text{NP}^{\text{iso}})(\text{Cl})](\text{BPh}_4)$                                           | 9  |
| 4. Single crystal and powder X-ray diffraction data of $^5[\text{Fe}^{\text{II}}(\text{NP}^{\text{iso}})(\text{Cl})](\text{BPh}_4)$                | 10 |
| 5. UV-vis spectroscopy studies of $^5[\text{Fe}^{\text{II}}(\text{NP}^{\text{iso}})(\text{Cl})](\text{BPh}_4)$                                     | 13 |
| 6. Electrochemical characterization of $^5[\text{Fe}^{\text{II}}(\text{NP}^{\text{iso}})(\text{Cl})](\text{BPh}_4)$                                | 14 |
| 7. Photocatalytic reactions                                                                                                                        | 19 |
| 7.1. Details on the TON, TOF, selectivity and quantum yield calculations                                                                           | 20 |
| 7.2. Photocatalytic experiments                                                                                                                    | 23 |
| 7.3. Control experiments of the photosensitizer                                                                                                    | 24 |
| 8. Mechanistic studies                                                                                                                             | 25 |
| 8.1. Quenching mechanism studies                                                                                                                   | 25 |
| 8.2. FTIR spectroelectrochemical studies                                                                                                           | 29 |
| 8.3. Electrospray Ionization Mass spectrometry (ESI-MS) solution studies                                                                           | 32 |
| 9. Additional Computational Data                                                                                                                   | 34 |
| 9.1 Electronic structure of initial species                                                                                                        | 34 |
| 9.2 Reduction potential calculations                                                                                                               | 35 |
| 9.3 Electronic structure of intermediates                                                                                                          | 40 |
| 10. References                                                                                                                                     | 43 |
| 11. Optimised coordinates                                                                                                                          | 47 |

## 1. Experimental section

### 1.1. General remarks

All reagents were used without further purification. The reagents used were purchased from different companies such as Sigma Aldrich, Acros Organics, Fluorochem and/or TCI. Solvent purifications were performed according to the book "Purification of Laboratory Chemicals" by Armarego and Perrin.<sup>1</sup> All reactions were done using standard Schlenk techniques and freshly distilled solvents. NMR spectra were recorded on a Bruker Advance 400 spectrometer using deuterated solvents ( $\text{CDCl}_3$  and  $\text{CD}_2\text{Cl}_2$ ). Infrared spectroelectrochemistry experiments were performed with  $\text{CO}_2$  or  $\text{N}_2$  saturated solutions of acetonitrile (MeCN) and dichloroethane (DCE) without further purification with a purity of 99%. 2,4,5,6-Tetra(9H-carbazol-9-yl)isophthalonitrile (4CzIPN) was synthesized through a reported procedure.<sup>2</sup> FTIR spectra were obtained on a Bruker INVENIO S FTIR spectrometer in the 400-4000  $\text{cm}^{-1}$  range with 4  $\text{cm}^{-1}$  resolution using KBr pellets. Elemental analysis (EA) for C, H and N were performed in triplicate with a Truspec Micro CHNS 630 200 200 elemental analyzer at the Department of Chemistry, University of Aveiro. Analysis parameters: sample amount 1.3 - 2.0 mg; combustion furnace temperature 1075  $^\circ\text{C}$ ; afterburner temperature 850  $^\circ\text{C}$ . Detection method: C, H and S through infrared absorption; N by thermal conductivity. Gases required: combustion - oxygen; carrier helium; pneumatic - compressed air.

## 1.2. Synthesis

Tris(2-bromo-*p*-tolyl)amine

Tris(2-bromo-*p*-tolyl)amine was synthesized according to the literature.<sup>3,4</sup> Tri-*p*-tolylamine (2.50 g, 8.6 mmol) was dissolved in CHCl<sub>3</sub> (25 mL) and a solution of bromine (1.34 mL) in CHCl<sub>3</sub> (5 mL) was added dropwise at ambient temperature resulting in a deep blue colour. The reaction mixture was stirred at room temperature for 24 h, and the reaction was stopped by the addition of a saturated, aqueous Na<sub>2</sub>SO<sub>3</sub> solution (60 mL). The aqueous layer was extracted with CHCl<sub>3</sub> (3×15 mL). The combined organic layers were washed with saturated, aqueous NaHCO<sub>3</sub> solution (2×20 mL), brine (1×20 mL) and dried over MgSO<sub>4</sub>. After evaporation of the solvent under reduced pressure the compound was obtained as a white solid (2.27 g, 4.3 mmol, η = 50 %). <sup>1</sup>H NMR (400 MHz, CDCl<sub>3</sub>, 298 K, ppm): δ = 2.30 (s, 9H, CH<sub>3</sub>), 6.69 (d, J = 8.1 Hz, 3H), 7.00 (dd, 3H), 7.40 (d, 3H).

Tris(2-diisopropylphosphine-*p*-tolyl)amine (**NP<sup>iso</sup>**)

Tris(2-diisopropylphosphine-*p*-tolyl)amine was synthesised according to the literature procedure.<sup>3</sup>

In a degassed Schlenk flask, tris(2-bromo-*p*-tolyl)amine (1 g, 1.89 mmol) was dissolved in dry Et<sub>2</sub>O (20 mL) and cooled down to -78 °C. A solution of *tert*-BuLi (1.70 M in heptane, 7 mL) was added portionwise over 15 min. The resulting mixture was warmed up to room temperature after 30 min. After 3 h of stirring, the reaction mixture showed a yellow colour and a white precipitate (LiBr). The Schlenk flask was cooled down again to -78 °C and chlorodiisopropylphosphine (1 mL, 6.24 mmol) was added over 5 min. The mixture was stirred at room temperature for 18 h and then it was filtered through a silica plug and the solvent removed under vacuum. The resulting tacky solid was dissolved in CH<sub>2</sub>Cl<sub>2</sub> (30 mL), filtered through Celite®, and dried to a solid. Trituration of the filtrate in cold MeOH (150 mL) afforded an analytically pure fine white solid, which was collected on a fritted glass funnel and dried under vacuum (0.94 g, 1.50 mmol, η = 78 %). <sup>1</sup>H NMR (400 MHz, CDCl<sub>3</sub>, 298 K, ppm): δ = 7.23 (s), 7.07 (br s), 6.93 (s), 6.91 (s), 6.85 (m), 6.63 (m), 6.57 (br s), 6.45 (m), 2.54 (m), 2.30 (s), 2.28 (s), 1.51 (m), 1.21 (m), 1.10 (m), 1.00 (br s), 0.91 (m), 0.80 (br s), 0.41 (m); <sup>31</sup>P NMR (400 MHz, CDCl<sub>3</sub>, 298 K, ppm): δ = -11.73.

<sup>5</sup>[Fe<sup>II</sup>(**NP<sup>iso</sup>**)(Cl)](BPh<sub>4</sub>)

The ligand tris(2-diisopropylphosphine-*p*-tolyl)amine (**NP<sup>iso</sup>**) and corresponding Fe(II) complex, abbreviated as <sup>5</sup>[Fe<sup>II</sup>(**NP<sup>iso</sup>**)(Cl)](BPh<sub>4</sub>), were prepared following modifications of previously reported procedures for the tripodal **NP<sup>iso</sup>** ligand and its metal complexes.<sup>3</sup> The <sup>5</sup>[Fe<sup>II</sup>(**NP<sup>iso</sup>**)(Cl)](BPh<sub>4</sub>) was obtained with a yield of 52% by stirring the ligand **NP<sup>iso</sup>** with the FeCl<sub>2</sub> precursor and NaBPh<sub>4</sub> in dry tetrahydrofuran at 65 °C for 12 h under N<sub>2</sub> atmosphere. Single

crystals of  $^5[\text{Fe}^{\text{II}}(\text{NP}^{\text{iso}})(\text{Cl})](\text{BPh}_4)$  were obtained as yellow blocks by slow diffusion of diethyl ether into a saturated dichloromethane solution under  $\text{N}_2$  atmosphere.

The  $^1\text{H}$  NMR spectrum of  $^5[\text{Fe}^{\text{II}}(\text{NP}^{\text{iso}})(\text{Cl})](\text{BPh}_4)$  was obtained in deuterated dichloromethane ( $\text{CD}_2\text{Cl}_2$ ) and matched the data previously reported by Peters and co-workers (Figures S1 to S5).<sup>3</sup>

FTIR confirmed the presence of the characteristic vibrational modes of the  $\text{B}^{\text{Ph}_4^-}$  anion  $\tilde{\nu}(\text{B}^{\text{Ph}_4^-})$  at 731, 704  $\text{cm}^{-1}$ , as well as the bands attributed to aromatic and aliphatic groups  $\tilde{\nu}(\text{C-H})$  at  $\sim 3047$ , 2971 and 2916  $\text{cm}^{-1}$ ,  $\tilde{\nu}(\text{C=C})$  and  $\tilde{\nu}(\text{C-P}) \sim 1630$ , 1471 and 645  $\text{cm}^{-1}$ , respectively (Figure S6).

In a degassed J Young glass reactor, to a solution of  $\text{NP}^{\text{iso}}$  (0.55 g, 0.90 mmol) in dry THF (20 mL) was added  $\text{FeCl}_2$  (0.110 g, 0.84 mmol) and sodium tetraphenylborate (0.297 g, 0.84 mmol). The mixture was heated up to 70  $^\circ\text{C}$  for 12 h. After this time the reaction mixture was cooled down to room temperature and the solvent was removed under vacuum. The resulting yellow crude product was washed with petroleum ether ( $2 \times 20$  mL) and dried under reduced pressure. The product was extracted with  $\text{CH}_2\text{Cl}_2$  and filtered through Celite®. The remaining  $\text{CH}_2\text{Cl}_2$  solution was layered with  $\text{Et}_2\text{O}$  affording pure yellow single crystals suitable for X-ray diffraction (0.495 g, 0.470 mmol,  $\eta = 52\%$ ).  $^1\text{H}$  NMR (400 MHz,  $\text{CD}_2\text{Cl}_2$ , 298 K, ppm):  $\delta = 141.9$  (br s), 30.6 (br s), 19.6 (br s), 15.4 (s), 7.8 (s), 7.2 (s), 5.5 (m), 3.1 (s), 2.6 (m), 1.66 (s), 1.1 (s)  $-2.8$  (br s),  $-16.0$  (br s),  $-20.6$  (br s); UV-Vis bands (nm) were as follows: 198 ( $\epsilon = 400000 \text{ M}^{-1} \text{ cm}^{-1}$ ), 297 ( $\epsilon = 23000 \text{ M}^{-1} \text{ cm}^{-1}$ ); FTIR vibration modes ( $\tilde{\nu}/\text{cm}^{-1}$ ) were as follows: 3047, 2971, 2916 (C-H aromatic, stretching); 1471 (C=C, stretching); 731, 704 ( $\text{B}^{\text{Ph}_4^-}$ , stretching); 645 (P-C, stretching); Elemental Analysis ( $\mathbf{1} \bullet 0.2 \text{ CH}_2\text{Cl}_2$ ) **exp.** C 71.32, H 6.83, N 1.40 **calc.** C 71.39, H 7.62, N 1.32.

## 2. $^1\text{H}$ and $^{13}\text{C}$ NMR spectra of the precursors and $^5[\text{Fe}^{\text{II}}(\text{NP}^{\text{iso}})(\text{Cl})](\text{BPh}_4)$

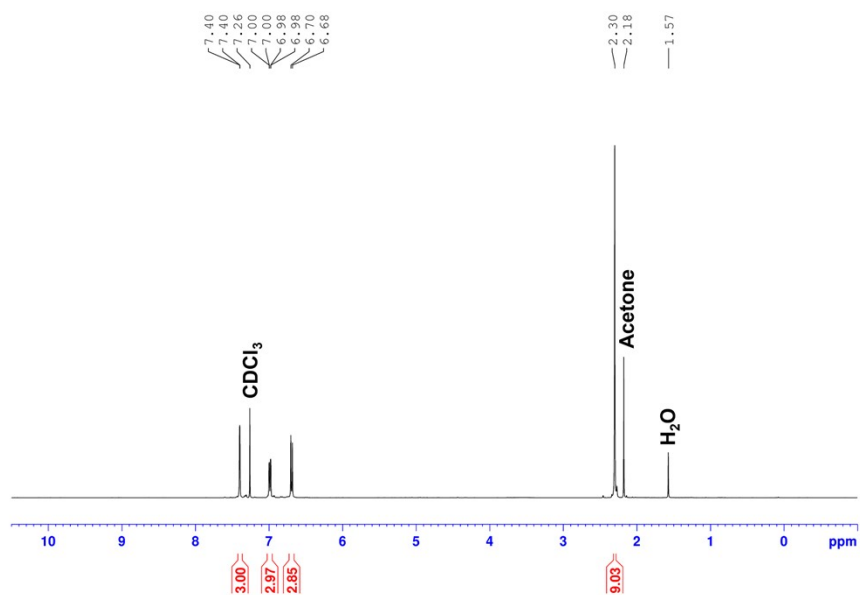

Figure S1:  $^1\text{H}$  NMR spectrum of tris(2-bromo-*p*-tolyl)amine, in  $\text{CDCl}_3$ .

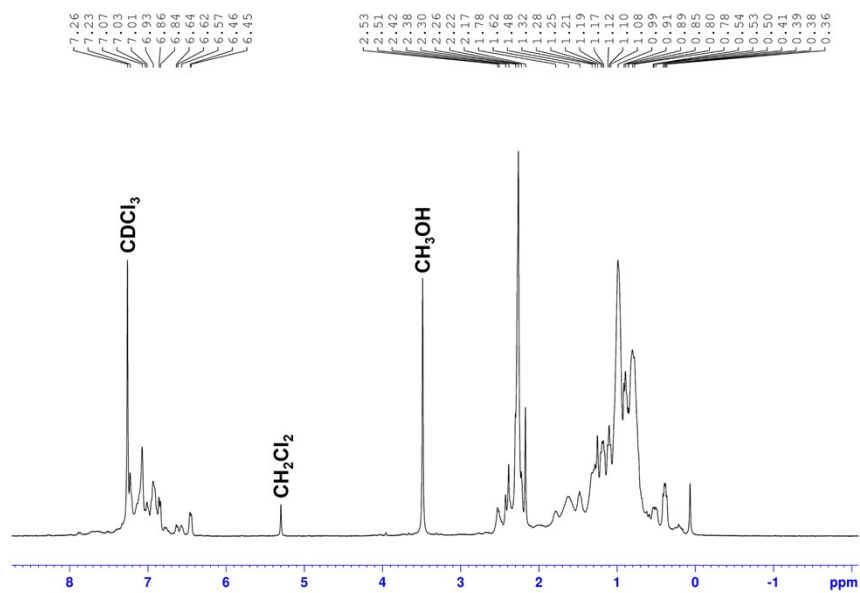

Figure S2:  $^1\text{H}$  NMR spectrum of  $\text{NP}^{\text{iso}}$ , in  $\text{CDCl}_3$ .

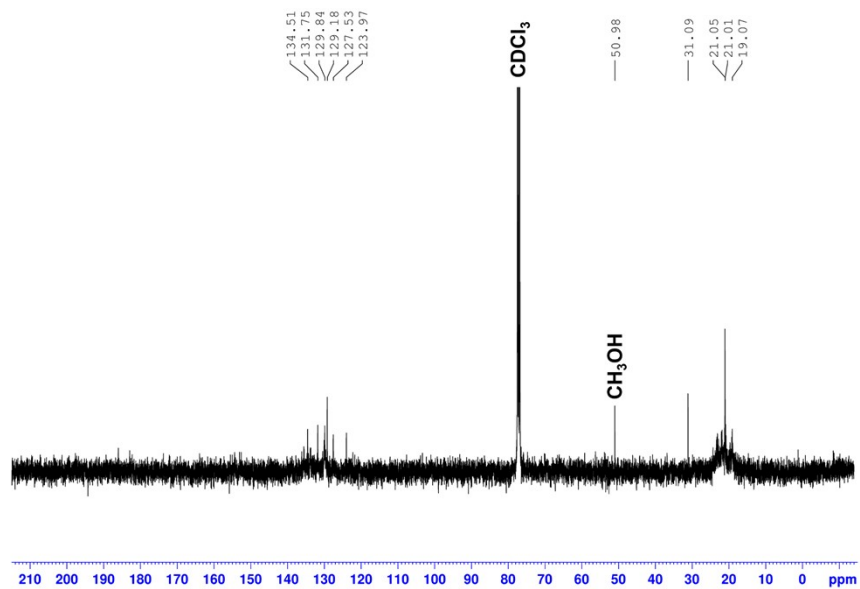

Figure S3:  $^{13}\text{C}$  NMR spectrum of  $\text{NP}^{\text{iso}}$ , in  $\text{CDCl}_3$ .

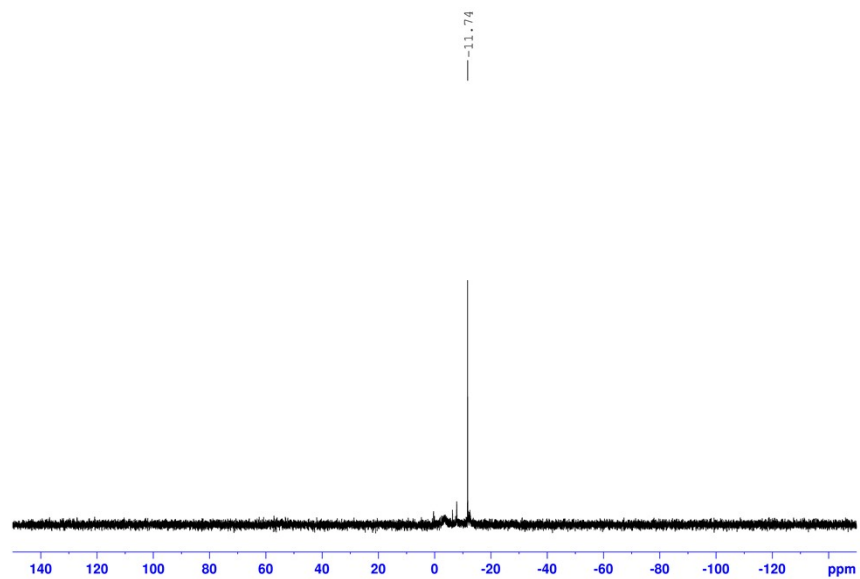

Figure S4:  $^{31}\text{P}$  NMR spectrum of  $\text{NP}^{\text{iso}}$ , in  $\text{CDCl}_3$ .

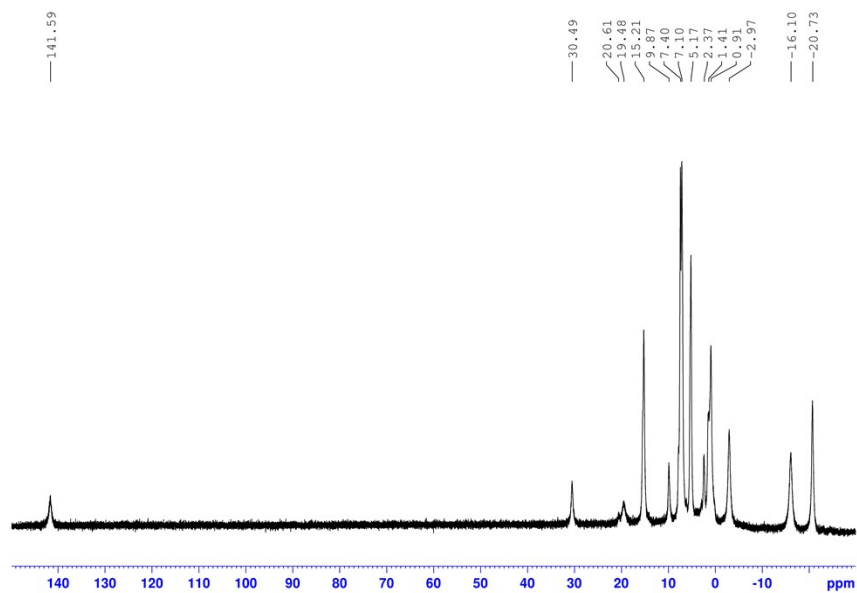

Figure S5:  $^1\text{H}$  NMR spectrum of  $\text{NP}^{\text{iso}}$ , in  $\text{CD}_2\text{Cl}_2$ .

### 3. FTIR characterisation of $^5[\text{Fe}^{\text{II}}(\text{NP}^{\text{iso}})(\text{Cl})](\text{BPh}_4)$

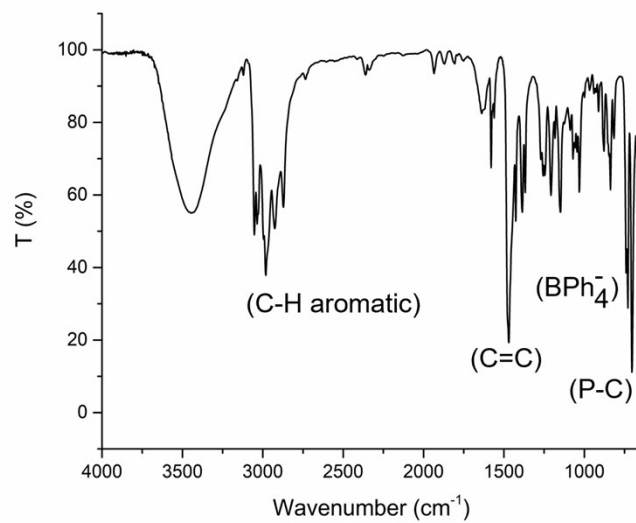

Figure S6: FTIR spectrum of  $^5[\text{Fe}^{\text{II}}(\text{NP}^{\text{iso}})(\text{Cl})](\text{BPh}_4)$  in KBr pellet.

#### 4. Single crystal and powder X-ray diffraction data of $^5[\text{Fe}^{\text{II}}(\text{NP}^{\text{iso}})(\text{Cl})](\text{BPh}_4)$

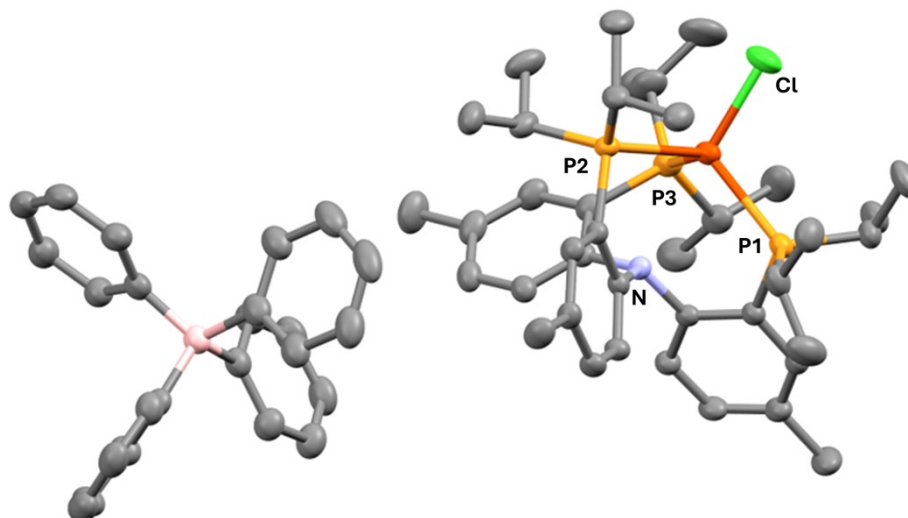

Figure S7: X-ray crystal structure of  $^5[\text{Fe}^{\text{II}}(\text{NP}^{\text{iso}})(\text{Cl})](\text{BPh}_4)$ . Fe (dark orange); Cl (green); P (light orange); N (blue); C (grey); B (pink). Hydrogens were omitted for clarity.

Table S1: Crystal data and structure refinement for  $^5[\text{Fe}^{\text{II}}(\text{NP}^{\text{iso}})(\text{Cl})](\text{BPh}_4)$  at 150 K (CCDC #261769).

| <b>Compound</b>                                   | <b><math>^5[\text{Fe}^{\text{II}}(\text{NP}^{\text{iso}})(\text{Cl})](\text{BPh}_4)</math></b> |
|---------------------------------------------------|------------------------------------------------------------------------------------------------|
| <b>Empirical formula</b>                          | $\text{C}_{63}\text{H}_{80}\text{BClFeNP}_3$                                                   |
| <b>Formula weight</b>                             | 1046.346                                                                                       |
| <b>Temperature (K)</b>                            | 150                                                                                            |
| <b>Wavelength (<math>\text{\AA}</math>)</b>       | 0.71073                                                                                        |
| <b>Crystal system</b>                             | Triclinic                                                                                      |
| <b>Space group</b>                                | $\text{P}\bar{1}$                                                                              |
| <b>Unit cell dimensions:</b>                      |                                                                                                |
| <b>a (<math>\text{\AA}</math>)</b>                | 10.9752(9)                                                                                     |
| <b>b (<math>\text{\AA}</math>)</b>                | 15.0135(11)                                                                                    |
| <b>c (<math>\text{\AA}</math>)</b>                | 17.9619(14)                                                                                    |
| <b><math>\alpha</math> (<math>^\circ</math>)</b>  | 84.014(3)                                                                                      |
| <b><math>\beta</math> (<math>^\circ</math>)</b>   | 79.191(3)                                                                                      |
| <b><math>\lambda</math> (<math>^\circ</math>)</b> | 89.227(3)                                                                                      |
| <b>Volume (<math>\text{\AA}^3</math>)</b>         | 2891.27                                                                                        |
| <b>Z</b>                                          | 2                                                                                              |

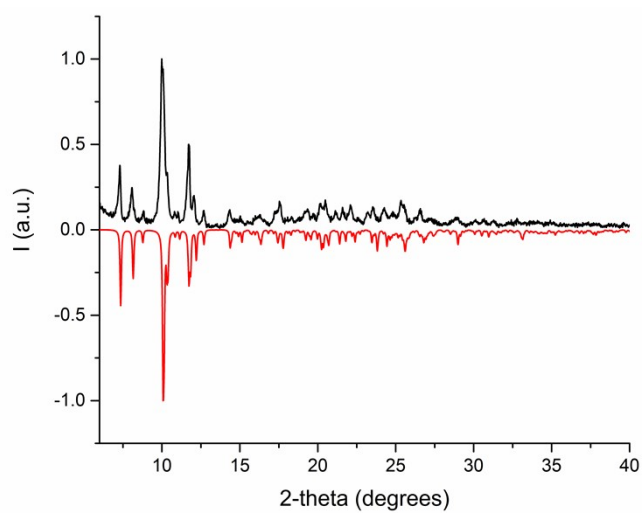

Figure S8: Powder X-ray diffraction patterns for  $5[\text{Fe}^{\text{II}}(\text{NP}^{\text{iso}})(\text{Cl})](\text{BPh}_4)$  experimental data (black) and simulated data obtained from the SC-XRD structure (red).

## 5. UV-vis spectroscopy studies of $^5[\text{Fe}^{\text{II}}(\text{NP}^{\text{iso}})(\text{Cl})](\text{BPh}_4)$

### UV-vis studies

UV-vis spectra were recorded on a Shimadzu 50/60 Hz spectrometer using a 3 mL solution of  $^5[\text{Fe}^{\text{II}}(\text{NP}^{\text{iso}})(\text{Cl})](\text{BPh}_4)$  in acetonitrile ( $1 \times 10^{-5}$  M).

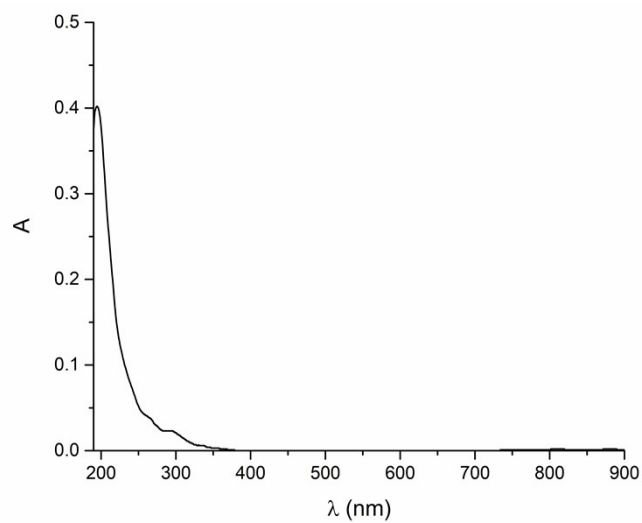

Figure S9: UV-vis spectrum of  $^5[\text{Fe}^{\text{II}}(\text{NP}^{\text{iso}})(\text{Cl})](\text{BPh}_4)$  ( $1 \times 10^{-6}$  M) in MeCN.

## 6. Electrochemical characterization of $^5[\text{Fe}^{\text{II}}(\text{NP}^{\text{iso}})(\text{Cl})](\text{BPh}_4)$

### Electrochemical procedures

Cyclic voltammetry experiments were performed using 1 mM MeCN or DCE solutions of the complex, under  $\text{N}_2$  (obtained by direct evaporation of liquid  $\text{N}_2$ ) or  $\text{CO}_2$  (99.995%) saturated atmosphere in a three-electrode one compartment electrochemical cell at  $0.1 \text{ mV s}^{-1}$ . The solvents used in these studies had a purity of 99% and were bubbled for 30 min prior to the addition of the complex. Glassy carbon (CHI Instruments, 3 mm diameter) and platinum wire were used as working and counter electrodes, respectively. Ag wire was used as the pseudo-reference electrode and tetrabutylammonium hexafluorophosphate ( $\text{TBAPF}_6$ ) (0.1 M) as the supporting electrolyte (recrystallized from hot ethanol). Ferrocene was used as an internal standard, and all potentials are referenced to ferrocene/ferrocenium couple. The working electrode was polished with alumina paste of 1 and  $0.05 \mu\text{m}$  diameter sizes and washed thoroughly with Milli-Q water and dried with nitrogen.

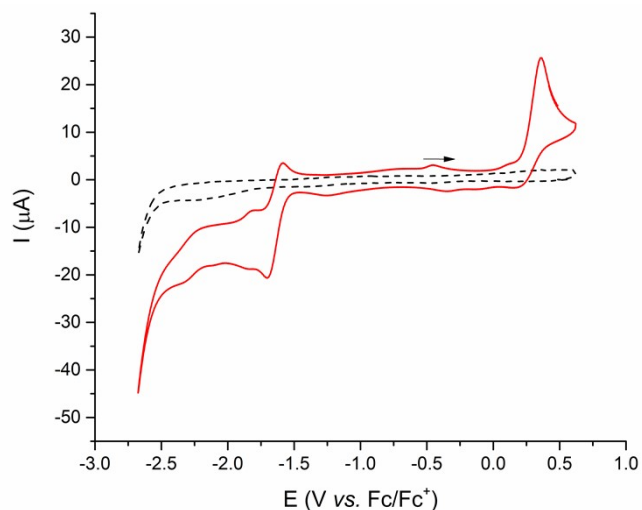

Figure S10: Cyclic voltammogram of  $^5[\text{Fe}^{\text{II}}(\text{NP}^{\text{iso}})(\text{Cl})](\text{BPh}_4)$  under  $\text{N}_2$  atmosphere in DCE.

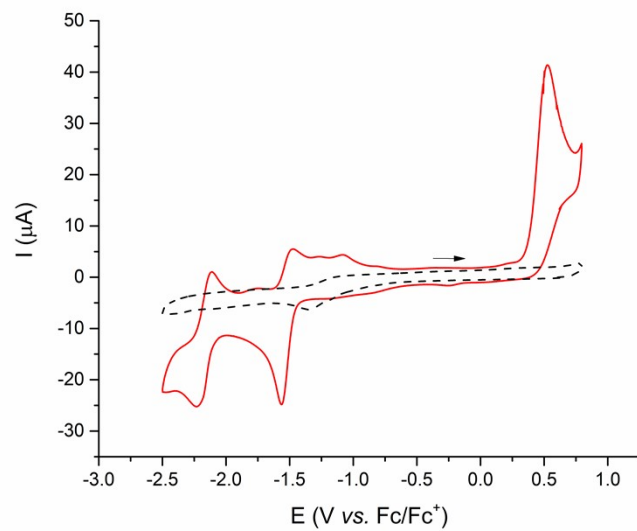

Figure S11: Cyclic voltammogram of  $5[\text{Fe}^{\text{II}}(\text{NP}^{\text{iso}})(\text{Cl})](\text{BPh}_4)$  under  $\text{N}_2$  atmosphere in MeCN.

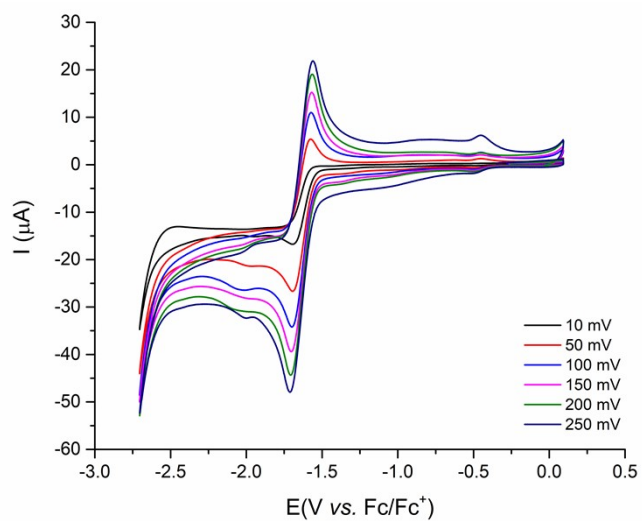

Figure S12: Cyclic voltammogram of  $^5[\text{Fe}^{\text{II}}(\text{NP}^{\text{iso}})(\text{Cl})](\text{BPh}_4)$  under  $\text{N}_2$  atmosphere in DCE at different scan rates.

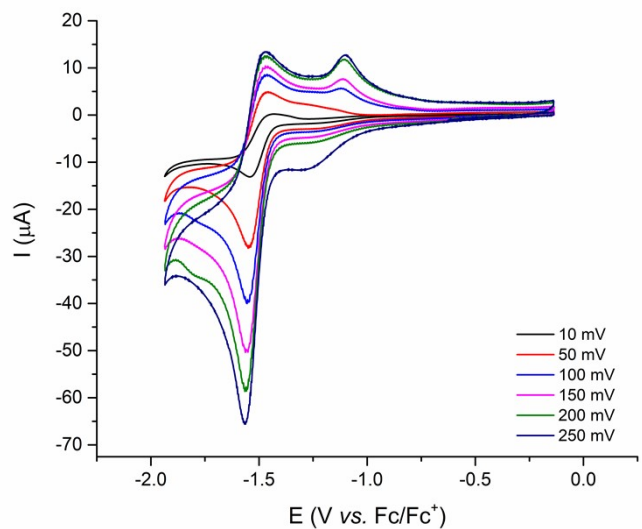

Figure S13: Cyclic voltammogram of  $^5[\text{Fe}^{\text{II}}(\text{NP}^{\text{iso}})(\text{Cl})](\text{BPh}_4)$  under  $\text{N}_2$  atmosphere in MeCN at different scan rates.

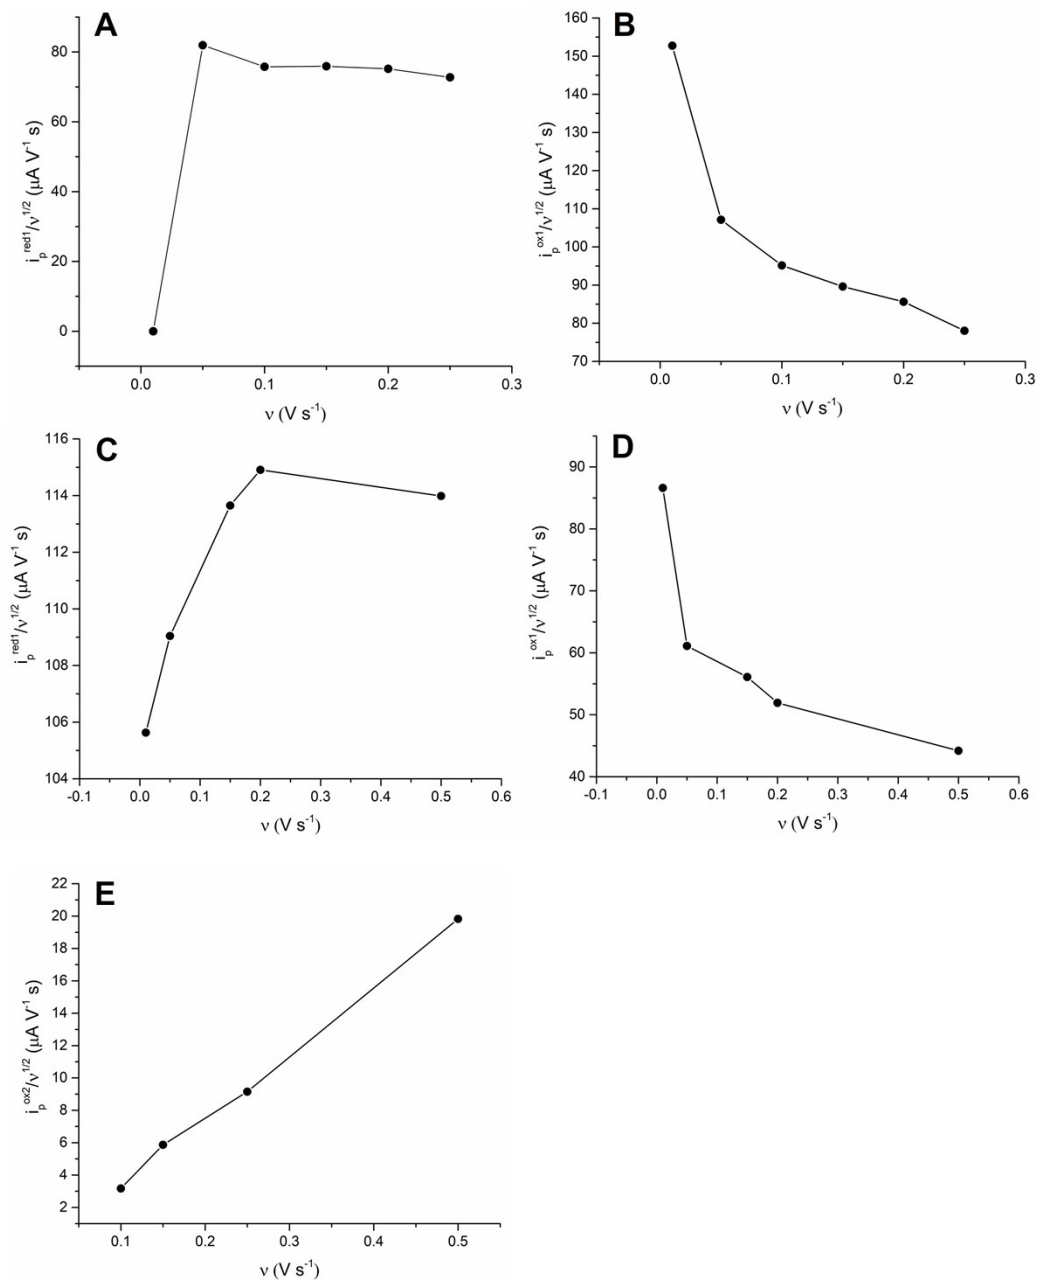

Figure S14: Diagnostic criteria showing the variation of the parameter  $i_p / v^{1/2}$  as a function of the scan rate ( $v$ ) in DCE (Panel A and B) and in MeCN (Panel C, D and E) under  $\text{N}_2$  atmospheres. Panel A refers to the reduction wave and Panel B to the oxidation wave in DCE (Figure S12). Panel C refers to the reduction wave, Panel D refers to the 1<sup>st</sup> oxidation wave and Panel E to the 2<sup>nd</sup> oxidation wave in MeCN (Figure S13). TBAPF<sub>6</sub> was used as supporting electrolyte (0.1 M). Glassy carbon (3 mm diameter) was used as working, platinum wire as counter and Ag/Ag<sup>+</sup> as reference electrodes. Fc was used as internal standard.

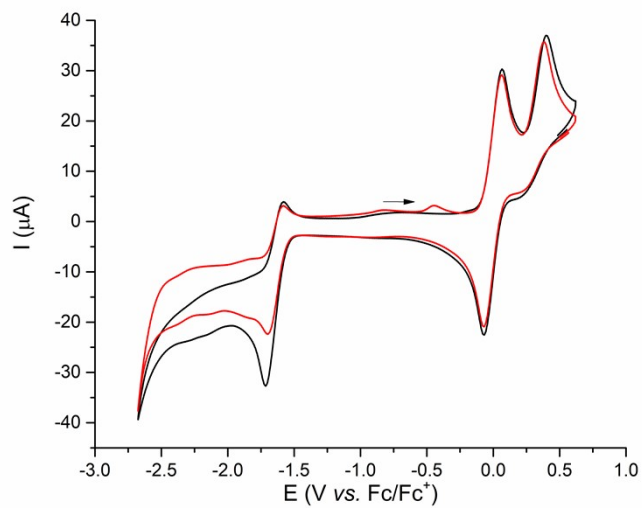

Figure S15: Cyclic voltammogram overlay of  $^5[\text{Fe}^{\text{II}}(\text{NP}^{\text{iso}})(\text{Cl})](\text{BPh}_4)$  under  $\text{N}_2$  atmosphere (red) and under  $\text{CO}_2$  atmosphere (black) in DCE.

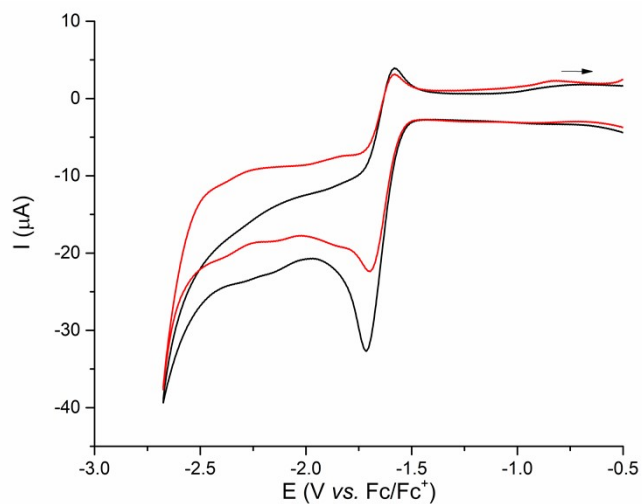

Figure S16: Cyclic voltammogram overlay ampliation of  $^5[\text{Fe}^{\text{II}}(\text{NP}^{\text{iso}})(\text{Cl})](\text{BPh}_4)$  under  $\text{N}_2$  atmosphere (red) and under  $\text{CO}_2$  atmosphere (black) in DCE.

## 7. Photocatalytic reactions

### Photoreduction experiments

CO<sub>2</sub> photoreduction experiments were performed in a 16 mL quartz reactor, directly exposed to 30 W blue LED light (300 LEDs strip RGB+W SMD5050 IP20 12VDC 18 W/m (90 W) 6000 K (cold white) 1250 lm/m – strip length: 5.0 m.). The experiments were carried out under a saturated CO<sub>2</sub> atmosphere using 5 mL solutions of different concentrations of the catalyst (0.5 μM, 5 μM and 50 μM), BIH (0.1 M), [Ir(dtbbpy)(ppy)<sub>2</sub>](PF<sub>6</sub>) (0.2 mM) and phenol (1 M) in MeCN. These solutions were stirred with a magnetic bar and irradiated for several periods of time. The gases produced were analyzed by gas chromatography equipment fitted with a thermal conductivity detector (GC-TCD) using gas-tight syringes (500 μL) previously purged with CO<sub>2</sub> and the liquid products were not analyzed. Following each injection, the temperature of the quartz reactor was measured using a thermometer.

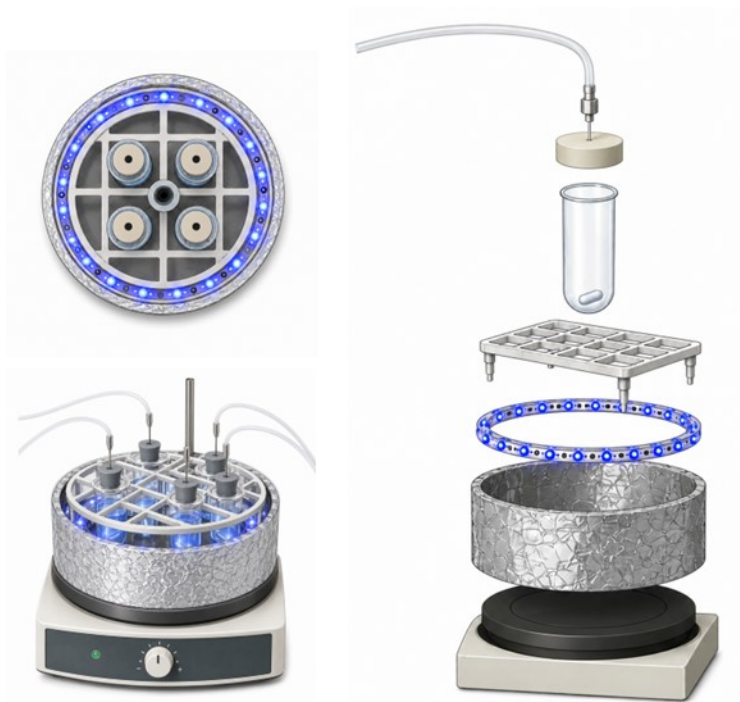

Scheme S1: Schematic representation of the photoreactor setup used for the CO<sub>2</sub> photoreduction experiments. Left: top view showing the circular arrangement of the LEDs surrounding the sample holder, which accommodates multiple sealed quartz tubes. Right: exploded side view illustrating the assembly of the photoreactor components. From bottom to top: fan-cooled base unit, LED strip mounted inside the reactor chamber, sample holder rack, and sealed quartz tube fitted with a septum cap.

For gaseous products quantification, GC-TCD was used from Agilent Technology (GC-TCD 7820A) controlled by OpenLAB ChemStation edition software. A HP-MOLESIEVE capillary GC Column (L×I.D. 30 m×0.32 mm, average thickness 12 μm) was used for H<sub>2</sub>, CO, CH<sub>4</sub>, and CO<sub>2</sub> detection. The temperature was held at 200 °C and 220 °C both for the injector and the detector (respectively). The carrier gas was Ar flowing at 1.7 mL min<sup>-1</sup> and injections were performed with gas-tight syringes (250 or 500 μL) previously purged with CO<sub>2</sub>. The method was based on a temperature ramp in the oven starting at 40 °C for 8 min and gradually increased to 200 °C for 12 min (retention times (min): H<sub>2</sub> 1.91, O<sub>2</sub> 2.02, N<sub>2</sub> 2.20, CO 3.18, CO<sub>2</sub> 10.18). Calibration curves were obtained for H<sub>2</sub>, CO and CH<sub>4</sub> separately by injecting known volumes of the pure gas.

### 7.1. Details on the TON, TOF, selectivity and quantum yield calculations

The control experiments without <sup>5</sup>[Fe<sup>II</sup>(N<sup>P</sup>iso)(Cl)](BPh<sub>4</sub>) (Table S2, Entry 4), reveal that [Ir(dtbbpy)(ppy)<sub>2</sub>](PF<sub>6</sub>) can be active for the CO<sub>2</sub> photoreduction reaction producing 1.35 μmol of CO, however the use of <sup>5</sup>[Fe<sup>II</sup>(N<sup>P</sup>iso)(Cl)](BPh<sub>4</sub>) as a catalyst is crucial to improve the amount of CO produced in this system. In table S3, the results of the photoreduction reactions shown are relative to the modification of the PS component, demonstrating that [Ir(dtbbpy)(ppy)<sub>2</sub>](PF<sub>6</sub>) is the

best PS used in this system. The variation of the SED was also tested by changing BIH for triethanolamine (0.3 M), unfortunately, no CO was detected in the same conditions described in table S3.

The photoreduction experiments under a N<sub>2</sub> atmosphere reveal that the CO produced by <sup>5</sup>[Fe<sup>II</sup>(NP<sup>iso</sup>)(Cl)](BPh<sub>4</sub>) comes from the CO<sub>2</sub> reduction reaction and not from degradation of any other compounds present in the system (Table S2, Entry 5). A series of control experiments without the PS, SED and proton source component were conducted (Table S2, Entry 6-8). The results obtained demonstrate that <sup>5</sup>[Fe<sup>II</sup>(NP<sup>iso</sup>)(Cl)](BPh<sub>4</sub>) did not produce CO when the PS or the SED were not used, demonstrating that without a light absorber or a molecule able to promote the electron transfer in the system the production of active species able to reduce CO<sub>2</sub> is not achieved. When the proton source was not used, it was possible to detect CO in only trace amounts, suggesting that the residual amount of H<sub>2</sub>O present in MeCN was sufficient to act as a proton source.

Upon using simple iron salts such as anhydrous FeCl<sub>2</sub> (Table S2, Entry 9), the results show that the molecular structure of <sup>5</sup>[Fe<sup>II</sup>(NP<sup>iso</sup>)(Cl)](BPh<sub>4</sub>) is important to enhance both the amount of CO produced and the selectivity of the system. To understand the effect of the proton source in the system, phenol was substituted by H<sub>2</sub>O and isopropanol (*i*PrOH) (Table S2, Entry 10-13, Figure S17).

Table S2: Optimization of the catalyst concentration and control experiments for CO<sub>2</sub> reduction reaction.

| Entry | [Cat]<br>[μM] | <i>n</i> <sub>H<sub>2</sub></sub><br>[μmol] | <i>n</i> <sub>CO</sub><br>[μmol] | Selectivity <sub>CO</sub><br>[%] | TON <sub>CO</sub> | TOF <sub>CO</sub><br>[h <sup>-1</sup> ] | Φ <sub>CO</sub><br>[%] |
|-------|---------------|---------------------------------------------|----------------------------------|----------------------------------|-------------------|-----------------------------------------|------------------------|
| 1     | 50            | 74.47                                       | 15.61                            | 17                               | 62                | 21                                      | 3.01                   |
| 2     | 5             | 13.72                                       | 5.94                             | 30                               | 238               | 79                                      | 1.15                   |

|                       |     |      |      |    |      |     |      |
|-----------------------|-----|------|------|----|------|-----|------|
| <b>3</b>              | 0.5 | 5.11 | 2.96 | 37 | 1183 | 394 | 0.57 |
| <b>4</b>              | 0   | 3.47 | 1.35 | -  | -    | -   | -    |
| <b>5<sup>a</sup></b>  | 0.5 | 1.38 | 0    | -  | -    | -   | -    |
| <b>6<sup>b</sup></b>  | 0.5 | 0    | 0    | -  | -    | -   | -    |
| <b>7<sup>c</sup></b>  | 0.5 | 0    | 0    | -  | -    | -   | -    |
| <b>8<sup>d</sup></b>  | 0.5 | 0.02 | 0.33 | 94 | 132  | 44  | 0.06 |
| <b>9<sup>e</sup></b>  | 0.5 | 3.74 | 1.38 | 27 | 551  | 183 | 0.27 |
| <b>10<sup>f</sup></b> | 0   | 2.19 | 1.07 | -  | -    | -   | -    |
| <b>11<sup>f</sup></b> | 0.5 | 0.53 | 3.34 | 86 | 1335 | 445 | 0.64 |
| <b>12<sup>g</sup></b> | 0   | 0.70 | tr.  | -  | -    | -   | -    |
| <b>13<sup>g</sup></b> | 0.5 | 0.37 | tr.  | -  | -    | -   | -    |

In a typical run, a CO<sub>2</sub>-saturated acetonitrile (MeCN) solution containing <sup>5</sup>[Fe<sup>II</sup>(NP<sup>iso</sup>)(Cl)](BPh<sub>4</sub>), [Ir(dtbbpy)(ppy)<sub>2</sub>](PF<sub>6</sub>) (0.2 mM), BIH (0.1 M) and phenol (1 M) was irradiated using blue LED strip lights (30 W) for 3 h under a CO<sub>2</sub> atmosphere. <sup>a</sup>Under an N<sub>2</sub> atmosphere. <sup>b</sup>Without [Ir(dtbbpy)(ppy)<sub>2</sub>](PF<sub>6</sub>). <sup>c</sup>Without BIH. <sup>d</sup>Without Phenol. <sup>e</sup>Using anhydrous FeCl<sub>2</sub> as catalyst. <sup>f</sup>Using H<sub>2</sub>O as a proton source in a ratio of 4.5:0.5 (MeCN:H<sub>2</sub>O). <sup>g</sup>Using isopropanol (*i*PrOH) as a proton source in a ratio of 4.5:0.5 (MeCN:*i*PrOH). For the quantum yield calculation to the CO formation, the number of photons was calculated using K<sub>3</sub>[Fe(C<sub>2</sub>O<sub>4</sub>)<sub>3</sub>] actinometer method (2.63 × 10<sup>17</sup> photons per second).

All the equations used to calculate all the parameters discussed in this paper are summarized below, and were used according to the literature.<sup>5-8</sup>

$$TON = \frac{n_{CO}}{n_{catalyst}} \quad (1)$$

$$TOF = \frac{TON}{time (h)} \quad (2)$$

$$Selectivity (\%) = \frac{n_{CO}}{n_{all\ products}} \quad (3)$$

$$\phi_{CO} = \frac{n_{CO} \times n_{e^-}}{n_{incident\ photons} \times 100\%} \quad (4)$$

## 7.2. Photocatalytic experiments

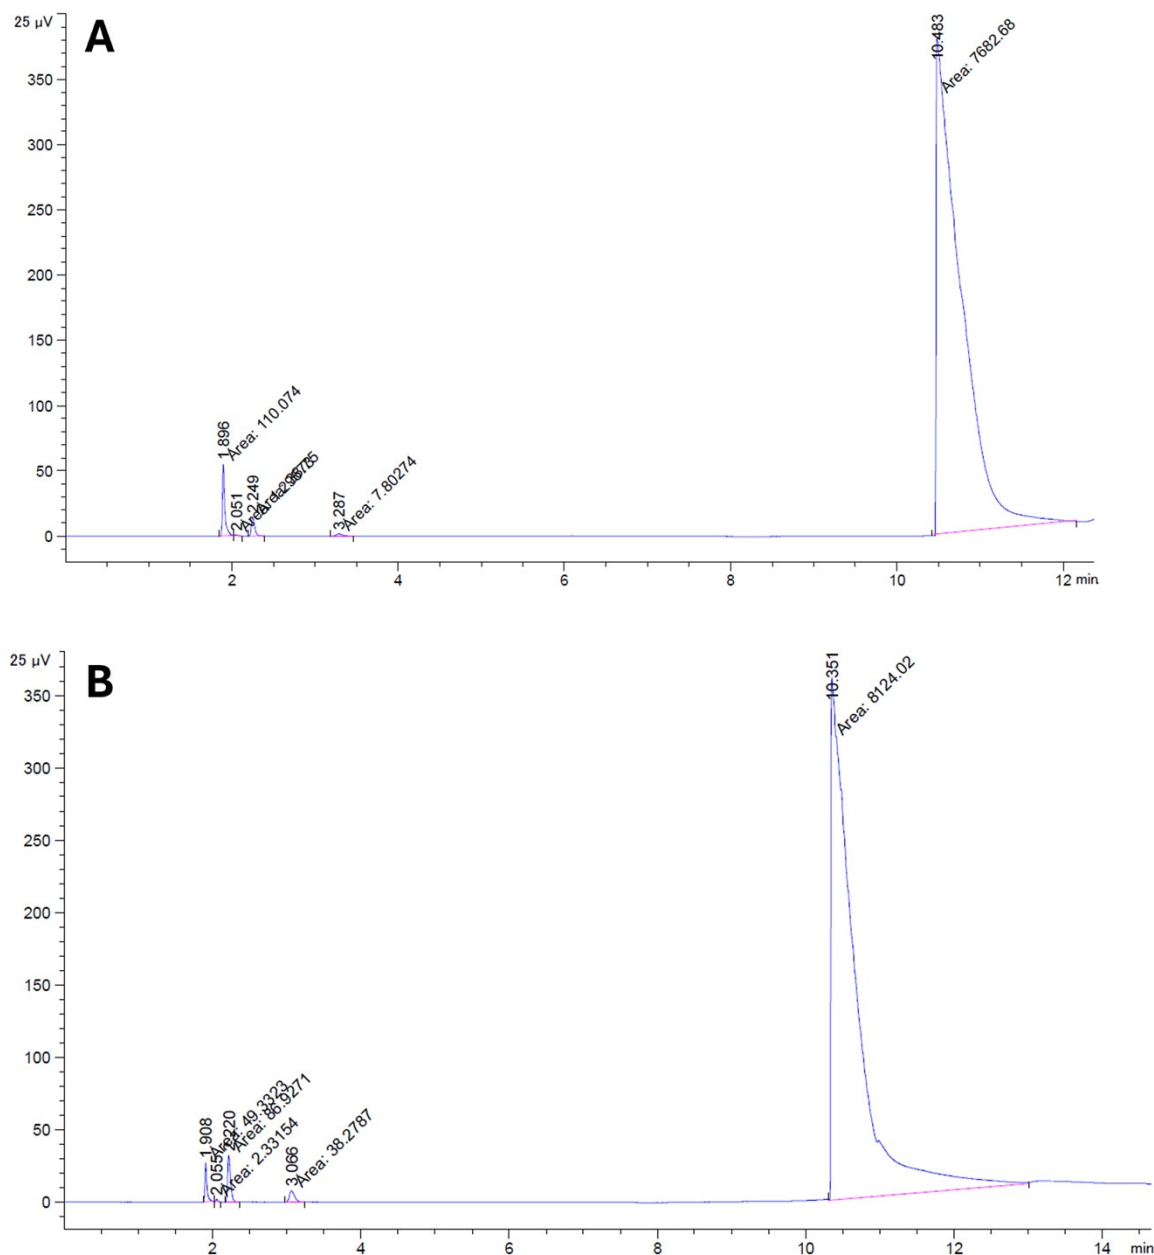

Figure S17: GC-TCD chromatograms of CO<sub>2</sub> photoreduction experiment using a mixture of MeCN:H<sub>2</sub>O (4.5:0.5), BIH (0.1 M), [Ir(dtbbpy)(ppy)<sub>2</sub>](PF<sub>6</sub>) (0.2 mM) 30 W blue LED light (300 LEDs strip RGB+W SMD5050 IP20 12VDC 18 W/m (90 W) 6000 K (cold white) 1250 lm/m – strip length: 5.0 m.) without <sup>5</sup>[Fe<sup>II</sup>(NP<sup>iso</sup>)(Cl)](BPh<sub>4</sub>) for 3 h using a) 0 μM and b) 0.5 μM of <sup>5</sup>[Fe<sup>II</sup>(NP<sup>iso</sup>)(Cl)](BPh<sub>4</sub>).

### 7.3. Control experiments of the photosensitizer

Table S3: Control experiments of the photosensitizer for CO<sub>2</sub> reduction reaction.

| PS                                                                   | $n_{H_2}$           | $n_{CO}$            | Selectivity <sub>CO</sub> | TON <sub>CO</sub> | TOF <sub>CO</sub>  | $\Phi_{CO}$ |
|----------------------------------------------------------------------|---------------------|---------------------|---------------------------|-------------------|--------------------|-------------|
|                                                                      | [ $\mu\text{mol}$ ] | [ $\mu\text{mol}$ ] | [%]                       |                   | [h <sup>-1</sup> ] | [%]         |
| [Ru(bpy) <sub>3</sub> ](PF <sub>6</sub> ) <sub>2</sub> <sup>a</sup>  | 0.39                | 0                   | -                         | -                 | -                  | -           |
| [Ru(bpy) <sub>3</sub> ](PF <sub>6</sub> ) <sub>2</sub>               | 5.84                | 1.43                | 20                        | 6                 | 2                  | 0.28        |
| [Ru(phen) <sub>3</sub> ](PF <sub>6</sub> ) <sub>2</sub> <sup>a</sup> | 0.10                | 0                   | -                         | -                 | -                  | -           |
| [Ru(phen) <sub>3</sub> ](PF <sub>6</sub> ) <sub>2</sub>              | 7.46                | 1.63                | 18                        | 7                 | 2                  | 0.31        |
| 4CzIPN <sup>a</sup>                                                  | 0                   | 0                   | -                         | -                 | -                  | -           |
| 4CzIPN                                                               | 0                   | 0                   | -                         | -                 | -                  | -           |
| [Ir(dtbbpy)(ppy) <sub>2</sub> ](PF <sub>6</sub> ) <sup>a</sup>       | 3.47                | 1.35                | -                         | -                 | -                  | -           |
| [Ir(dtbbpy)(ppy) <sub>2</sub> ](PF <sub>6</sub> )                    | 74.47               | 15.61               | 17                        | 62                | 21                 | 3.01        |

In a typical run, a CO<sub>2</sub>-saturated MeCN solution containing <sup>5</sup>[Fe<sup>II</sup>(NP<sup>iso</sup>)(Cl)](BPh<sub>4</sub>) (50  $\mu\text{M}$ ), [Ir(dtbbpy)(ppy)<sub>2</sub>](PF<sub>6</sub>) (0.2 mM), BIH (0.1 M) and phenol (1 M) was irradiated using blue LED strip lights (30 W) for 3 h under a CO<sub>2</sub> atmosphere. <sup>a</sup>Without catalyst. For the quantum yield calculation to the CO formation, the number of photons was calculated using K<sub>3</sub>[Fe(C<sub>2</sub>O<sub>4</sub>)<sub>3</sub>] actinometer method ( $2.63 \times 10^{17}$  photons per second).<sup>6</sup>

## 8. Mechanistic studies

### 8.1. Quenching mechanism studies

#### Fluorescence studies

UV-vis spectra were recorded on a Shimadzu 50/60 Hz spectrometer using a 3 mL solution of  $^5[\text{Fe}^{\text{II}}(\text{NP}^{\text{iso}})(\text{Cl})](\text{BPh}_4)$  in acetonitrile ( $1 \times 10^{-5}$  M). Emission spectra were recorded on a Fluorolog 3.22 spectrofluorometer from Horiba-Jobin-Yvon (Model FL-1065). Excited-state quenching experiments were carried out by adding either BIH or  $^5[\text{Fe}^{\text{II}}(\text{NP}^{\text{iso}})(\text{Cl})](\text{BPh}_4)$  in 100  $\mu\text{M}$  increments to a  $\text{CO}_2$ -saturated solution of  $[\text{Ir}(\text{dtbbpy})(\text{ppy})_2](\text{PF}_6)$  ( $1.25 \times 10^{-5}$  M). The relative emission lifetime of the photosensitizer in the presence of quencher was used to calculate the Stern-Volmer quenching constant ( $k_q$ ) using the following equation:

$$I_0/I_Q = 1 + \tau_f k_q [\text{Q}]$$

where  $I_0/I_Q$  is the emission intensity in the absence ( $I_0$ ) or presence ( $I_Q$ ) of quencher,  $\tau_f$  is the <sup>9</sup>

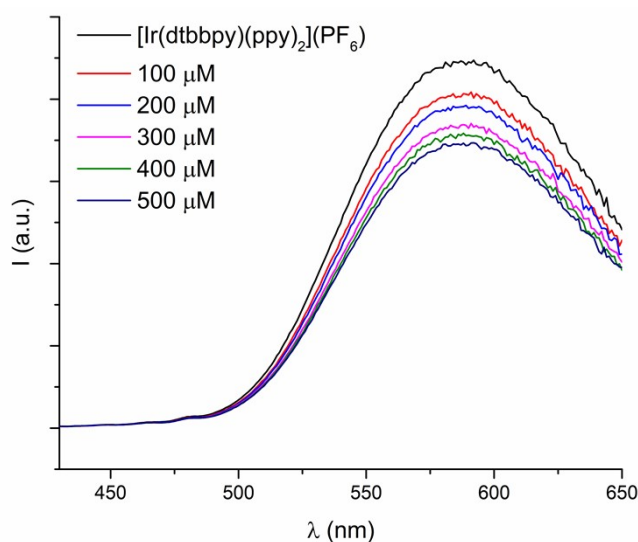

Figure S18: Normalized emission spectra of  $[\text{Ir}(\text{dtbbpy})(\text{ppy})_2](\text{PF}_6)$  ( $2.5 \times 10^{-5}$  M) in MeCN ( $\lambda_{\text{exc}} = 420$  nm,  $T = 298$  K) at various concentrations of BIH (indicated in the figure).

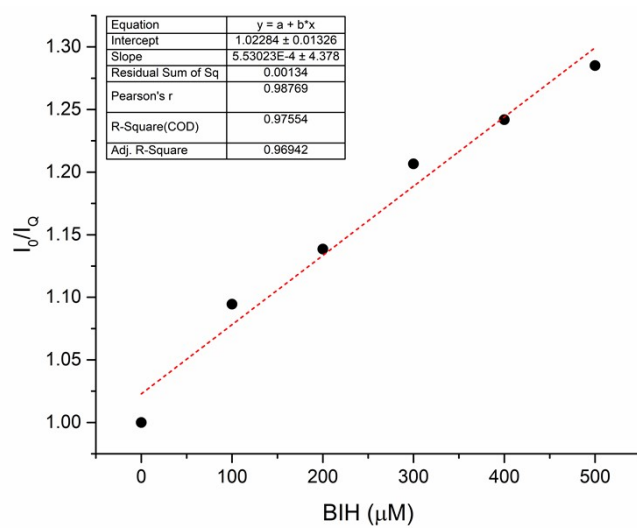

Figure S19: Stern-Volmer plots for  $[\text{Ir}(\text{dtbbpy})(\text{ppy})_2](\text{PF}_6)$  quenching with BIH.

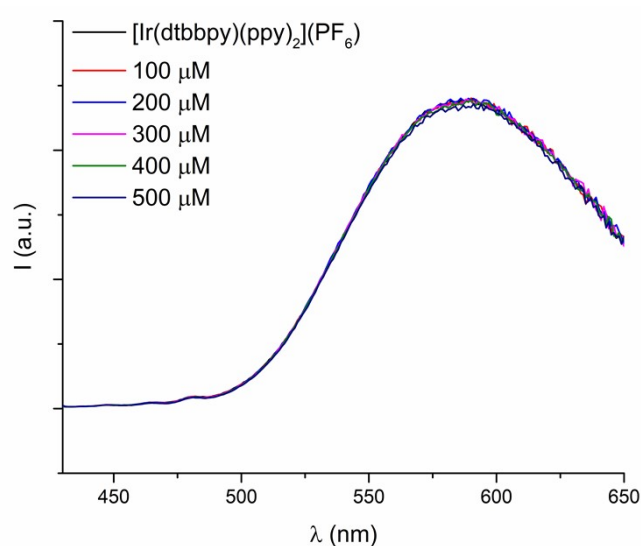

Figure S20: Normalized emission spectra of  $[\text{Ir}(\text{dtbbpy})(\text{ppy})_2](\text{PF}_6)$  ( $2.5 \times 10^{-5} \text{ M}$ ) in MeCN ( $\lambda_{\text{exc}} = 420 \text{ nm}$ ,  $T = 298 \text{ K}$ ) at various concentrations of  $^5[\text{Fe}^{\text{II}}(\text{NP}^{\text{iso}})(\text{Cl})](\text{BPh}_4)$  (indicated in the figure).

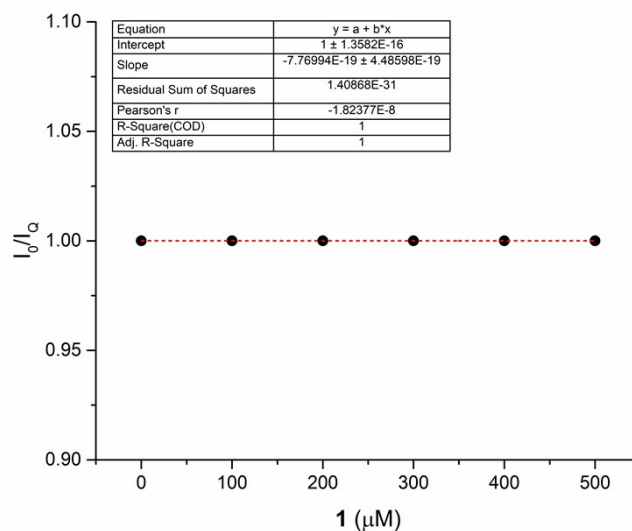

Figure S21: Stern-Volmer plots for  $[\text{Ir}(\text{dtbbpy})(\text{ppy})_2](\text{PF}_6)$  quenching with  $^5[\text{Fe}^{\text{II}}(\text{NP}^{\text{iso}})(\text{Cl})](\text{BPh}_4)$ .

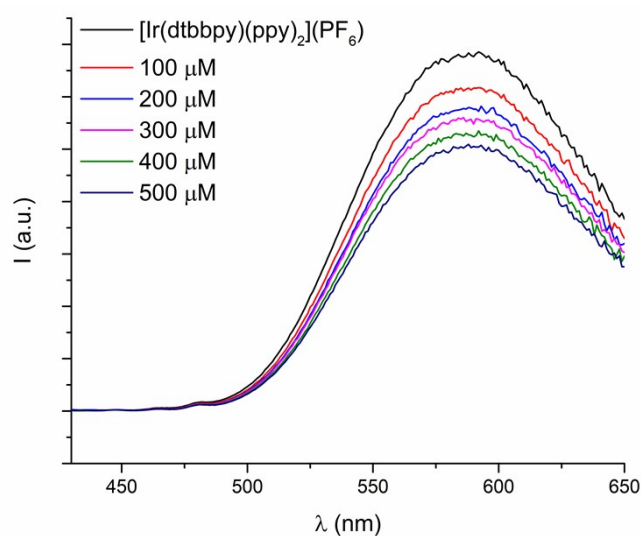

Figure S22: Normalized emission spectra of  $[\text{Ir}(\text{dtbbpy})(\text{ppy})_2](\text{PF}_6)$  ( $2.5 \times 10^{-5}$  M) in MeCN ( $\lambda_{\text{exc}} = 420$  nm,  $T = 298$  K) at various concentrations of TTA (indicated in the figure).

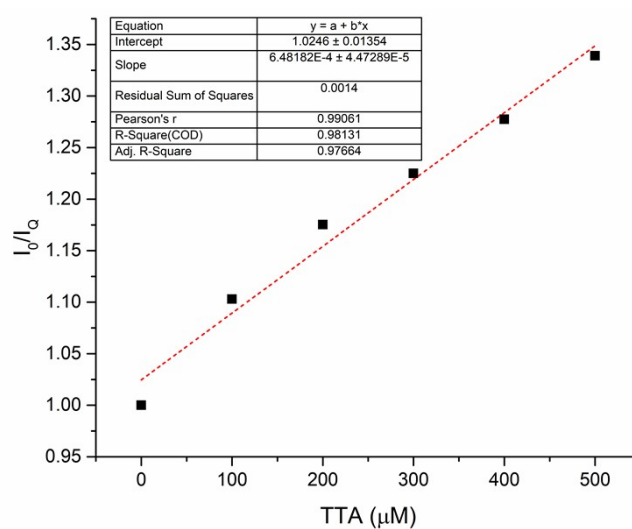

Figure S23: Stern-Volmer plots for  $[\text{Ir}(\text{dtbbpy})(\text{ppy})_2](\text{PF}_6)$  quenching with TTA.

## 8.2. FTIR spectroelectrochemical studies

### Electrochemical procedures

SEC-IR experiments were performed using a cell acquired from OTTLE. This cell has two platinum grids as working and counter electrodes and an Ag wire as the pseudo-reference electrode. A CO<sub>2</sub> or N<sub>2</sub> saturated MeCN or DCE/MeCN solution with 5 mM <sup>5</sup>[Fe<sup>II</sup>(NP<sup>iso</sup>)(Cl)](BPh<sub>4</sub>) and 0.1 M TBAPF<sub>6</sub> was injected in the SEC-IR cell. The studies performed using DCE/MeCN solutions were performed adding 5 μL of MeCN in a 5 mM solution of <sup>5</sup>[Fe<sup>II</sup>(NP<sup>iso</sup>)(Cl)](BPh<sub>4</sub>) in 5 mL of DCE. A linear voltammogram was performed using a scan rate of 10 mV s<sup>-1</sup> to reach the suitable potential. The IR spectra were obtained using a Bruker INVENIO S FTIR spectrometer with a resolution of 4 cm<sup>-1</sup> after 32 scans between 2200–1600 cm<sup>-1</sup>. The background spectrum was performed with the sample at the open circuit potential.

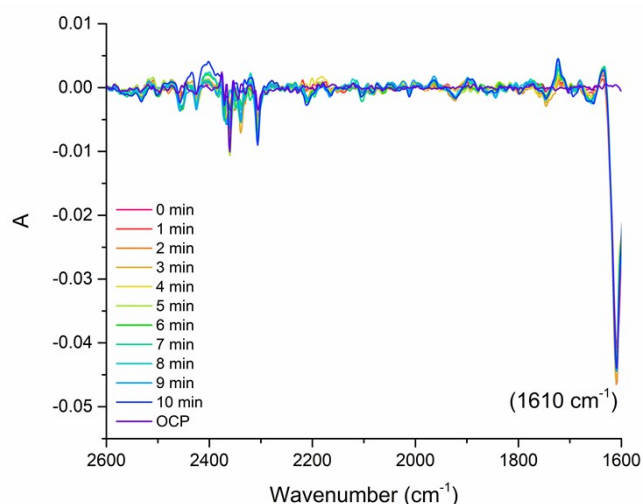

Figure S24: SEC-IR experiment at -1.65 V vs. Ag pseudo-reference under a N<sub>2</sub> atmosphere using 5 mM of <sup>5</sup>[Fe<sup>II</sup>(NP<sup>iso</sup>)(Cl)](BPh<sub>4</sub>) and 0.1 M TBAPF<sub>6</sub> in a N<sub>2</sub> saturated DCE/MeCN solution, Pt grids as working and counter electrodes and Ag wire as a pseudo-reference electrode.

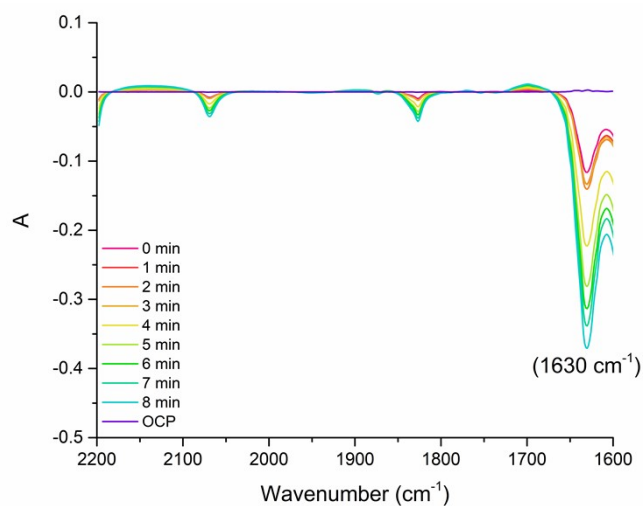

Figure S25: SEC-IR experiment at -1.45 V vs. Ag pseudo-reference under a CO<sub>2</sub> atmosphere using 5 mM of <sup>5</sup>[Fe<sup>II</sup>(NP<sup>iso</sup>)(Cl)](BPh<sub>4</sub>) and 0.1 M TBAPF<sub>6</sub> in a CO<sub>2</sub> saturated MeCN solution, Pt grids as working and counter electrodes and Ag wire as a pseudo-reference electrode.

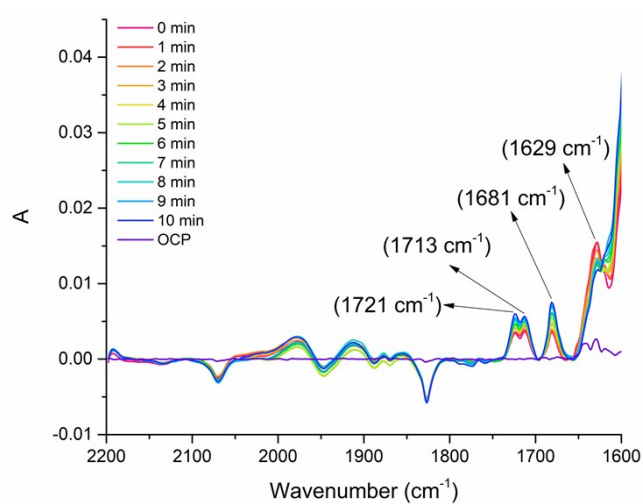

Figure S26: SEC-IR experiment at -1.85 V vs. Ag pseudo-reference under a N<sub>2</sub> atmosphere using 5 mM of <sup>5</sup>[Fe<sup>II</sup>(N<sup>P</sup><sub>iso</sub>)(Cl)](BPh<sub>4</sub>) and 0.1 M TBAPF<sub>6</sub> in a N<sub>2</sub> saturated MeCN solution, Pt grids as working and counter electrodes and Ag wire as a pseudo-reference electrode.

### 8.3. Electrospray Ionization Mass spectrometry (ESI-MS) solution studies

All MS data were collected using a Q-trap, time-of-flight MS (Maxis Impact MS) instrument supplied by Bruker Daltonics Ltd. The detector was a time-of-flight, micro-channel plate detector and all data was processed using the Bruker Daltonics Data Analysis 4.1 software, whilst simulated isotope patterns were investigated using Bruker Isotope Pattern software and Molecular Weight Calculator 6.45. The calibration solution used was Agilent ES tuning mix solution, Recorder No. G2421A, enabling calibration between approximately 100  $m/z$  and 2000  $m/z$ . This solution was diluted 60:1 with MeCN. The reaction mixture was introduced into the MS *via* direct injection at 180  $\mu\text{L h}^{-1}$ . The ion polarity for all MS scans recorded was positive, at 180  $^{\circ}\text{C}$ , with the voltage of the capillary tip set at 4000 V, endplate offset at  $-500$  V, funnel 1 RF at 300 Vpp and funnel 2 RF at 400 Vpp.

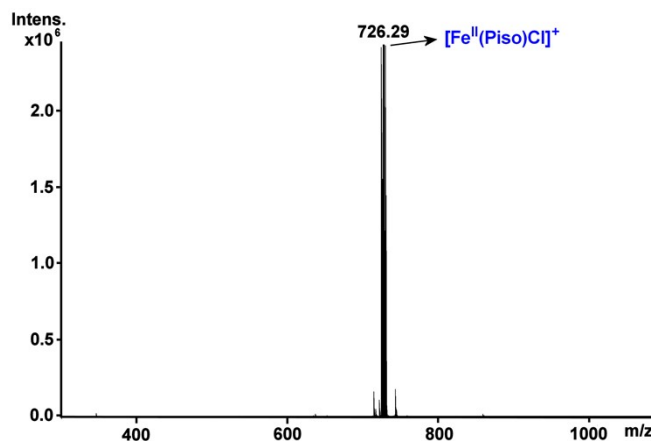

Figure S27: Positive ion mass spectrum of  $^5[\text{Fe}^{\text{II}}(\text{NP}^{\text{iso}})(\text{Cl})](\text{BPh}_4)$  in MeCN. The isotopic distribution envelope correspond to singly charged species centred at 726.29  $m/z$  and can be attributed to the  $\{\text{FeN}(\text{C}_{13}\text{H}_{20}\text{P})_3\text{Cl}\}^+$  iron species.

Table S4: Representation of the experimentally identified and simulated m/z values of distribution envelopes of catalytic mixture after 4 h of irradiation, using a MeCN:H<sub>2</sub>O (4.5:0.5) solvent mixture as eluent.

| Exp.    | Theor.  | +v | Formula                                                                                                                                         |
|---------|---------|----|-------------------------------------------------------------------------------------------------------------------------------------------------|
| 690.40  | 690.38  | +1 | {Fe <sup>I</sup> (P <sup>iso</sup> )} <sup>+</sup>                                                                                              |
| 773.30  | 773.15  | +1 | {[Fe <sup>I</sup> (P <sup>iso</sup> )CH <sub>3</sub> CN]•CH <sub>3</sub> CN } <sup>+</sup>                                                      |
| 817.30  | 817.14  | +1 | {[Fe <sup>I</sup> (P <sup>iso</sup> )CO <sub>2</sub> ](CH <sub>3</sub> CN) <sub>2</sub> } <sup>+</sup>                                          |
| 879.30  | 879.20  | +1 | {[Fe <sup>I</sup> (P <sup>iso</sup> )CO <sub>2</sub> ](H <sub>2</sub> O) <sub>4</sub> (HCl) <sub>2</sub> } <sup>+</sup>                         |
| 923.30  | 923.32  | +1 | {Ir(C <sub>40</sub> H <sub>40</sub> N <sub>4</sub> )(CH <sub>3</sub> CN) <sub>2</sub> (H <sub>2</sub> O) <sub>2</sub> (HCl)} <sup>+</sup>       |
| 995.40  | 995.32  | +1 | {Ir(C <sub>40</sub> H <sub>39</sub> N <sub>4</sub> )(CH <sub>3</sub> CN) <sub>2</sub> PF <sub>6</sub> } <sup>+</sup>                            |
| 1039.40 | 1040.15 | +1 | {[Fe <sup>III</sup> (P <sup>iso</sup> )COCl <sub>2</sub> ](CH <sub>3</sub> CN) <sub>3</sub> (H <sub>2</sub> O) <sub>5</sub> (HCl)} <sup>+</sup> |

## 9. Additional Computational Data

### 9.1 Electronic structure of initial species

Initially, the 3d orbital splitting was examined in both the  $^5[\text{Fe}^{\text{II}}(\text{NP}^{\text{iso}})(\text{Cl})]^+$  and  $[\text{Fe}^{\text{II}}(\text{NP}^{\text{iso}})(\text{NCMe})]^{2+}$  complexes in order to compare them. These are displayed in Figure S31. Both complexes were optimized in the quintet state since the ligands are either weak- or mid-field and the similarity to the tetrahedral steric arrangement both point to a high spin solution.<sup>10-33</sup>

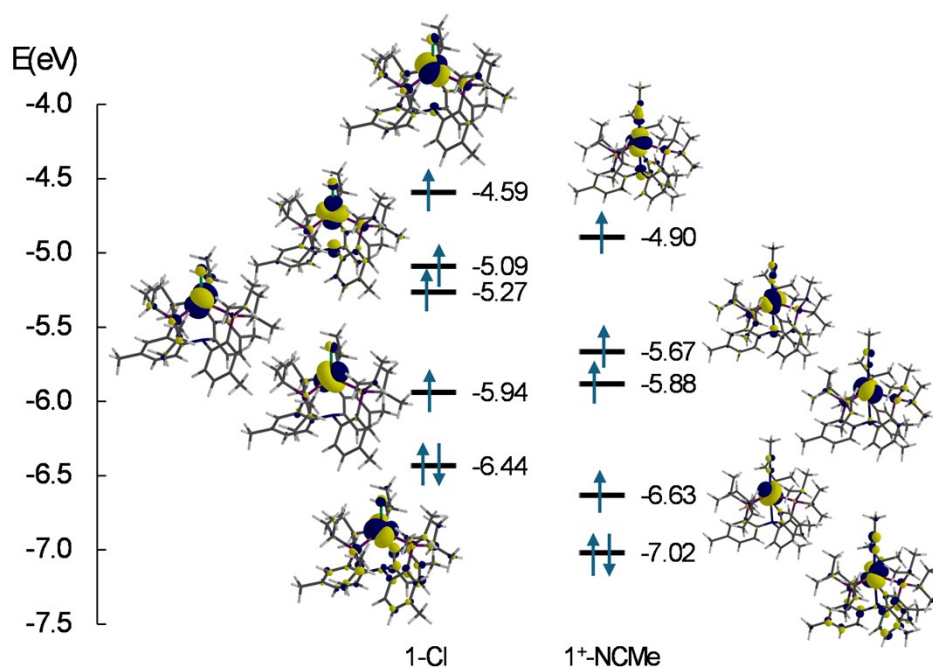

Figure S28: Kohn-Sham quasi-restricted molecular orbital comparison between complexes  $^5[\text{Fe}^{\text{II}}(\text{NP}^{\text{iso}})(\text{Cl})]^+$  (left) and  $[\text{Fe}^{\text{II}}(\text{NP}^{\text{iso}})(\text{NCMe})]^{2+}$  (right).

The most noticeable difference between  $^5[\text{Fe}^{\text{II}}(\text{NP}^{\text{iso}})(\text{Cl})]^+$  and  $[\text{Fe}^{\text{II}}(\text{NP}^{\text{iso}})(\text{NCMe})]^{2+}$  lies in the clustering of the 3d levels in accordance to a pseudo-tetrahedral ligand field  $e^3 t_2^3$  ( $T_d$  point group) in

the case of the former but the latter is more in the pattern of a pseudo-trigonal bipyramid ( $e''$ )<sup>3</sup> ( $e'$ )<sup>2</sup> ( $a_1'$ )<sup>1</sup> ( $D_{5h}$  point group).

Since  $[\text{Fe}^{\text{II}}(\text{NP}^{\text{iso}})(\text{NCMe})]^{2+}$  is more cationic, the metal center will draw the axial nitrogen nearer. This difference is seen in the optimized distances where the Fe-N distance is close to 2.6 Å whereas in the neutral  $^5[\text{Fe}^{\text{II}}(\text{NP}^{\text{iso}})(\text{Cl})]^+$  complex it is close to 0.2 Å longer (Figure S32).

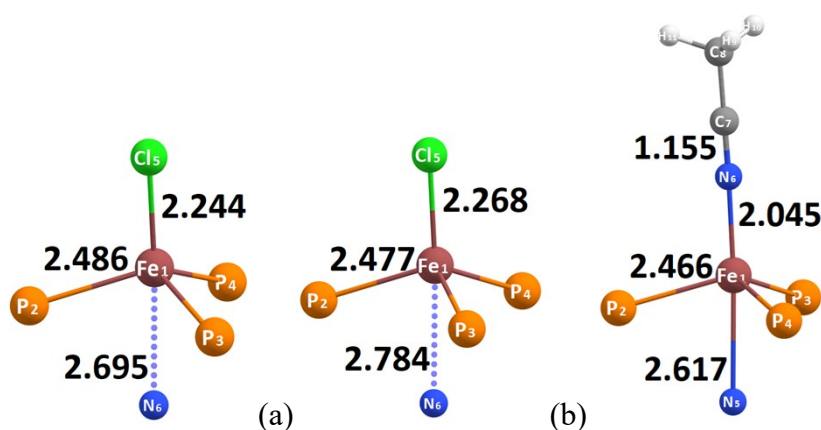

Figure S29: Essential bond lengths of the crystal structure of  $^5[\text{Fe}^{\text{II}}(\text{NP}^{\text{iso}})(\text{Cl})](\text{BPh}_4)$  (a) and optimized structures of  $^5[\text{Fe}^{\text{II}}(\text{NP}^{\text{iso}})(\text{Cl})]^+$  (b) and  $^5[\text{Fe}^{\text{II}}(\text{NP}^{\text{iso}})(\text{NCMe})]^{2+}$  (c) highlighting the Fe-N internuclear distances in Å. Atoms in the second coordination sphere are omitted for clarity.

## 9.2 Reduction potential calculations

While the presence in solution of the  $[\text{Fe}^{\text{II}}(\text{NP}^{\text{iso}})(\text{NCMe})]^{2+}$  species in the Fe(II) oxidation state should only be residual given that its formation is endergonic the reduction wave shows up above the detection limit of the cyclic voltametric experiment. The remainder Fe(I)/Fe(0) pairs are estimated to be beyond -3.4 V.

Table S5: Calculated half pair reduction potentials and their assignment to the experimental values.

| Redox pair                                                                                                                                          | Calc. $E^\ominus$<br>(vs $\text{Fc}^+/\text{Fc}$ )/V | Exp. $E^\ominus$<br>(vs $\text{Fc}^+/\text{Fc}$ )/V |
|-----------------------------------------------------------------------------------------------------------------------------------------------------|------------------------------------------------------|-----------------------------------------------------|
| $[\text{Fe}^{\text{II}}(\text{NP}^{\text{iso}})(\text{Cl})]^+ + e^- \rightarrow [\text{Fe}^{\text{I}}(\text{NP}^{\text{iso}})(\text{Cl})]^0$        | -2.19                                                | -2.17                                               |
| $[\text{Fe}^{\text{II}}(\text{NP}^{\text{iso}})(\text{NCMe})]^{2+} + e^- \rightarrow [\text{Fe}^{\text{I}}(\text{NP}^{\text{iso}})(\text{NCMe})]^+$ | -1.54                                                | -1.53                                               |
| $[\text{Fe}^{\text{I}}(\text{NP}^{\text{iso}})(\text{Cl})]^0 + e^- \rightarrow [\text{Fe}^0(\text{NP}^{\text{iso}})(\text{Cl})]^-$                  | -3.67                                                | —                                                   |
| $[\text{Fe}^{\text{I}}(\text{NP}^{\text{iso}})(\text{NCMe})]^+ + e^- \rightarrow [\text{Fe}^0(\text{NP}^{\text{iso}})(\text{NCMe})]^0$              | -3.49                                                | —                                                   |

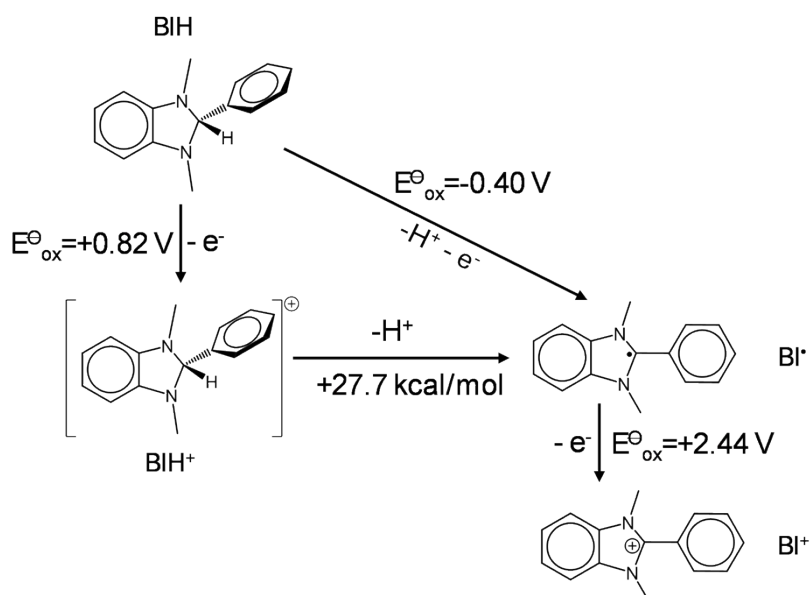

Figure S30: Oxidation potentials of the sacrificial reagent BIH with and without proton coupled steps.

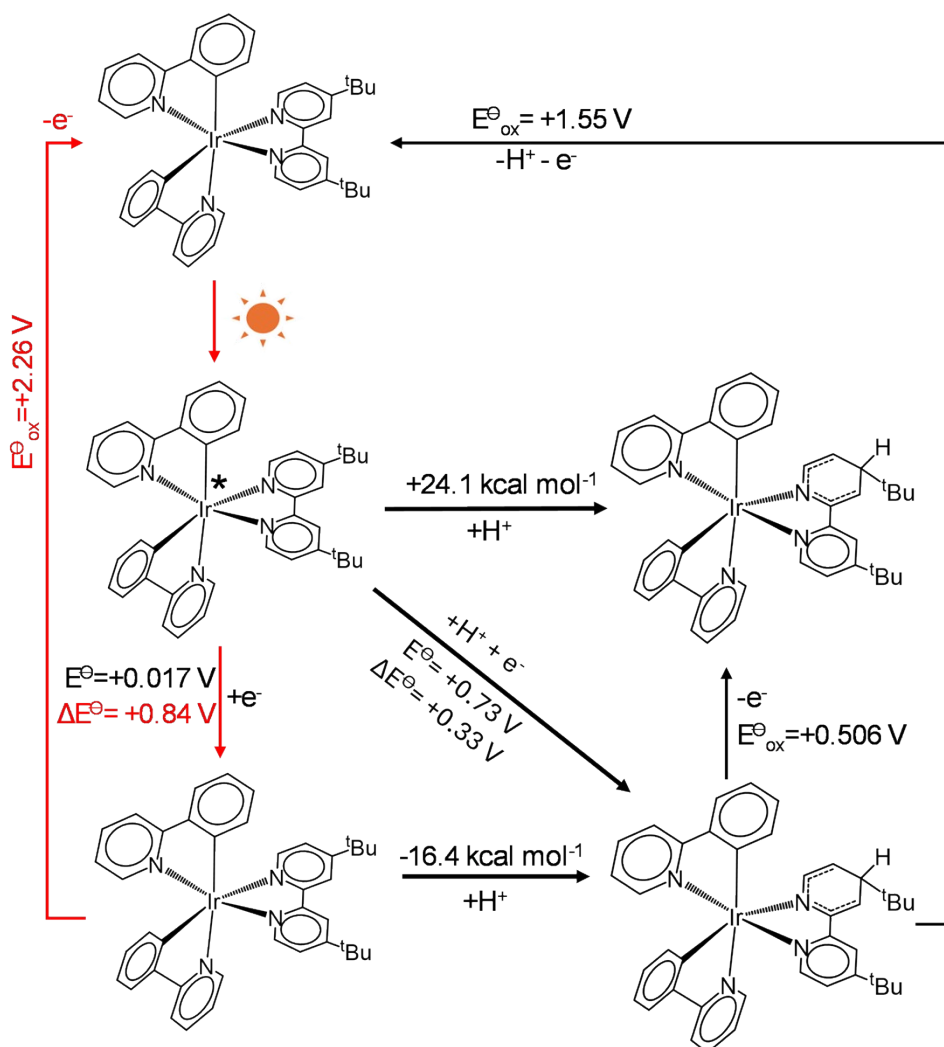

Figure S31: Calculated redox potentials (vs.  $\text{Fc}/\text{Fc}^+$ ) for the  $[\text{Ir}(\text{ppy})_2(\text{dtb-bpy})]^+$  complex. Difference in reduction potentials are calculated with respect to the proton coupled step of BIH ( $E_{\text{ox}}^\ominus = -0.40 \text{ V}$ ) and single electron transfer ( $E_{\text{ox}}^\ominus = +0.82 \text{ V}$ ) at the appropriate steps. Most favorable pathway using BIH as an electron donor is signaled in red.

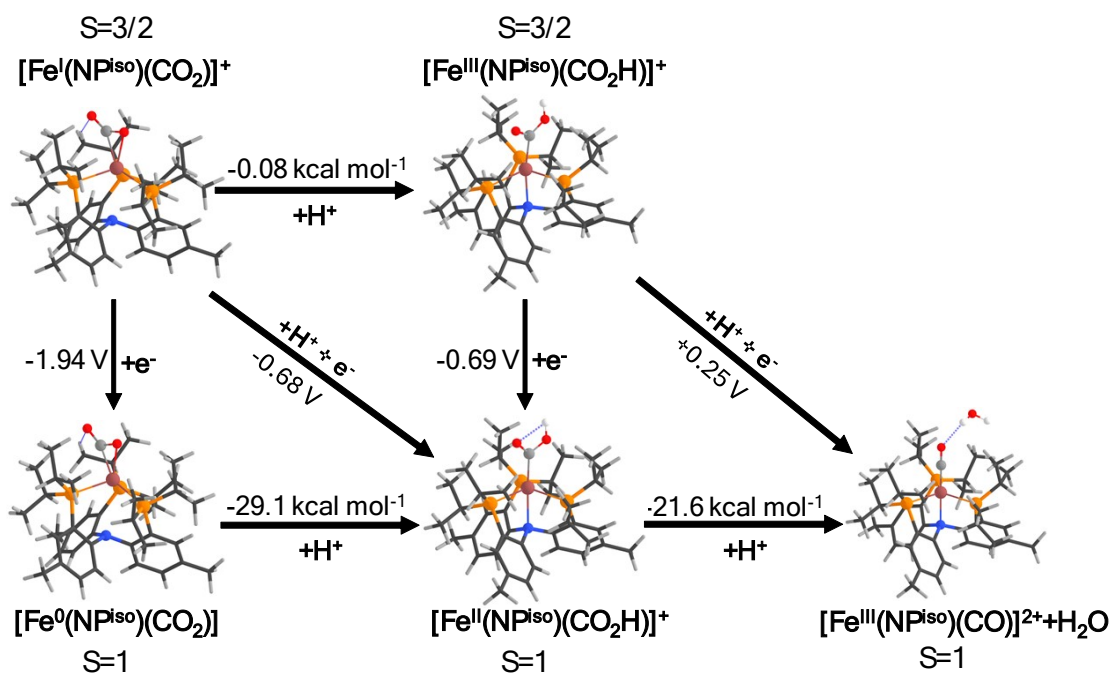

Figure S32: Calculated molecular Pourbaix diagram of the several stages of reduction of the  $\text{CO}_2$  adduct complex and the respective oxidation states of the iron center.

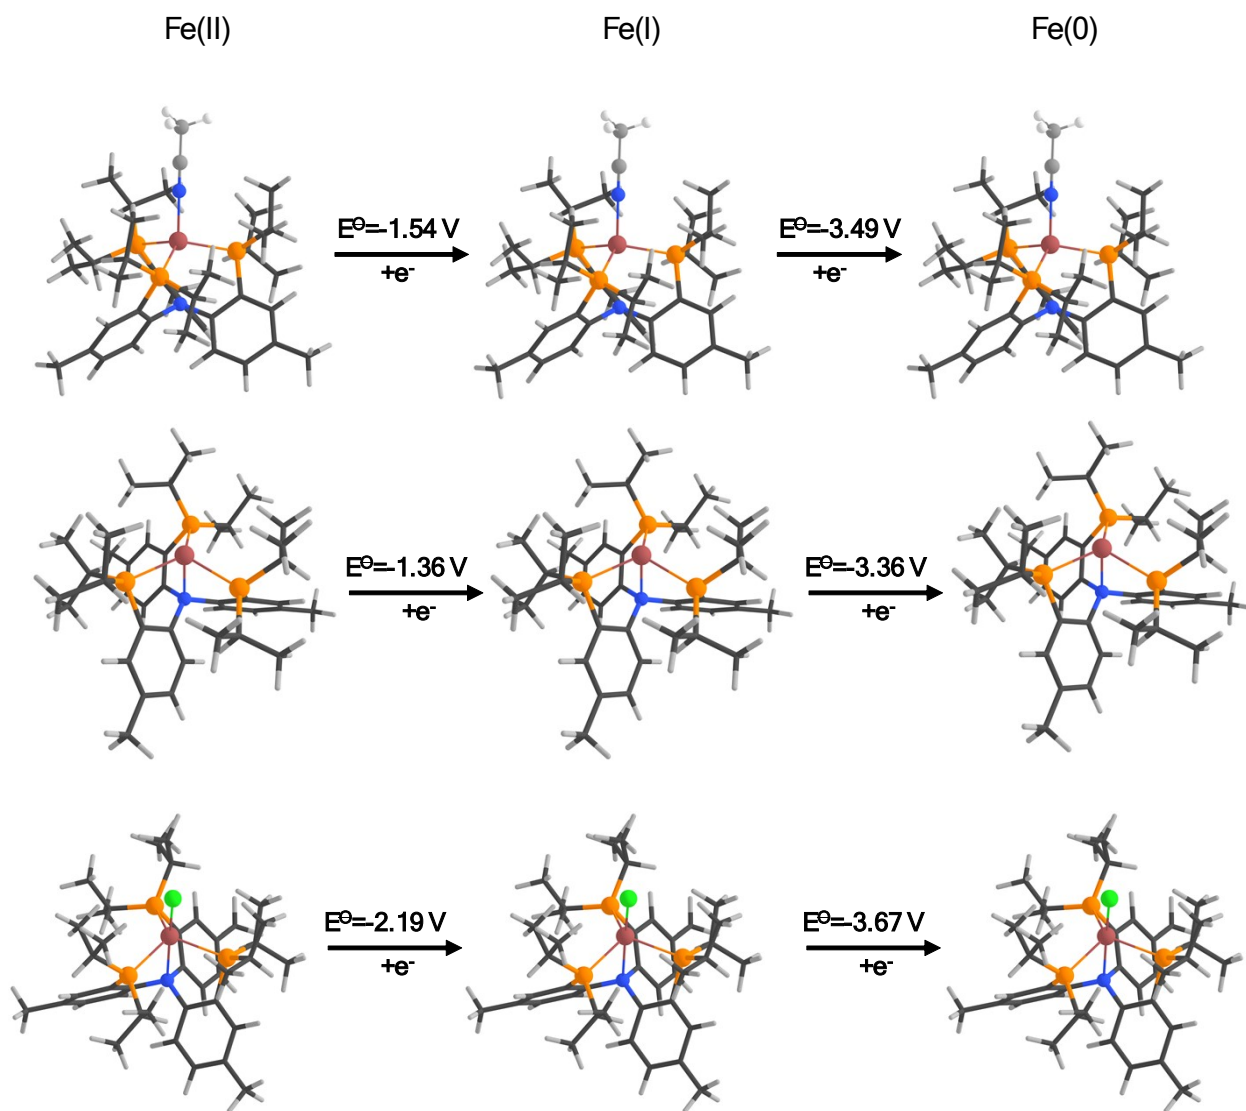

Figure S33: Calculated redox potentials for the non-coordinate, chloro and acetonitrile complexes.

### 9.3 Electronic structure of intermediates

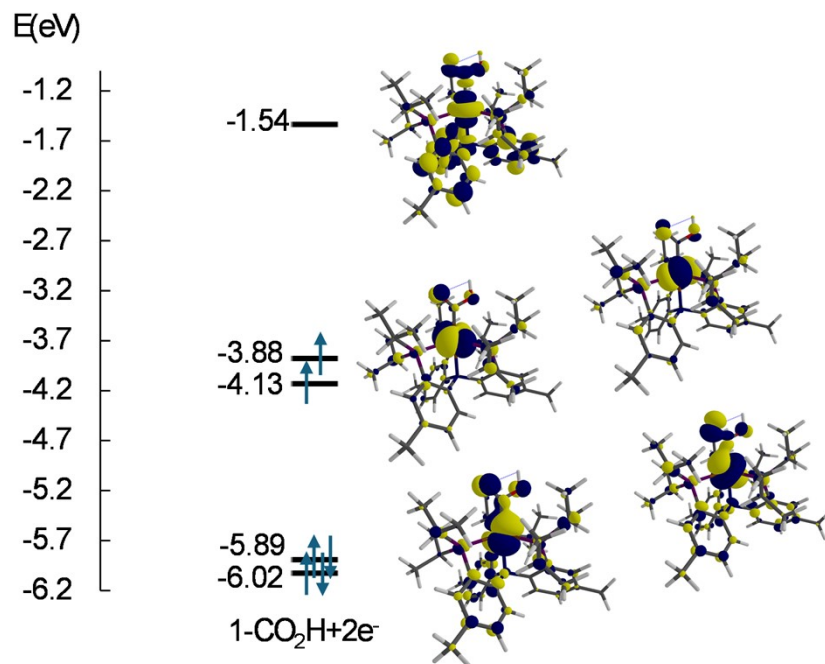

Figure S34: Ligand field splitting (quasi-restricted molecular orbitals) in the doubly reduced species  ${}^3[\text{Fe}^{\text{II}}(\text{NP}^{\text{iso}})(\text{CO}_2\text{H})]^+$ . Note that the complex is still  $3\text{d}^6$  i.e. Fe(II). As the total charge of the complex is +1 it may be concluded that the ligand bears a  $[\text{:CO}_2\text{H}]^-$  formal charge.

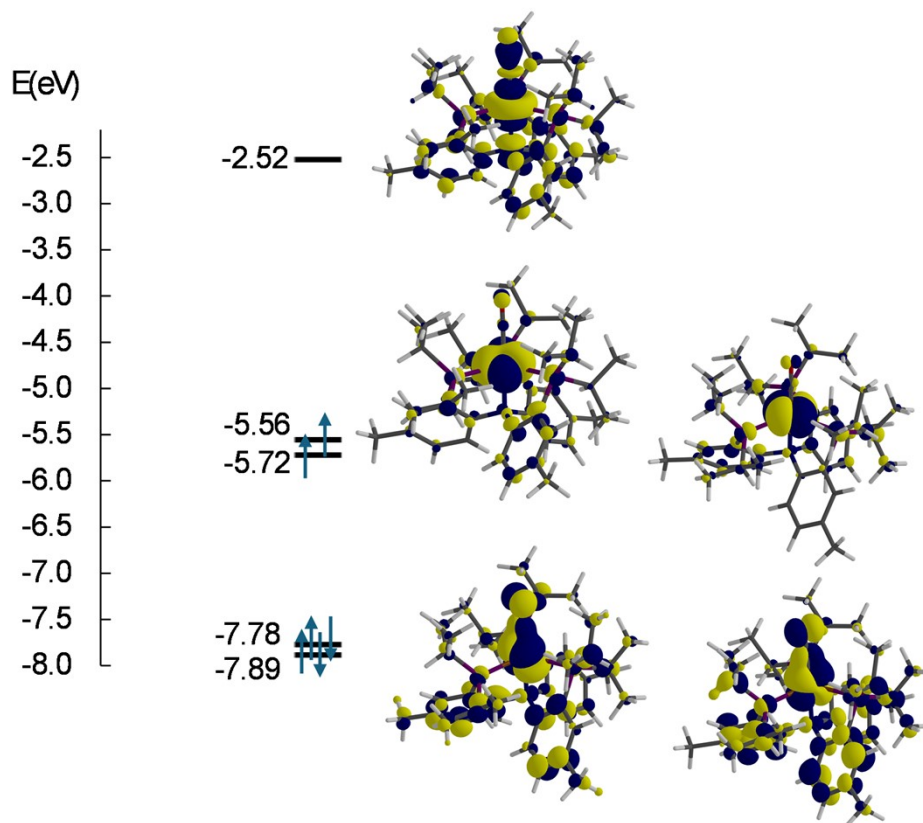

Figure S35: Ligand field splitting (quasi-restricted molecular orbitals) in the doubly reduced species  $^3[\text{Fe}^{\text{II}}(\text{NP}^{\text{iso}})(\text{CO})]^{2+}$ .

A natural bond orbital analysis<sup>34-36</sup> was carried out on the  $[\text{Fe}^{\text{II}}(\text{NP}^{\text{iso}})(\text{CO}_2\text{H})]^+$  and  $[\text{Fe}^{\text{II}}(\text{NP}^{\text{iso}})(\text{CO})]^{2+}$  species, in particular the composition of the natural localized molecular orbitals to assess the amount of  $\sigma$   $\text{M} \leftarrow \text{L}$  bonding donation and  $\pi$   $\text{M} \rightarrow \text{L}$  backbonding between the iron center and the carbonite and carbonyl ligands. The carbonite complex may only exhibit backbonding through the plane that is perpendicular to the ligand (see NLMOs below in Figure S40). As such the electron donation will be less. The overall results are displayed below (Table S7).

Table S6: Electron donation and backdonation from the population analysis of NLMOs. The electronic donor acceptor values are normalised to two electrons per bond.

| Donor-acceptor NLMOs                                                     | M←L $\sigma$ NLMOs ( $\alpha+\beta$ ) | M→L $\pi$ NLMOs ( $\alpha+\beta$ ) |
|--------------------------------------------------------------------------|---------------------------------------|------------------------------------|
| $[\text{Fe}^{\text{II}}(\text{NP}^{\text{iso}})(\text{CO}_2\text{H})]^+$ | 0.68e <sup>-</sup>                    | 0.084e <sup>-</sup>                |
| $[\text{Fe}^{\text{II}}(\text{NP}^{\text{iso}})(\text{CO})]^{2+}$        | 0.62e <sup>-</sup>                    | 0.11e <sup>-</sup>                 |
|                                                                          |                                       | 0.11e <sup>-</sup>                 |

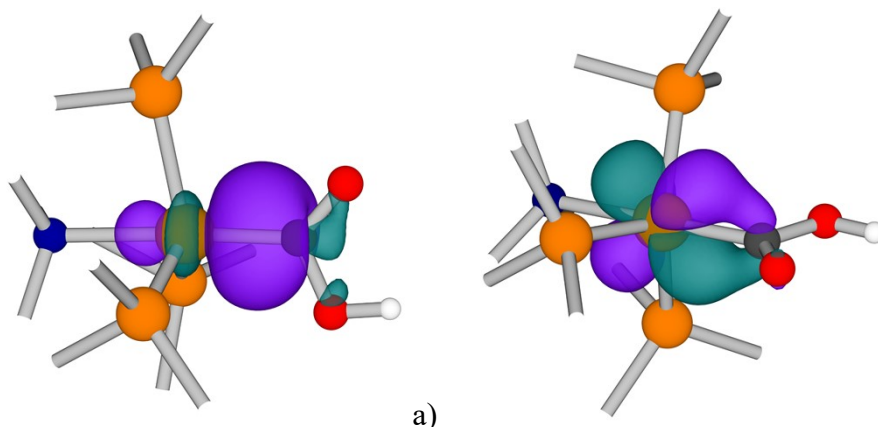

Figure S36: NLMOs of the  $^3[\text{Fe}^{\text{II}}(\text{NP}^{\text{iso}})(\text{CO}_2\text{H})]^+ + 2e^-$  intermediate showing the detail of the a)  $\sigma$  iron-carbanionic bond and b) the  $\pi$  backbonding component of the  $\text{CO}_2\text{H}$  ligand.

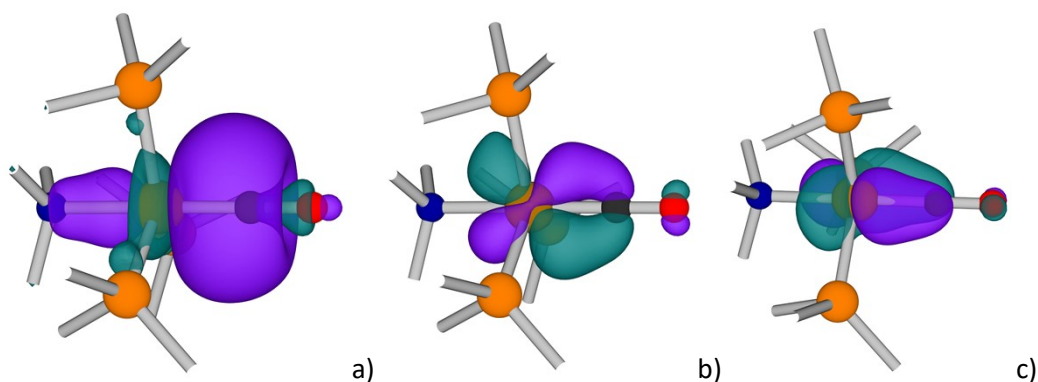

Figure S37: NLMOs of the  $^3[\text{Fe}^{\text{II}}(\text{NP}^{\text{iso}})(\text{CO})]^{2+}$  intermediate.

## 10. References:

- (1) W. L. F. Armarego and D. D. Perrin, Purification of laboratory chemicals, 4<sup>th</sup> edn, Elsevier, Butterworth-Heinemann, 1997, ISBN: 0750637617.
- (2) S. Engle, Preparation of 2,4,5,6-tetra(9H-carbazol-9-yl)isophthalonitrile, *Org. Synth.*, 2019, **96**, 455–473, DOI: 10.15227/orgsyn.096.0455.
- (3) C. E. MacBeth, S. B. Harkins and J. C. Peters, Synthesis and characterization of cationic iron complexes supported by the neutral ligands  $\text{NP}^{i\text{-Pr}}_3$ ,  $\text{NArP}^{i\text{-Pr}}_3$  and  $\text{NS}^{t\text{-Bu}}_3$ , *Can. J. Chem.*, 2005, **83**, 332–340, DOI: 10.1139/v05-017.
- (4) J. A. Knöller, G. Meng, X. Wang, D. Hall, A. Pershin, D. Beljonne, Y. Olivier, S. Laschat, E. Zysman-Colman and S. Wang, Intramolecular borylation via sequential B–Mes bond cleavage for the divergent synthesis of B,N,B-doped benzo[4]helicenes, *Angew. Chem.*, 2020, **132**, 3181–3185, DOI: 10.1002/ange.201912340.
- (5) Y. Wu, D. Kim and T. S. Teets, Photophysical properties and redox potentials of photosensitizers for organic photoredox transformations, *Synlett*, 2022, **33**, 1154–1179, DOI: 10.1055/a-1390-9065.
- (6) P. G. Alsabeh, A. Rosas-Hernández, E. Barsch, H. Junge, R. Ludwig and M. Beller, Iron-catalyzed photoreduction of carbon dioxide to synthesis gas, *Catal. Sci. Technol.*, 2016, **6**, 3623–3630, DOI: 10.1039/c5cy01129a.
- (7) A. J. Morris, G. J. Meyer and E. Fujita, Molecular approaches to the photocatalytic reduction of carbon dioxide for solar fuels, *Acc. Chem. Res.*, 2009, **42**, 1983–1994, DOI: 10.1021/ar9001679.
- (8) S. Kozuch and J. M. L. Martin, “Turning over” definitions in catalytic cycles, *ACS Catal.*, 2012, **2**, 2787–2794, DOI: 10.1021/cs3005264.
- (9) Y. Wu, D. Kim and T. S. Teets, Photophysical properties and redox potentials of photosensitizers for organic photoredox transformations, *Synlett*, 2022, **33**, 1154–1179, DOI: 10.1055/a-1390-9065.

- (10) F. Neese, The ORCA program system, *WIREs Comput. Mol. Sci.*, 2012, **2**, 73–78, DOI: 10.1002/wcms.81.
- (11) F. Neese, Software update: the ORCA program system, version 4.0, *WIREs Comput. Mol. Sci.*, 2018, **8**, e1327, DOI: 10.1002/wcms.1327.
- (12) F. Neese, F. Wennmohs, U. Becker and C. Riplinger, The ORCA quantum chemistry program package, *J. Chem. Phys.*, 2020, **152**, 224108, DOI: 10.1063/5.0004608.
- (13) F. Neese, Software update: the ORCA program system—version 6.0, *WIREs Comput. Mol. Sci.*, 2025, **15**, e70019, DOI: 10.1002/wcms.70019.
- (14) C. Adamo and V. Barone, Exchange functionals with improved long-range behavior and adiabatic connection methods without adjustable parameters: the mPW and mPW1PW models, *J. Chem. Phys.*, 1998, **108**, 664–675, DOI: 10.1063/1.475428.
- (15) C. Adamo and V. Barone, Toward chemical accuracy in the computation of NMR shieldings: the PBE0 model, *Chem. Phys. Lett.*, 1998, **298**, 113–119, DOI: 10.1016/S0009-2614(98)01201-9.
- (16) E. Caldeweyher, C. Bannwarth and S. Grimme, Extension of the D3 dispersion coefficient model, *J. Chem. Phys.*, 2017, **147**, 034112, DOI: 10.1063/1.4993215.
- (17) F. Neese, An improvement of the resolution of the identity approximation for the formation of the Coulomb matrix, *J. Comput. Chem.*, 2003, **24**, 1740–1747, DOI: 10.1002/jcc.10318.
- (18) F. Neese, F. Wennmohs, A. Hansen and U. Becker, Efficient, approximate and parallel Hartree–Fock and hybrid DFT calculations: a ‘chain-of-spheres’ algorithm for the Hartree–Fock exchange, *Chem. Phys.*, 2009, **356**, 98–109, DOI: 10.1016/j.chemphys.2008.10.036.

- (19) S. Kossmann and F. Neese, Comparison of two efficient approximate Hartree–Fock approaches, *Chem. Phys. Lett.*, 2009, **481**, 240–243, DOI: 10.1016/j.cplett.2009.09.073.
- (20) B. Helmich-Paris, B. Souza, F. Neese and R. Izsák, An improved chain of spheres for exchange algorithm, *J. Chem. Phys.*, 2021, **155**, 104109, DOI: 10.1063/5.0058766.
- (21) F. Neese, The SHARK integral generation and digestion system, *J. Comput. Chem.*, 2023, **44**, 381–396, DOI: 10.1002/jcc.26942.
- (22) F. Weigend, Accurate Coulomb-fitting basis sets for H to Rn, *Phys. Chem. Chem. Phys.*, 2006, **8**, 1057–1065, DOI: 10.1039/b515623h.
- (23) V. Barone and M. Cossi, Quantum calculation of molecular energies and energy gradients in solution by a conductor solvent model, *J. Phys. Chem. A*, 1998, **102**, 1995–2001, DOI: 10.1021/jp9716997.
- (24) M. Garcia-Ratés and F. Neese, Efficient implementation of the analytical second derivatives of Hartree–Fock and hybrid DFT energies within the framework of the conductor-like polarizable continuum model, *J. Comput. Chem.*, 2019, **40**, 1816–1828, DOI: 10.1002/jcc.25833.
- (25) M. Garcia-Ratés and F. Neese, Effect of the solute cavity on the solvation energy and its derivatives within the framework of the Gaussian charge scheme, *J. Comput. Chem.*, 2020, **41**, 922–939, DOI: 10.1002/jcc.26139.
- (26) S. Grimme, Supramolecular binding thermodynamics by dispersion-corrected density functional theory, *Chem. Eur. J.*, 2012, **18**, 9955–9964, DOI: 10.1002/chem.201200497.
- (27) F. Neese, A. Hansen and D. G. Liakos, Efficient and accurate approximations to the local coupled cluster singles doubles method using a truncated pair natural orbital basis, *J. Chem. Phys.*, 2009, **131**, 064103, DOI: 10.1063/1.3173827.

- (28) F. Neese, F. Wennmohs and A. Hansen, Efficient and accurate local approximations to coupled-electron pair approaches: an attempt to revive the pair natural orbital method, *J. Chem. Phys.*, 2009, **130**, 114108, DOI: 10.1063/1.3086717.
- (29) A. Hansen, D. G. Liakos and F. Neese, Efficient and accurate local single reference correlation methods for high-spin open-shell molecules using pair natural orbitals, *J. Chem. Phys.*, 2011, **135**, 214102, DOI: 10.1063/1.3663855.
- (30) C. Riplinger and F. Neese, An efficient and near linear scaling pair natural orbital based local coupled cluster method, *J. Chem. Phys.*, 2013, **138**, 034106, DOI: 10.1063/1.4773581.
- (31) C. Riplinger, P. Pinski, U. Becker, E. F. Valeev and F. Neese, Sparse maps—a systematic infrastructure for reduced-scaling electronic structure methods: II. linear scaling domain based pair natural orbital coupled cluster theory, *J. Chem. Phys.*, 2016, **144**, 024109, DOI: 10.1063/1.4939030.
- (32) V. V. Pavlishchuk and A. W. Addison, Conversion constants for redox potentials measured versus different reference electrodes in acetonitrile solutions at 25 °C, *Inorg. Chim. Acta*, 2000, **298**, 97–102, DOI: 10.1016/S0020-1693(99)00407-7.
- (33) H. Farrokhpour and M. Manassir, Approach for predicting the standard free energy solvation of H<sup>+</sup> and acidity constant in nonaqueous organic solvents, *J. Chem. Eng. Data*, 2014, **59**, 3555–3564, DOI: 10.1021/je500459x.
- (34) E. D. Glendening, C. R. Landis and F. Weinhold, NBO 7.0: new vistas in localized and delocalized chemical bonding theory, *J. Comput. Chem.*, 2019, **40**, 2234–2241, DOI: 10.1002/jcc.25873.
- (35) E. D. Glendening, C. R. Landis and F. Weinhold, Natural bond orbital methods, *WIREs Comput. Mol. Sci.*, 2012, **2**, 1–42, DOI: 10.1002/wcms.51.
- (36) A. E. Reed and F. Weinhold, Natural localized molecular orbitals, *J. Chem. Phys.*, 1985, **83**, 1736–1740, DOI: 10.1063/1.449360.

## 11. Optimized coordinates

/db/nbandeira/Fe(NPiso)/L=Cl/2e-/1-NCMe+Cl

Energy (POTENTIAL) = -4466.93296750 Eh

| Atom | X       | Y       | Z       |
|------|---------|---------|---------|
| 1 Fe | -0.3129 | 1.4417  | 2.7669  |
| 2 P  | -0.9836 | -0.6993 | 1.9499  |
| 3 P  | -1.9045 | 3.0661  | 2.1084  |
| 4 P  | 1.7728  | 2.0894  | 1.8001  |
| 5 N  | -0.5241 | 1.5020  | -0.1113 |
| 6 C  | 0.0754  | 0.2688  | -0.4646 |
| 7 C  | 0.8542  | 0.1820  | -1.6243 |
| 8 H  | 0.9914  | 1.0710  | -2.2378 |
| 9 C  | 1.4531  | -1.0244 | -1.9962 |
| 10 H | 2.0655  | -1.0651 | -2.8985 |
| 11 C | 1.2627  | -2.1774 | -1.2363 |
| 12 C | 0.4698  | -2.0789 | -0.0797 |
| 13 H | 0.3331  | -2.9798 | 0.5178  |
| 14 C | -0.1129 | -0.8775 | 0.3354  |
| 15 C | 1.8743  | -3.4941 | -1.6267 |
| 16 H | 2.5406  | -3.3845 | -2.4921 |
| 17 H | 1.1010  | -4.2317 | -1.8906 |
| 18 H | 2.4585  | -3.9257 | -0.8007 |
| 19 C | -1.9396 | 1.5903  | -0.2751 |
| 20 C | -2.5759 | 0.8821  | -1.2805 |
| 21 H | -1.9778 | 0.2325  | -1.9219 |
| 22 C | -3.9701 | 0.9855  | -1.4854 |
| 23 H | -4.4598 | 0.4044  | -2.2679 |
| 24 C | -4.7125 | 1.9177  | -0.7020 |
| 25 C | -4.0667 | 2.6455  | 0.2804  |
| 26 H | -4.6599 | 3.3523  | 0.8641  |
| 27 C | -2.6691 | 2.4836  | 0.5866  |
| 28 C | -6.1831 | 2.1005  | -0.9613 |
| 29 H | -6.3756 | 2.4463  | -1.9905 |
| 30 H | -6.6288 | 2.8315  | -0.2726 |
| 31 H | -6.7318 | 1.1512  | -0.8469 |
| 32 C | 0.2022  | 2.6773  | -0.4463 |
| 33 C | -0.2612 | 3.5064  | -1.4756 |
| 34 H | -1.1615 | 3.2096  | -2.0126 |

|    |   |         |         |         |
|----|---|---------|---------|---------|
| 35 | C | 0.3980  | 4.6863  | -1.7969 |
| 36 | H | 0.0112  | 5.3197  | -2.5971 |
| 37 | C | 1.5518  | 5.0685  | -1.1008 |
| 38 | C | 2.0048  | 4.2299  | -0.0784 |
| 39 | H | 2.8876  | 4.5462  | 0.4702  |
| 40 | C | 1.3492  | 3.0430  | 0.2805  |
| 41 | C | 2.2771  | 6.3412  | -1.4392 |
| 42 | H | 3.0949  | 6.5337  | -0.7330 |
| 43 | H | 1.5990  | 7.2065  | -1.4184 |
| 44 | H | 2.7099  | 6.2969  | -2.4500 |
| 45 | C | -0.3534 | -2.1789 | 2.9147  |
| 46 | H | -0.5184 | -3.0860 | 2.3144  |
| 47 | C | 1.1414  | -2.0000 | 3.1622  |
| 48 | H | 1.3154  | -1.1189 | 3.7959  |
| 49 | H | 1.7125  | -1.8677 | 2.2359  |
| 50 | H | 1.5464  | -2.8780 | 3.6882  |
| 51 | C | -1.0686 | -2.3568 | 4.2544  |
| 52 | H | -0.4886 | -3.0494 | 4.8837  |
| 53 | H | -2.0715 | -2.7801 | 4.1473  |
| 54 | H | -1.1735 | -1.4151 | 4.8099  |
| 55 | C | -2.7609 | -1.1067 | 1.4823  |
| 56 | H | -3.0725 | -0.1700 | 1.0009  |
| 57 | C | -2.8868 | -2.2291 | 0.4593  |
| 58 | H | -2.5142 | -3.1852 | 0.8581  |
| 59 | H | -2.3409 | -2.0069 | -0.4654 |
| 60 | H | -3.9470 | -2.3710 | 0.1962  |
| 61 | C | -3.6914 | -1.3660 | 2.6677  |
| 62 | H | -4.7271 | -1.1467 | 2.3672  |
| 63 | H | -3.4692 | -0.7610 | 3.5542  |
| 64 | H | -3.6630 | -2.4211 | 2.9710  |
| 65 | C | -3.3557 | 3.3588  | 3.2602  |
| 66 | H | -4.0505 | 4.0344  | 2.7388  |
| 67 | C | -4.0779 | 2.0484  | 3.5504  |
| 68 | H | -3.4766 | 1.4014  | 4.2041  |
| 69 | H | -4.3152 | 1.4957  | 2.6330  |
| 70 | H | -5.0221 | 2.2462  | 4.0829  |
| 71 | C | -2.9380 | 4.0242  | 4.5704  |
| 72 | H | -3.7829 | 4.0189  | 5.2770  |
| 73 | H | -2.6334 | 5.0682  | 4.4359  |
| 74 | H | -2.1062 | 3.4850  | 5.0466  |
| 75 | C | -1.2905 | 4.8182  | 1.7439  |

|     |    |         |         |         |
|-----|----|---------|---------|---------|
| 76  | H  | -0.6474 | 4.6263  | 0.8752  |
| 77  | C  | -2.3844 | 5.7813  | 1.3035  |
| 78  | H  | -3.0579 | 6.0439  | 2.1329  |
| 79  | H  | -2.9920 | 5.3492  | 0.4954  |
| 80  | H  | -1.9469 | 6.7206  | 0.9280  |
| 81  | C  | -0.4048 | 5.3969  | 2.8448  |
| 82  | H  | 0.2898  | 6.1443  | 2.4311  |
| 83  | H  | 0.1961  | 4.6151  | 3.3317  |
| 84  | H  | -0.9894 | 5.8971  | 3.6276  |
| 85  | C  | 2.7963  | 3.3341  | 2.7854  |
| 86  | H  | 2.2426  | 4.2689  | 2.6107  |
| 87  | C  | 4.2588  | 3.5810  | 2.4102  |
| 88  | H  | 4.6275  | 4.4516  | 2.9743  |
| 89  | H  | 4.4201  | 3.7893  | 1.3471  |
| 90  | H  | 4.8976  | 2.7312  | 2.6786  |
| 91  | C  | 2.6922  | 3.0223  | 4.2784  |
| 92  | H  | 3.1656  | 2.0619  | 4.5277  |
| 93  | H  | 1.6485  | 2.9735  | 4.6086  |
| 94  | H  | 3.2031  | 3.8051  | 4.8600  |
| 95  | C  | 2.9624  | 0.7582  | 1.1985  |
| 96  | H  | 2.2670  | -0.0089 | 0.8313  |
| 97  | C  | 3.8660  | 1.1451  | 0.0336  |
| 98  | H  | 4.6180  | 1.8910  | 0.3193  |
| 99  | H  | 3.2888  | 1.5464  | -0.8090 |
| 100 | H  | 4.4032  | 0.2531  | -0.3255 |
| 101 | C  | 3.7502  | 0.1446  | 2.3553  |
| 102 | H  | 4.1749  | -0.8214 | 2.0433  |
| 103 | H  | 3.1229  | -0.0397 | 3.2358  |
| 104 | H  | 4.5861  | 0.7816  | 2.6693  |
| 105 | C  | -0.2581 | 1.2466  | 5.9035  |
| 106 | N  | -0.2402 | 1.3286  | 4.7458  |
| 107 | C  | -0.3427 | 1.1161  | 7.3404  |
| 108 | H  | 0.4674  | 0.4762  | 7.7152  |
| 109 | H  | -1.3224 | 0.6519  | 7.5602  |
| 110 | H  | -0.2735 | 2.1014  | 7.8209  |
| 111 | Cl | -3.3929 | -0.3240 | 6.6589  |

/db/nbandeira/Fe(NPiso)/\_Ir(ppy)2(dtb-bpy)\_+/0e-/Ground\_state

Energy (POTENTIAL) = -19596.30441929004155 Eh

|    | Atom | X       | Y       | Z       |
|----|------|---------|---------|---------|
| 1  | Ir   | 0.0208  | 0.1044  | 0.0859  |
| 2  | C    | -1.5530 | 2.7564  | -0.1515 |
| 3  | H    | -0.5436 | 3.1746  | -0.1608 |
| 4  | C    | -2.6691 | 3.5690  | -0.2570 |
| 5  | C    | -3.9533 | 3.0060  | -0.2396 |
| 6  | C    | -4.0201 | 1.6172  | -0.1178 |
| 7  | H    | -4.9862 | 1.1163  | -0.1045 |
| 8  | C    | -2.8586 | 0.8520  | -0.0145 |
| 9  | C    | -2.8678 | -0.6176 | 0.1198  |
| 10 | C    | -4.0327 | -1.3722 | 0.2013  |
| 11 | H    | -4.9981 | -0.8668 | 0.1655  |
| 12 | C    | -3.9814 | -2.7654 | 0.3327  |
| 13 | C    | -2.7077 | -3.3387 | 0.3797  |
| 14 | C    | -1.5805 | -2.5316 | 0.2916  |
| 15 | H    | -0.5759 | -2.9605 | 0.3228  |
| 16 | C    | 1.4624  | 1.4818  | -0.0738 |
| 17 | C    | 2.1457  | 2.1486  | 0.9548  |
| 18 | H    | 1.9230  | 1.9129  | 1.9999  |
| 19 | C    | 3.1112  | 3.1161  | 0.6737  |
| 20 | H    | 3.6279  | 3.6215  | 1.4965  |
| 21 | C    | 3.4262  | 3.4455  | -0.6492 |
| 22 | H    | 4.1833  | 4.2048  | -0.8655 |
| 23 | C    | 2.7690  | 2.7988  | -1.6904 |
| 24 | H    | 3.0160  | 3.0570  | -2.7243 |
| 25 | C    | 1.7988  | 1.8267  | -1.4073 |
| 26 | C    | 1.0578  | 1.0984  | -2.4333 |
| 27 | C    | 1.2170  | 1.2456  | -3.8153 |
| 28 | H    | 1.9457  | 1.9601  | -4.2010 |
| 29 | C    | 0.4527  | 0.4828  | -4.6870 |
| 30 | H    | 0.5759  | 0.5934  | -5.7678 |
| 31 | C    | -0.4701 | -0.4243 | -4.1647 |
| 32 | H    | -1.0932 | -1.0479 | -4.8090 |
| 33 | C    | -0.5879 | -0.5275 | -2.7878 |
| 34 | H    | -1.2911 | -1.2254 | -2.3305 |
| 35 | C    | 1.4464  | -1.2851 | 0.2819  |
| 36 | C    | 2.1510  | -1.9566 | -0.7292 |
| 37 | H    | 1.9579  | -1.7182 | -1.7795 |

|    |   |         |         |         |
|----|---|---------|---------|---------|
| 38 | C | 3.1007  | -2.9324 | -0.4237 |
| 39 | H | 3.6346  | -3.4414 | -1.2332 |
| 40 | C | 3.3779  | -3.2657 | 0.9066  |
| 41 | H | 4.1226  | -4.0315 | 1.1419  |
| 42 | C | 2.6990  | -2.6144 | 1.9309  |
| 43 | H | 2.9166  | -2.8757 | 2.9706  |
| 44 | C | 1.7447  | -1.6339 | 1.6235  |
| 45 | C | 0.9827  | -0.9006 | 2.6304  |
| 46 | C | 1.1033  | -1.0515 | 4.0158  |
| 47 | H | 1.8151  | -1.7732 | 4.4195  |
| 48 | C | 0.3226  | -0.2836 | 4.8682  |
| 49 | H | 0.4157  | -0.3974 | 5.9518  |
| 50 | C | -0.5779 | 0.6324  | 4.3231  |
| 51 | H | -1.2128 | 1.2602  | 4.9516  |
| 52 | C | -0.6579 | 0.7387  | 2.9437  |
| 53 | H | -1.3431 | 1.4430  | 2.4694  |
| 54 | N | -1.6393 | 1.4272  | -0.0270 |
| 55 | N | -1.6510 | -1.2060 | 0.1600  |
| 56 | N | 0.1510  | 0.2089  | -1.9458 |
| 57 | N | 0.0971  | -0.0025 | 2.1204  |
| 58 | H | -2.5194 | 4.6467  | -0.3511 |
| 59 | H | -2.5650 | -4.4144 | 0.4841  |
| 60 | C | -5.1906 | 3.8887  | -0.3432 |
| 61 | C | -5.2702 | -3.5739 | 0.4139  |
| 62 | C | -4.9963 | -5.0704 | 0.5699  |
| 63 | H | -5.9553 | -5.6132 | 0.6235  |
| 64 | H | -4.4298 | -5.4743 | -0.2869 |
| 65 | H | -4.4344 | -5.2896 | 1.4944  |
| 66 | C | -6.0733 | -3.3486 | -0.8776 |
| 67 | H | -5.5021 | -3.6855 | -1.7604 |
| 68 | H | -7.0147 | -3.9244 | -0.8359 |
| 69 | H | -6.3333 | -2.2858 | -1.0201 |
| 70 | C | -5.1222 | 4.6901  | -1.6532 |
| 71 | H | -4.2298 | 5.3374  | -1.6942 |
| 72 | H | -5.1009 | 4.0156  | -2.5272 |
| 73 | H | -6.0129 | 5.3370  | -1.7388 |
| 74 | C | -6.4834 | 3.0716  | -0.3325 |
| 75 | H | -7.3468 | 3.7538  | -0.4110 |
| 76 | H | -6.5317 | 2.3711  | -1.1842 |
| 77 | H | -6.5967 | 2.4948  | 0.6016  |
| 78 | C | -5.2022 | 4.8523  | 0.8547  |

|    |   |         |         |        |
|----|---|---------|---------|--------|
| 79 | H | -6.0901 | 5.5063  | 0.7982 |
| 80 | H | -5.2440 | 4.2957  | 1.8075 |
| 81 | H | -4.3074 | 5.4978  | 0.8705 |
| 82 | C | -6.0860 | -3.0901 | 1.6236 |
| 83 | H | -6.3519 | -2.0225 | 1.5408 |
| 84 | H | -7.0247 | -3.6673 | 1.6921 |
| 85 | H | -5.5226 | -3.2342 | 2.5622 |

/db/nbandeira/Fe(NPiso)/NCMe\_substitution\_/0e-/1-NCMe+Cl-

Energy (POTENTIAL) = -4456.34027303 Eh

| Atom | X       | Y       | Z       |
|------|---------|---------|---------|
| 1 Fe | -0.2984 | 1.4266  | 2.6661  |
| 2 P  | -1.0737 | -0.7925 | 1.9417  |
| 3 P  | -1.9415 | 3.1656  | 2.1502  |
| 4 P  | 1.8928  | 2.1387  | 1.8075  |
| 5 N  | -0.4968 | 1.5303  | 0.0354  |
| 6 C  | 0.0823  | 0.2844  | -0.3848 |
| 7 C  | 0.8733  | 0.2247  | -1.5343 |
| 8 H  | 1.0608  | 1.1312  | -2.1067 |
| 9 C  | 1.4226  | -0.9819 | -1.9549 |
| 10 H | 2.0416  | -1.0013 | -2.8525 |
| 11 C | 1.1773  | -2.1675 | -1.2546 |
| 12 C | 0.3736  | -2.0949 | -0.1126 |
| 13 H | 0.1807  | -3.0167 | 0.4346  |
| 14 C | -0.1647 | -0.8899 | 0.3509  |
| 15 C | 1.7771  | -3.4734 | -1.6892 |
| 16 H | 1.9686  | -3.4852 | -2.7697 |
| 17 H | 1.1202  | -4.3172 | -1.4415 |
| 18 H | 2.7389  | -3.6474 | -1.1826 |
| 19 C | -1.9126 | 1.6393  | -0.1944 |
| 20 C | -2.5073 | 0.9721  | -1.2676 |
| 21 H | -1.8976 | 0.3462  | -1.9169 |
| 22 C | -3.8706 | 1.0969  | -1.5079 |
| 23 H | -4.3159 | 0.5567  | -2.3441 |
| 24 C | -4.6729 | 1.9137  | -0.7019 |
| 25 C | -4.0617 | 2.5846  | 0.3618  |
| 26 H | -4.6861 | 3.2100  | 0.9988  |
| 27 C | -2.6972 | 2.4507  | 0.6443  |
| 28 C | -6.1437 | 2.0544  | -0.9683 |
| 29 H | -6.3252 | 2.4530  | -1.9768 |
| 30 H | -6.6191 | 2.7281  | -0.2449 |
| 31 H | -6.6493 | 1.0798  | -0.9109 |
| 32 C | 0.2371  | 2.6993  | -0.3713 |
| 33 C | -0.2152 | 3.4769  | -1.4414 |
| 34 H | -1.1167 | 3.1840  | -1.9762 |
| 35 C | 0.4602  | 4.6330  | -1.8135 |
| 36 H | 0.0792  | 5.2288  | -2.6436 |
| 37 C | 1.6152  | 5.0403  | -1.1354 |
| 38 C | 2.0664  | 4.2428  | -0.0805 |

|    |   |         |         |         |
|----|---|---------|---------|---------|
| 39 | H | 2.9552  | 4.5670  | 0.4544  |
| 40 | C | 1.4003  | 3.0780  | 0.3196  |
| 41 | C | 2.3486  | 6.2885  | -1.5328 |
| 42 | H | 3.1212  | 6.5491  | -0.7989 |
| 43 | H | 1.6608  | 7.1400  | -1.6276 |
| 44 | H | 2.8402  | 6.1593  | -2.5086 |
| 45 | C | -0.4071 | -2.2322 | 2.9197  |
| 46 | H | -0.5531 | -3.1361 | 2.3107  |
| 47 | C | 1.0850  | -2.0099 | 3.1530  |
| 48 | H | 1.2482  | -1.1262 | 3.7863  |
| 49 | H | 1.6509  | -1.8797 | 2.2231  |
| 50 | H | 1.5071  | -2.8765 | 3.6819  |
| 51 | C | -1.1200 | -2.4344 | 4.2567  |
| 52 | H | -0.5158 | -3.1141 | 4.8752  |
| 53 | H | -2.1067 | -2.8916 | 4.1422  |
| 54 | H | -1.2561 | -1.5033 | 4.8228  |
| 55 | C | -2.8636 | -1.1142 | 1.4948  |
| 56 | H | -3.1798 | -0.1463 | 1.0841  |
| 57 | C | -3.0092 | -2.1747 | 0.4089  |
| 58 | H | -2.6182 | -3.1478 | 0.7405  |
| 59 | H | -2.4964 | -1.8955 | -0.5197 |
| 60 | H | -4.0765 | -2.3065 | 0.1763  |
| 61 | C | -3.7587 | -1.4325 | 2.6933  |
| 62 | H | -4.7995 | -1.2070 | 2.4199  |
| 63 | H | -3.5217 | -0.8662 | 3.6026  |
| 64 | H | -3.7139 | -2.5002 | 2.9424  |
| 65 | C | -3.3571 | 3.3804  | 3.3320  |
| 66 | H | -4.1053 | 4.0038  | 2.8211  |
| 67 | C | -3.9719 | 2.0260  | 3.6691  |
| 68 | H | -3.3091 | 1.4280  | 4.3098  |
| 69 | H | -4.2243 | 1.4389  | 2.7779  |
| 70 | H | -4.8998 | 2.1811  | 4.2390  |
| 71 | C | -2.9179 | 4.1068  | 4.6036  |
| 72 | H | -3.7275 | 4.0472  | 5.3453  |
| 73 | H | -2.7119 | 5.1685  | 4.4294  |
| 74 | H | -2.0247 | 3.6489  | 5.0515  |
| 75 | C | -1.3550 | 4.8630  | 1.6483  |
| 76 | H | -0.7170 | 4.6421  | 0.7837  |
| 77 | C | -2.4876 | 5.7682  | 1.1790  |
| 78 | H | -3.1669 | 6.0343  | 2.0009  |
| 79 | H | -3.0773 | 5.3044  | 0.3766  |

|     |    |         |         |         |
|-----|----|---------|---------|---------|
| 80  | H  | -2.0644 | 6.7033  | 0.7833  |
| 81  | C  | -0.4780 | 5.5215  | 2.7117  |
| 82  | H  | 0.1151  | 6.3215  | 2.2463  |
| 83  | H  | 0.2201  | 4.8132  | 3.1760  |
| 84  | H  | -1.0733 | 5.9753  | 3.5126  |
| 85  | C  | 2.8446  | 3.3644  | 2.8530  |
| 86  | H  | 2.2943  | 4.2991  | 2.6673  |
| 87  | C  | 4.3130  | 3.5995  | 2.4987  |
| 88  | H  | 4.6764  | 4.4562  | 3.0848  |
| 89  | H  | 4.4850  | 3.8295  | 1.4418  |
| 90  | H  | 4.9394  | 2.7387  | 2.7596  |
| 91  | C  | 2.6935  | 3.0281  | 4.3367  |
| 92  | H  | 3.1118  | 2.0422  | 4.5807  |
| 93  | H  | 1.6438  | 3.0432  | 4.6509  |
| 94  | H  | 3.2336  | 3.7767  | 4.9343  |
| 95  | C  | 3.0244  | 0.7667  | 1.2269  |
| 96  | H  | 2.3109  | 0.0207  | 0.8502  |
| 97  | C  | 3.9448  | 1.1471  | 0.0734  |
| 98  | H  | 4.7072  | 1.8766  | 0.3724  |
| 99  | H  | 3.3857  | 1.5611  | -0.7753 |
| 100 | H  | 4.4655  | 0.2444  | -0.2793 |
| 101 | C  | 3.7752  | 0.1352  | 2.3985  |
| 102 | H  | 4.1925  | -0.8303 | 2.0789  |
| 103 | H  | 3.1252  | -0.0541 | 3.2616  |
| 104 | H  | 4.6113  | 0.7589  | 2.7361  |
| 105 | C  | -0.2570 | 1.1948  | 5.8444  |
| 106 | N  | -0.2555 | 1.3198  | 4.6953  |
| 107 | C  | -0.2874 | 1.0189  | 7.2709  |
| 108 | H  | -0.1761 | 1.9891  | 7.7725  |
| 109 | H  | 0.5235  | 0.3461  | 7.5798  |
| 110 | H  | -1.2739 | 0.5668  | 7.4978  |
| 111 | Cl | -3.3017 | -0.3107 | 6.5957  |

/db/nbandeira/Fe(NPiso)/NCMe\_substitution\_/1e-/1-NCMe+Cl-

Energy (POTENTIAL) = -4456.33882696966066 Eh

|    | Atom | X       | Y       | Z       |
|----|------|---------|---------|---------|
| 1  | Fe   | -0.3091 | 1.4462  | 2.7758  |
| 2  | P    | -1.0323 | -0.6841 | 1.9364  |
| 3  | P    | -1.8704 | 3.0830  | 2.1366  |
| 4  | P    | 1.7833  | 2.1159  | 1.8220  |
| 5  | N    | -0.5123 | 1.5344  | -0.1086 |
| 6  | C    | 0.0706  | 0.2864  | -0.4675 |
| 7  | C    | 0.8639  | 0.1906  | -1.6159 |
| 8  | H    | 1.0268  | 1.0787  | -2.2246 |
| 9  | C    | 1.4404  | -1.0191 | -1.9864 |
| 10 | H    | 2.0601  | -1.0660 | -2.8830 |
| 11 | C    | 1.2166  | -2.1765 | -1.2327 |
| 12 | C    | 0.4096  | -2.0686 | -0.0955 |
| 13 | H    | 0.2370  | -2.9715 | 0.4888  |
| 14 | C    | -0.1514 | -0.8564 | 0.3242  |
| 15 | C    | 1.8458  | -3.4871 | -1.6125 |
| 16 | H    | 1.8551  | -3.6265 | -2.7021 |
| 17 | H    | 1.3129  | -4.3334 | -1.1601 |
| 18 | H    | 2.8912  | -3.5348 | -1.2707 |
| 19 | C    | -1.9228 | 1.6510  | -0.2796 |
| 20 | C    | -2.5555 | 1.0005  | -1.3419 |
| 21 | H    | -1.9619 | 0.3934  | -2.0242 |
| 22 | C    | -3.9289 | 1.1206  | -1.5327 |
| 23 | H    | -4.4033 | 0.5963  | -2.3634 |
| 24 | C    | -4.7009 | 1.9203  | -0.6840 |
| 25 | C    | -4.0502 | 2.5779  | 0.3675  |
| 26 | H    | -4.6554 | 3.1931  | 1.0329  |
| 27 | C    | -2.6788 | 2.4427  | 0.6090  |
| 28 | C    | -6.1877 | 2.0432  | -0.8621 |
| 29 | H    | -6.4821 | 1.8739  | -1.9061 |
| 30 | H    | -6.5479 | 3.0343  | -0.5561 |
| 31 | H    | -6.7180 | 1.2996  | -0.2473 |
| 32 | C    | 0.2335  | 2.6999  | -0.4505 |
| 33 | C    | -0.1891 | 3.5063  | -1.5133 |
| 34 | H    | -1.0726 | 3.2174  | -2.0806 |
| 35 | C    | 0.4863  | 4.6778  | -1.8346 |
| 36 | H    | 0.1276  | 5.2961  | -2.6585 |
| 37 | C    | 1.6184  | 5.0667  | -1.1099 |
| 38 | C    | 2.0375  | 4.2425  | -0.0607 |

|    |   |         |         |         |
|----|---|---------|---------|---------|
| 39 | H | 2.9057  | 4.5635  | 0.5083  |
| 40 | C | 1.3681  | 3.0654  | 0.2979  |
| 41 | C | 2.3703  | 6.3207  | -1.4553 |
| 42 | H | 3.0200  | 6.6382  | -0.6298 |
| 43 | H | 1.6850  | 7.1455  | -1.6930 |
| 44 | H | 3.0084  | 6.1654  | -2.3388 |
| 45 | C | -0.4040 | -2.1647 | 2.8973  |
| 46 | H | -0.5739 | -3.0696 | 2.2954  |
| 47 | C | 1.0925  | -1.9850 | 3.1362  |
| 48 | H | 1.2701  | -1.1099 | 3.7765  |
| 49 | H | 1.6619  | -1.8482 | 2.2094  |
| 50 | H | 1.4985  | -2.8671 | 3.6538  |
| 51 | C | -1.1120 | -2.3453 | 4.2410  |
| 52 | H | -0.5170 | -3.0249 | 4.8697  |
| 53 | H | -2.1075 | -2.7867 | 4.1402  |
| 54 | H | -1.2300 | -1.4037 | 4.7930  |
| 55 | C | -2.8128 | -1.0799 | 1.4571  |
| 56 | H | -3.1487 | -0.1272 | 1.0266  |
| 57 | C | -2.9327 | -2.1568 | 0.3843  |
| 58 | H | -2.5115 | -3.1149 | 0.7241  |
| 59 | H | -2.4278 | -1.8745 | -0.5476 |
| 60 | H | -3.9954 | -2.3270 | 0.1517  |
| 61 | C | -3.7317 | -1.4047 | 2.6361  |
| 62 | H | -4.7723 | -1.2013 | 2.3425  |
| 63 | H | -3.5251 | -0.8268 | 3.5444  |
| 64 | H | -3.6742 | -2.4692 | 2.8978  |
| 65 | C | -3.3042 | 3.3307  | 3.3061  |
| 66 | H | -4.0522 | 3.9699  | 2.8150  |
| 67 | C | -3.9338 | 1.9838  | 3.6410  |
| 68 | H | -3.2428 | 1.3583  | 4.2218  |
| 69 | H | -4.2383 | 1.4254  | 2.7474  |
| 70 | H | -4.8276 | 2.1320  | 4.2662  |
| 71 | C | -2.8435 | 4.0289  | 4.5860  |
| 72 | H | -3.6391 | 3.9669  | 5.3434  |
| 73 | H | -2.6237 | 5.0910  | 4.4290  |
| 74 | H | -1.9473 | 3.5502  | 5.0068  |
| 75 | C | -1.3480 | 4.8138  | 1.6339  |
| 76 | H | -0.7246 | 4.6150  | 0.7530  |
| 77 | C | -2.4992 | 5.7124  | 1.2004  |
| 78 | H | -3.1591 | 5.9674  | 2.0420  |
| 79 | H | -3.1093 | 5.2444  | 0.4157  |

|     |    |         |         |         |
|-----|----|---------|---------|---------|
| 80  | H  | -2.1038 | 6.6567  | 0.7956  |
| 81  | C  | -0.4549 | 5.4809  | 2.6781  |
| 82  | H  | 0.1270  | 6.2883  | 2.2095  |
| 83  | H  | 0.2536  | 4.7716  | 3.1252  |
| 84  | H  | -1.0369 | 5.9270  | 3.4938  |
| 85  | C  | 2.7809  | 3.3601  | 2.8268  |
| 86  | H  | 2.2406  | 4.2983  | 2.6314  |
| 87  | C  | 4.2530  | 3.5920  | 2.4824  |
| 88  | H  | 4.6150  | 4.4616  | 3.0517  |
| 89  | H  | 4.4368  | 3.7969  | 1.4222  |
| 90  | H  | 4.8790  | 2.7381  | 2.7666  |
| 91  | C  | 2.6319  | 3.0569  | 4.3178  |
| 92  | H  | 3.0711  | 2.0850  | 4.5829  |
| 93  | H  | 1.5797  | 3.0437  | 4.6247  |
| 94  | H  | 3.1505  | 3.8287  | 4.9065  |
| 95  | C  | 2.9636  | 0.7754  | 1.2342  |
| 96  | H  | 2.2649  | 0.0144  | 0.8596  |
| 97  | C  | 3.8861  | 1.1534  | 0.0812  |
| 98  | H  | 4.6362  | 1.8979  | 0.3751  |
| 99  | H  | 3.3254  | 1.5525  | -0.7737 |
| 100 | H  | 4.4244  | 0.2571  | -0.2640 |
| 101 | C  | 3.7267  | 0.1576  | 2.4052  |
| 102 | H  | 4.1417  | -0.8151 | 2.1024  |
| 103 | H  | 3.0854  | -0.0143 | 3.2783  |
| 104 | H  | 4.5669  | 0.7850  | 2.7264  |
| 105 | C  | -0.2390 | 1.1585  | 5.9132  |
| 106 | N  | -0.2294 | 1.2742  | 4.7600  |
| 107 | C  | -0.3121 | 0.9931  | 7.3456  |
| 108 | H  | 0.4835  | 0.3215  | 7.6941  |
| 109 | H  | -1.3045 | 0.5503  | 7.5587  |
| 110 | H  | -0.2124 | 1.9646  | 7.8478  |
| 111 | Cl | -3.3896 | -0.3621 | 6.7240  |

/db/nbandeira/Fe(NPiso)/NCMe\_substitution\_/2e-/1-Cl+NCMe

Energy (POTENTIAL) = -4456.33553582472450 Eh

|    | Atom | X       | Y       | Z       |
|----|------|---------|---------|---------|
| 1  | Fe   | -0.0297 | -0.1152 | 0.0353  |
| 2  | P    | -0.7673 | -2.2263 | -0.7603 |
| 3  | P    | -1.6281 | 1.4896  | -0.5325 |
| 4  | P    | 2.0227  | 0.5765  | -1.0248 |
| 5  | Cl   | 0.1428  | -0.3075 | 2.4323  |
| 6  | N    | -0.3465 | -0.0256 | -2.8216 |
| 7  | C    | 0.2502  | -1.2615 | -3.1891 |
| 8  | C    | 1.0525  | -1.3371 | -4.3336 |
| 9  | H    | 1.2162  | -0.4308 | -4.9151 |
| 10 | C    | 1.6115  | -2.5476 | -4.7334 |
| 11 | H    | 2.2400  | -2.5828 | -5.6252 |
| 12 | C    | 1.3605  | -3.7228 | -4.0126 |
| 13 | C    | 0.5627  | -3.6306 | -2.8686 |
| 14 | H    | 0.3698  | -4.5445 | -2.3069 |
| 15 | C    | 0.0298  | -2.4139 | -2.4140 |
| 16 | C    | 1.9566  | -5.0358 | -4.4398 |
| 17 | H    | 1.8841  | -5.1754 | -5.5277 |
| 18 | H    | 1.4536  | -5.8811 | -3.9521 |
| 19 | H    | 3.0249  | -5.0923 | -4.1791 |
| 20 | C    | -1.7573 | 0.0604  | -2.9375 |
| 21 | C    | -2.4137 | -0.6150 | -3.9709 |
| 22 | H    | -1.8294 | -1.2082 | -4.6727 |
| 23 | C    | -3.8059 | -0.5387 | -4.0993 |
| 24 | H    | -4.3039 | -1.0884 | -4.9000 |
| 25 | C    | -4.5592 | 0.2415  | -3.2249 |
| 26 | C    | -3.8813 | 0.9356  | -2.2040 |
| 27 | H    | -4.4757 | 1.5378  | -1.5171 |
| 28 | C    | -2.4966 | 0.8436  | -2.0252 |
| 29 | C    | -6.0552 | 0.3394  | -3.3401 |
| 30 | H    | -6.3814 | 1.3831  | -3.4626 |
| 31 | H    | -6.5522 | -0.0453 | -2.4366 |
| 32 | H    | -6.4288 | -0.2339 | -4.1985 |
| 33 | C    | 0.3587  | 1.1523  | -3.2053 |
| 34 | C    | -0.1564 | 1.9811  | -4.1899 |
| 35 | H    | -1.1000 | 1.7070  | -4.6627 |
| 36 | C    | 0.5112  | 3.1689  | -4.5755 |
| 37 | H    | 0.0839  | 3.8245  | -5.3351 |
| 38 | C    | 1.7668  | 3.4673  | -3.9812 |

|    |   |         |         |         |
|----|---|---------|---------|---------|
| 39 | C | 2.2898  | 2.6140  | -3.0246 |
| 40 | H | 3.2527  | 2.8778  | -2.5926 |
| 41 | C | 1.6041  | 1.4335  | -2.5602 |
| 42 | C | 2.5171  | 4.7024  | -4.4018 |
| 43 | H | 3.4503  | 4.8229  | -3.8345 |
| 44 | H | 1.9112  | 5.6106  | -4.2513 |
| 45 | H | 2.7744  | 4.6762  | -5.4734 |
| 46 | C | -0.1396 | -3.7396 | 0.1621  |
| 47 | H | -0.4529 | -4.6384 | -0.3915 |
| 48 | C | 1.3832  | -3.7019 | 0.2631  |
| 49 | H | 1.6916  | -2.8621 | 0.8992  |
| 50 | H | 1.8849  | -3.5890 | -0.7053 |
| 51 | H | 1.7503  | -4.6287 | 0.7305  |
| 52 | C | -0.7058 | -3.8120 | 1.5830  |
| 53 | H | -0.1910 | -4.6132 | 2.1361  |
| 54 | H | -1.7761 | -4.0314 | 1.6151  |
| 55 | H | -0.5313 | -2.8667 | 2.1165  |
| 56 | C | -2.5666 | -2.6533 | -1.1717 |
| 57 | H | -2.9220 | -1.7124 | -1.6119 |
| 58 | C | -2.7242 | -3.7522 | -2.2164 |
| 59 | H | -2.2995 | -4.7067 | -1.8697 |
| 60 | H | -2.2419 | -3.4907 | -3.1660 |
| 61 | H | -3.7939 | -3.9226 | -2.4182 |
| 62 | C | -3.4445 | -2.9552 | 0.0416  |
| 63 | H | -4.5006 | -2.7983 | -0.2265 |
| 64 | H | -3.2259 | -2.3210 | 0.9077  |
| 65 | H | -3.3459 | -4.0032 | 0.3553  |
| 66 | C | -3.0292 | 1.7585  | 0.6806  |
| 67 | H | -3.8149 | 2.3571  | 0.1960  |
| 68 | C | -3.6037 | 0.4078  | 1.0914  |
| 69 | H | -2.8265 | -0.2031 | 1.5701  |
| 70 | H | -3.9942 | -0.1545 | 0.2341  |
| 71 | H | -4.4256 | 0.5418  | 1.8124  |
| 72 | C | -2.5412 | 2.5202  | 1.9130  |
| 73 | H | -3.3128 | 2.4866  | 2.6977  |
| 74 | H | -2.3394 | 3.5758  | 1.6986  |
| 75 | H | -1.6272 | 2.0679  | 2.3240  |
| 76 | C | -1.1292 | 3.2175  | -1.0683 |
| 77 | H | -0.5314 | 2.9879  | -1.9604 |
| 78 | C | -2.2857 | 4.1127  | -1.4936 |
| 79 | H | -2.9193 | 4.4006  | -0.6414 |

|     |   |         |         |         |
|-----|---|---------|---------|---------|
| 80  | H | -2.9237 | 3.6208  | -2.2412 |
| 81  | H | -1.9004 | 5.0410  | -1.9450 |
| 82  | C | -0.2002 | 3.9020  | -0.0677 |
| 83  | H | 0.3857  | 4.6837  | -0.5753 |
| 84  | H | 0.5091  | 3.1904  | 0.3762  |
| 85  | H | -0.7484 | 4.3851  | 0.7512  |
| 86  | C | 3.0568  | 1.8597  | -0.0939 |
| 87  | H | 2.5263  | 2.7903  | -0.3486 |
| 88  | C | 4.5244  | 2.0500  | -0.4818 |
| 89  | H | 4.9152  | 2.9542  | 0.0124  |
| 90  | H | 4.6864  | 2.1685  | -1.5585 |
| 91  | H | 5.1448  | 1.2091  | -0.1473 |
| 92  | C | 2.9543  | 1.6659  | 1.4178  |
| 93  | H | 3.4971  | 0.7662  | 1.7426  |
| 94  | H | 1.9162  | 1.5472  | 1.7519  |
| 95  | H | 3.4007  | 2.5273  | 1.9411  |
| 96  | C | 3.2175  | -0.8233 | -1.4747 |
| 97  | H | 2.5054  | -1.5893 | -1.8153 |
| 98  | C | 4.1673  | -0.5544 | -2.6344 |
| 99  | H | 4.9832  | 0.1256  | -2.3576 |
| 100 | H | 3.6274  | -0.1141 | -3.4837 |
| 101 | H | 4.6246  | -1.4968 | -2.9775 |
| 102 | C | 3.9339  | -1.3797 | -0.2474 |
| 103 | H | 4.3292  | -2.3864 | -0.4545 |
| 104 | H | 3.2619  | -1.4614 | 0.6174  |
| 105 | H | 4.7831  | -0.7520 | 0.0528  |
| 106 | C | -3.1757 | -1.4339 | 4.2608  |
| 107 | N | -3.6651 | -2.3865 | 3.8181  |
| 108 | C | -2.5477 | -0.2404 | 4.7931  |
| 109 | H | -1.6016 | -0.0703 | 4.2552  |
| 110 | H | -2.3480 | -0.3613 | 5.8656  |
| 111 | H | -3.2035 | 0.6273  | 4.6450  |

/db/nbandeira/Fe(NPiso)/1\_with\_vacancy+\_1e-

Energy (POTENTIAL) = -3872.82755323 Eh

|    | Atom | X       | Y       | Z       |
|----|------|---------|---------|---------|
| 1  | Fe   | -0.0515 | -0.0185 | 0.1333  |
| 2  | P    | 2.2444  | -0.0801 | 0.6709  |
| 3  | P    | -1.1496 | -1.9970 | 0.6737  |
| 4  | P    | -1.2452 | 1.8963  | 0.7775  |
| 5  | N    | -0.0012 | -0.0773 | 2.6961  |
| 6  | C    | 2.1967  | 0.9126  | 2.2163  |
| 7  | C    | 1.0413  | 0.8543  | 3.0187  |
| 8  | C    | 0.9267  | 1.6975  | 4.1246  |
| 9  | H    | 0.0334  | 1.6534  | 4.7456  |
| 10 | C    | 1.9407  | 2.6014  | 4.4347  |
| 11 | H    | 1.8236  | 3.2596  | 5.2964  |
| 12 | C    | 3.1080  | 2.6637  | 3.6686  |
| 13 | C    | 3.2171  | 1.7971  | 2.5736  |
| 14 | H    | 4.1254  | 1.8377  | 1.9720  |
| 15 | C    | 4.2048  | 3.6414  | 3.9811  |
| 16 | H    | 4.2108  | 4.4695  | 3.2561  |
| 17 | H    | 5.1927  | 3.1631  | 3.9330  |
| 18 | H    | 4.0803  | 4.0756  | 4.9811  |
| 19 | C    | 3.1959  | -1.6166 | 1.2056  |
| 20 | H    | 2.4087  | -2.2342 | 1.6606  |
| 21 | C    | 3.8033  | -2.4056 | 0.0485  |
| 22 | H    | 3.1082  | -2.5555 | -0.7851 |
| 23 | H    | 4.1027  | -3.3988 | 0.4147  |
| 24 | H    | 4.7074  | -1.9153 | -0.3374 |
| 25 | C    | 4.2586  | -1.3312 | 2.2616  |
| 26 | H    | 5.0207  | -0.6305 | 1.8895  |
| 27 | H    | 4.7703  | -2.2694 | 2.5248  |
| 28 | H    | 3.8312  | -0.9140 | 3.1810  |
| 29 | C    | 3.3626  | 0.8827  | -0.4738 |
| 30 | H    | 4.3818  | 0.8889  | -0.0575 |
| 31 | C    | 2.8437  | 2.3108  | -0.6214 |
| 32 | H    | 1.8503  | 2.2979  | -1.0908 |
| 33 | H    | 3.5143  | 2.8826  | -1.2799 |
| 34 | H    | 2.7593  | 2.8522  | 0.3276  |
| 35 | C    | 3.3810  | 0.2392  | -1.8638 |
| 36 | H    | 3.8544  | -0.7458 | -1.8874 |
| 37 | H    | 3.9358  | 0.8897  | -2.5559 |
| 38 | H    | 2.3578  | 0.1341  | -2.2569 |

|    |   |         |         |         |
|----|---|---------|---------|---------|
| 39 | C | -0.2393 | -2.4755 | 2.1972  |
| 40 | C | 0.3030  | -1.4501 | 2.9940  |
| 41 | C | 1.1199  | -1.7746 | 4.0793  |
| 42 | H | 1.5351  | -0.9780 | 4.6946  |
| 43 | C | 1.4090  | -3.1032 | 4.3754  |
| 44 | H | 2.0563  | -3.3332 | 5.2227  |
| 45 | C | 0.8704  | -4.1438 | 3.6104  |
| 46 | C | 0.0430  | -3.8035 | 2.5337  |
| 47 | H | -0.3680 | -4.6112 | 1.9284  |
| 48 | C | 1.1908  | -5.5787 | 3.9189  |
| 49 | H | 2.2268  | -5.8195 | 3.6366  |
| 50 | H | 0.5290  | -6.2628 | 3.3731  |
| 51 | H | 1.0923  | -5.7874 | 4.9931  |
| 52 | C | -0.9246 | -3.4515 | -0.4669 |
| 53 | H | -1.2696 | -4.3611 | 0.0462  |
| 54 | C | -1.7569 | -3.2618 | -1.7344 |
| 55 | H | -2.8340 | -3.3387 | -1.5462 |
| 56 | H | -1.4944 | -4.0399 | -2.4662 |
| 57 | H | -1.5596 | -2.2849 | -2.2023 |
| 58 | C | 0.5520  | -3.5978 | -0.8161 |
| 59 | H | 0.9168  | -2.7027 | -1.3415 |
| 60 | H | 0.6985  | -4.4615 | -1.4818 |
| 61 | H | 1.1782  | -3.7475 | 0.0721  |
| 62 | C | -2.9375 | -2.0469 | 1.2326  |
| 63 | H | -2.9056 | -1.4283 | 2.1402  |
| 64 | C | -3.8802 | -1.3602 | 0.2484  |
| 65 | H | -3.4666 | -0.4092 | -0.1077 |
| 66 | H | -4.8390 | -1.1443 | 0.7423  |
| 67 | H | -4.0943 | -1.9839 | -0.6287 |
| 68 | C | -3.4244 | -3.4370 | 1.6242  |
| 69 | H | -3.4973 | -4.1033 | 0.7530  |
| 70 | H | -4.4289 | -3.3660 | 2.0682  |
| 71 | H | -2.7669 | -3.9113 | 2.3655  |
| 72 | C | -2.0231 | 1.2790  | 2.3214  |
| 73 | C | -1.3241 | 0.3270  | 3.0850  |
| 74 | C | -1.9363 | -0.2473 | 4.2023  |
| 75 | H | -1.3955 | -0.9869 | 4.7904  |
| 76 | C | -3.2391 | 0.0929  | 4.5522  |
| 77 | H | -3.7008 | -0.3821 | 5.4189  |
| 78 | C | -3.9614 | 1.0293  | 3.8041  |
| 79 | C | -3.3271 | 1.6134  | 2.7027  |

|     |   |         |        |         |
|-----|---|---------|--------|---------|
| 80  | H | -3.8916 | 2.3334 | 2.1139  |
| 81  | C | 0.0308  | 4.3333 | 0.0982  |
| 82  | H | 0.3887  | 3.7552 | -0.7617 |
| 83  | H | 0.8335  | 5.0272 | 0.3873  |
| 84  | H | -0.8196 | 4.9392 | -0.2358 |
| 85  | C | -2.6882 | 2.3577 | -0.3248 |
| 86  | H | -3.4227 | 1.5759 | -0.0810 |
| 87  | C | -3.3738 | 3.7098 | -0.1359 |
| 88  | H | -3.6831 | 3.9035 | 0.8975  |
| 89  | H | -4.2798 | 3.7379 | -0.7596 |
| 90  | H | -2.7362 | 4.5423 | -0.4548 |
| 91  | C | -2.2694 | 2.1556 | -1.7826 |
| 92  | H | -1.4845 | 2.8642 | -2.0820 |
| 93  | H | -3.1321 | 2.3132 | -2.4469 |
| 94  | H | -1.8909 | 1.1375 | -1.9578 |
| 95  | C | -0.3294 | 3.4523 | 1.2939  |
| 96  | H | 0.6073  | 3.0349 | 1.6896  |
| 97  | C | -0.9920 | 4.2492 | 2.4118  |
| 98  | H | -1.9489 | 4.6854 | 2.0975  |
| 99  | H | -0.3313 | 5.0771 | 2.7116  |
| 100 | H | -1.1743 | 3.6308 | 3.2998  |
| 101 | C | -5.3666 | 1.4048 | 4.1794  |
| 102 | H | -5.3789 | 2.0187 | 5.0927  |
| 103 | H | -5.9771 | 0.5140 | 4.3814  |
| 104 | H | -5.8531 | 1.9817 | 3.3829  |

/db/nbandeira/Fe(NPiso)/L=Cl/2e-/1-Cl

Energy (POTENTIAL) = -4334.38680599 Eh

| Atom | X       | Y       | Z       |
|------|---------|---------|---------|
| 1 Fe | 0.0111  | -0.0046 | -0.0045 |
| 2 P  | -0.6976 | -2.1779 | -0.6659 |
| 3 P  | -1.6131 | 1.5882  | -0.6589 |
| 4 P  | 2.0199  | 0.5563  | -1.1172 |
| 5 Cl | 0.1200  | -0.0473 | 2.3881  |
| 6 N  | -0.3846 | -0.1083 | -2.8599 |
| 7 C  | 0.1865  | -1.3589 | -3.1971 |
| 8 C  | 0.8827  | -1.5067 | -4.4004 |
| 9 H  | 0.9861  | -0.6478 | -5.0617 |
| 10 C | 1.4371  | -2.7420 | -4.7554 |
| 11 H | 1.9866  | -2.8368 | -5.6936 |
| 12 C | 1.2758  | -3.8562 | -3.9333 |
| 13 C | 0.5586  | -3.6960 | -2.7346 |
| 14 H | 0.4362  | -4.5683 | -2.0927 |
| 15 C | 0.0321  | -2.4616 | -2.3334 |
| 16 C | 1.8660  | -5.1924 | -4.2912 |
| 17 H | 2.2139  | -5.2106 | -5.3324 |
| 18 H | 1.1339  | -6.0026 | -4.1617 |
| 19 H | 2.7273  | -5.4338 | -3.6491 |
| 20 C | -1.8074 | -0.0249 | -2.9408 |
| 21 C | -2.5088 | -0.8023 | -3.8473 |
| 22 H | -1.9564 | -1.5005 | -4.4783 |
| 23 C | -3.9152 | -0.7027 | -3.9669 |
| 24 H | -4.4580 | -1.3422 | -4.6644 |
| 25 C | -4.6014 | 0.2896  | -3.2098 |
| 26 C | -3.8885 | 1.0873  | -2.3320 |
| 27 H | -4.4392 | 1.8416  | -1.7664 |
| 28 C | -2.4737 | 0.9408  | -2.1120 |
| 29 C | -6.0873 | 0.4578  | -3.3769 |
| 30 H | -6.3559 | 0.6995  | -4.4186 |
| 31 H | -6.4799 | 1.2585  | -2.7348 |
| 32 H | -6.6274 | -0.4699 | -3.1256 |
| 33 C | 0.3170  | 1.0511  | -3.2903 |
| 34 C | -0.2222 | 1.8381  | -4.3153 |
| 35 H | -1.1507 | 1.5133  | -4.7833 |
| 36 C | 0.3986  | 3.0174  | -4.7156 |
| 37 H | -0.0499 | 3.6240  | -5.5043 |
| 38 C | 1.5860  | 3.4351  | -4.1042 |

|    |   |         |         |         |
|----|---|---------|---------|---------|
| 39 | C | 2.1181  | 2.6332  | -3.0885 |
| 40 | H | 3.0278  | 2.9799  | -2.6065 |
| 41 | C | 1.5050  | 1.4487  | -2.6508 |
| 42 | C | 2.2755  | 4.7026  | -4.5281 |
| 43 | H | 2.9861  | 5.0464  | -3.7650 |
| 44 | H | 1.5536  | 5.5102  | -4.7121 |
| 45 | H | 2.8401  | 4.5560  | -5.4621 |
| 46 | C | -0.0136 | -3.6203 | 0.3253  |
| 47 | H | -0.3060 | -4.5563 | -0.1754 |
| 48 | C | 1.5082  | -3.5295 | 0.3916  |
| 49 | H | 1.8035  | -2.6415 | 0.9671  |
| 50 | H | 1.9826  | -3.4641 | -0.5949 |
| 51 | H | 1.9159  | -4.4132 | 0.9067  |
| 52 | C | -0.5567 | -3.6402 | 1.7567  |
| 53 | H | 0.0079  | -4.3786 | 2.3474  |
| 54 | H | -1.6123 | -3.9198 | 1.8124  |
| 55 | H | -0.4322 | -2.6577 | 2.2346  |
| 56 | C | -2.5082 | -2.6254 | -0.9715 |
| 57 | H | -2.8623 | -1.7162 | -1.4761 |
| 58 | C | -2.7140 | -3.7977 | -1.9224 |
| 59 | H | -2.3070 | -4.7342 | -1.5109 |
| 60 | H | -2.2436 | -3.6176 | -2.8964 |
| 61 | H | -3.7915 | -3.9524 | -2.0942 |
| 62 | C | -3.3409 | -2.8165 | 0.2951  |
| 63 | H | -4.4027 | -2.6423 | 0.0632  |
| 64 | H | -3.0620 | -2.1291 | 1.1022  |
| 65 | H | -3.2597 | -3.8426 | 0.6784  |
| 66 | C | -2.9993 | 1.9225  | 0.5620  |
| 67 | H | -3.7532 | 2.5405  | 0.0512  |
| 68 | C | -3.6432 | 0.6050  | 0.9741  |
| 69 | H | -2.9139 | -0.0185 | 1.5092  |
| 70 | H | -4.0087 | 0.0404  | 0.1067  |
| 71 | H | -4.4955 | 0.7857  | 1.6488  |
| 72 | C | -2.5190 | 2.6797  | 1.7986  |
| 73 | H | -3.3301 | 2.7290  | 2.5427  |
| 74 | H | -2.2239 | 3.7104  | 1.5717  |
| 75 | H | -1.6651 | 2.1675  | 2.2654  |
| 76 | C | -1.0526 | 3.3233  | -1.1551 |
| 77 | H | -0.4646 | 3.0913  | -2.0525 |
| 78 | C | -2.1845 | 4.2516  | -1.5753 |
| 79 | H | -2.8006 | 4.5619  | -0.7180 |

|     |   |         |         |         |
|-----|---|---------|---------|---------|
| 80  | H | -2.8429 | 3.7643  | -2.3086 |
| 81  | H | -1.7855 | 5.1682  | -2.0400 |
| 82  | C | -0.1001 | 3.9733  | -0.1535 |
| 83  | H | 0.5385  | 4.7160  | -0.6567 |
| 84  | H | 0.5595  | 3.2291  | 0.3158  |
| 85  | H | -0.6319 | 4.4979  | 0.6509  |
| 86  | C | 3.1218  | 1.8308  | -0.2635 |
| 87  | H | 2.5461  | 2.7567  | -0.4150 |
| 88  | C | 4.5432  | 2.0715  | -0.7759 |
| 89  | H | 4.9524  | 2.9713  | -0.2903 |
| 90  | H | 4.6119  | 2.2240  | -1.8584 |
| 91  | H | 5.2105  | 1.2393  | -0.5208 |
| 92  | C | 3.1591  | 1.5643  | 1.2418  |
| 93  | H | 3.7342  | 0.6562  | 1.4744  |
| 94  | H | 2.1545  | 1.4274  | 1.6627  |
| 95  | H | 3.6495  | 2.4048  | 1.7579  |
| 96  | C | 3.1674  | -0.8031 | -1.7488 |
| 97  | H | 2.4437  | -1.5835 | -2.0219 |
| 98  | C | 3.9834  | -0.4825 | -2.9956 |
| 99  | H | 4.7668  | 0.2613  | -2.8020 |
| 100 | H | 3.3485  | -0.1075 | -3.8083 |
| 101 | H | 4.4799  | -1.3974 | -3.3565 |
| 102 | C | 4.0399  | -1.3640 | -0.6269 |
| 103 | H | 4.4387  | -2.3474 | -0.9192 |
| 104 | H | 3.4789  | -1.5001 | 0.3058  |
| 105 | H | 4.8977  | -0.7156 | -0.4098 |

/db/nbandeira/Fe(NPiso)/BIH/1e-/BI

Energy (POTENTIAL) = -688.91773017287005 Eh

| Atom | X       | Y       | Z       |
|------|---------|---------|---------|
| 1 C  | 1.4482  | -2.6896 | -2.1851 |
| 2 C  | 2.8064  | -2.9580 | -2.4288 |
| 3 C  | 1.1335  | -1.9572 | -1.0439 |
| 4 H  | 3.0829  | -3.5290 | -3.3152 |
| 5 C  | 3.8018  | -2.5030 | -1.5623 |
| 6 C  | 2.1380  | -1.5061 | -0.1639 |
| 7 H  | 4.8472  | -2.7234 | -1.7787 |
| 8 C  | 3.4833  | -1.7675 | -0.4074 |
| 9 H  | 4.2605  | -1.4274 | 0.2752  |
| 10 H | 0.6755  | -3.0315 | -2.8718 |
| 11 N | -0.0768 | -1.5473 | -0.5280 |
| 12 N | 1.5134  | -0.8142 | 0.8506  |
| 13 C | 2.2244  | 0.0513  | 1.7594  |
| 14 H | 2.5017  | -0.4625 | 2.6905  |
| 15 H | 3.1399  | 0.4064  | 1.2704  |
| 16 H | 1.6045  | 0.9198  | 2.0047  |
| 17 C | -1.3409 | -2.0759 | -0.9790 |
| 18 H | -2.0252 | -2.1716 | -0.1296 |
| 19 H | -1.8083 | -1.4393 | -1.7432 |
| 20 H | -1.1781 | -3.0726 | -1.4070 |
| 21 C | 0.1375  | -0.8324 | 0.6460  |
| 22 C | -0.8504 | -0.2408 | 1.4715  |
| 23 C | -2.0865 | 0.2480  | 0.9371  |
| 24 C | -0.6650 | -0.0987 | 2.8849  |
| 25 C | -3.0458 | 0.8250  | 1.7541  |
| 26 C | -1.6353 | 0.4859  | 3.6831  |
| 27 C | -2.8415 | 0.9578  | 3.1381  |
| 28 H | -2.2625 | 0.2115  | -0.1365 |
| 29 H | 0.2328  | -0.4978 | 3.3540  |
| 30 H | -3.9671 | 1.1979  | 1.3032  |
| 31 H | -1.4592 | 0.5610  | 4.7576  |
| 32 H | -3.6001 | 1.4144  | 3.7730  |

/db/nbandeira/Fe(NPiso)/L=CO2/0e-/1-CO2

Energy (POTENTIAL) = -4061.04119678 Eh

|    | Atom | X       | Y       | Z       |
|----|------|---------|---------|---------|
| 1  | Fe   | -0.0487 | 0.0030  | -0.3122 |
| 2  | P    | -0.8412 | -2.2651 | -0.6985 |
| 3  | P    | -1.7185 | 1.7476  | -0.6822 |
| 4  | P    | 2.1597  | 0.6740  | -1.0950 |
| 5  | N    | -0.3201 | -0.0194 | -2.7062 |
| 6  | C    | 0.2441  | -1.2908 | -3.1004 |
| 7  | C    | 0.9889  | -1.3992 | -4.2763 |
| 8  | H    | 1.1552  | -0.5194 | -4.8946 |
| 9  | C    | 1.5196  | -2.6241 | -4.6647 |
| 10 | H    | 2.1017  | -2.6832 | -5.5848 |
| 11 | C    | 1.3042  | -3.7788 | -3.9035 |
| 12 | C    | 0.5478  | -3.6568 | -2.7348 |
| 13 | H    | 0.3752  | -4.5527 | -2.1396 |
| 14 | C    | 0.0257  | -2.4312 | -2.3061 |
| 15 | C    | 1.8859  | -5.1002 | -4.3136 |
| 16 | H    | 1.8373  | -5.2360 | -5.4021 |
| 17 | H    | 1.3601  | -5.9351 | -3.8337 |
| 18 | H    | 2.9458  | -5.1640 | -4.0240 |
| 19 | C    | -1.7470 | 0.0810  | -2.9238 |
| 20 | C    | -2.3613 | -0.6424 | -3.9453 |
| 21 | H    | -1.7693 | -1.3104 | -4.5684 |
| 22 | C    | -3.7305 | -0.5260 | -4.1641 |
| 23 | H    | -4.1934 | -1.1131 | -4.9577 |
| 24 | C    | -4.5165 | 0.3330  | -3.3881 |
| 25 | C    | -3.8845 | 1.0580  | -2.3716 |
| 26 | H    | -4.4948 | 1.7139  | -1.7514 |
| 27 | C    | -2.5148 | 0.9398  | -2.1163 |
| 28 | C    | -5.9870 | 0.4865  | -3.6464 |
| 29 | H    | -6.1635 | 1.2101  | -4.4569 |
| 30 | H    | -6.5146 | 0.8519  | -2.7565 |
| 31 | H    | -6.4391 | -0.4650 | -3.9548 |
| 32 | C    | 0.4016  | 1.1274  | -3.2167 |
| 33 | C    | -0.0922 | 1.8350  | -4.3150 |
| 34 | H    | -1.0115 | 1.5113  | -4.7988 |
| 35 | C    | 0.5689  | 2.9640  | -4.7842 |
| 36 | H    | 0.1586  | 3.5046  | -5.6375 |
| 37 | C    | 1.7465  | 3.4141  | -4.1759 |
| 38 | C    | 2.2422  | 2.6806  | -3.0944 |

|    |   |         |         |         |
|----|---|---------|---------|---------|
| 39 | H | 3.1551  | 3.0302  | -2.6180 |
| 40 | C | 1.5935  | 1.5429  | -2.5998 |
| 41 | C | 2.4397  | 4.6568  | -4.6532 |
| 42 | H | 3.4547  | 4.7329  | -4.2441 |
| 43 | H | 1.8846  | 5.5543  | -4.3417 |
| 44 | H | 2.5034  | 4.6796  | -5.7494 |
| 45 | C | -0.1359 | -3.6344 | 0.3454  |
| 46 | H | -0.3158 | -4.5766 | -0.1928 |
| 47 | C | 1.3665  | -3.4125 | 0.5023  |
| 48 | H | 1.5645  | -2.5044 | 1.0898  |
| 49 | H | 1.8924  | -3.3257 | -0.4557 |
| 50 | H | 1.8055  | -4.2593 | 1.0490  |
| 51 | C | -0.7922 | -3.7330 | 1.7231  |
| 52 | H | -0.2038 | -4.4245 | 2.3426  |
| 53 | H | -1.8144 | -4.1176 | 1.6833  |
| 54 | H | -0.8124 | -2.7652 | 2.2411  |
| 55 | C | -2.6383 | -2.6194 | -1.0857 |
| 56 | H | -2.9681 | -1.6830 | -1.5547 |
| 57 | C | -2.8026 | -3.7545 | -2.0901 |
| 58 | H | -2.4139 | -4.7036 | -1.6934 |
| 59 | H | -2.3006 | -3.5464 | -3.0428 |
| 60 | H | -3.8736 | -3.8946 | -2.2984 |
| 61 | C | -3.5030 | -2.8489 | 0.1535  |
| 62 | H | -4.5528 | -2.6636 | -0.1141 |
| 63 | H | -3.2489 | -2.1867 | 0.9893  |
| 64 | H | -3.4338 | -3.8870 | 0.5006  |
| 65 | C | -3.0666 | 1.9669  | 0.5719  |
| 66 | H | -3.8708 | 2.5355  | 0.0823  |
| 67 | C | -3.5987 | 0.6008  | 0.9924  |
| 68 | H | -2.8234 | 0.0120  | 1.5023  |
| 69 | H | -3.9706 | 0.0164  | 0.1422  |
| 70 | H | -4.4320 | 0.7335  | 1.6973  |
| 71 | C | -2.5768 | 2.7661  | 1.7794  |
| 72 | H | -3.3449 | 2.7289  | 2.5649  |
| 73 | H | -2.4060 | 3.8211  | 1.5394  |
| 74 | H | -1.6498 | 2.3515  | 2.1996  |
| 75 | C | -1.1658 | 3.4213  | -1.2818 |
| 76 | H | -0.5702 | 3.1649  | -2.1674 |
| 77 | C | -2.3308 | 4.2957  | -1.7302 |
| 78 | H | -2.9686 | 4.5916  | -0.8855 |
| 79 | H | -2.9563 | 3.7927  | -2.4799 |

|     |   |         |         |         |
|-----|---|---------|---------|---------|
| 80  | H | -1.9372 | 5.2152  | -2.1877 |
| 81  | C | -0.2414 | 4.1273  | -0.2911 |
| 82  | H | 0.3200  | 4.9106  | -0.8197 |
| 83  | H | 0.4868  | 3.4432  | 0.1630  |
| 84  | H | -0.7985 | 4.6102  | 0.5200  |
| 85  | C | 3.1137  | 1.9503  | -0.1200 |
| 86  | H | 2.5523  | 2.8718  | -0.3356 |
| 87  | C | 4.5725  | 2.1766  | -0.5167 |
| 88  | H | 4.9425  | 3.0612  | 0.0215  |
| 89  | H | 4.7178  | 2.3588  | -1.5870 |
| 90  | H | 5.2099  | 1.3320  | -0.2306 |
| 91  | C | 2.9912  | 1.6734  | 1.3785  |
| 92  | H | 3.4173  | 0.6994  | 1.6548  |
| 93  | H | 1.9466  | 1.7033  | 1.7092  |
| 94  | H | 3.5394  | 2.4469  | 1.9352  |
| 95  | C | 3.2791  | -0.7158 | -1.6522 |
| 96  | H | 2.5576  | -1.4773 | -1.9797 |
| 97  | C | 4.1681  | -0.3778 | -2.8429 |
| 98  | H | 4.9425  | 0.3561  | -2.5888 |
| 99  | H | 3.5889  | 0.0110  | -3.6902 |
| 100 | H | 4.6744  | -1.2950 | -3.1783 |
| 101 | C | 4.0582  | -1.3007 | -0.4749 |
| 102 | H | 4.4749  | -2.2740 | -0.7704 |
| 103 | H | 3.4250  | -1.4644 | 0.4058  |
| 104 | H | 4.8968  | -0.6609 | -0.1753 |
| 105 | C | 0.0791  | -0.2541 | 3.0531  |
| 106 | O | 0.1297  | -0.6210 | 4.1420  |
| 107 | O | 0.0267  | 0.1228  | 1.9513  |

/db/nbandeira/Fe(NPiso)/L=Cl/0e-/1-Cl

Energy (POTENTIAL) = -4334.24062118 Eh

|    | Atom | X       | Y       | Z       |
|----|------|---------|---------|---------|
| 1  | Fe   | -0.0013 | -0.0019 | 0.0032  |
| 2  | P    | -0.8459 | -2.2190 | -0.7083 |
| 3  | P    | -1.6605 | 1.6686  | -0.6524 |
| 4  | P    | 2.1307  | 0.6770  | -1.0699 |
| 5  | Cl   | 0.0050  | 0.0138  | 2.2714  |
| 6  | N    | -0.2985 | -0.0335 | -2.7650 |
| 7  | C    | 0.2674  | -1.2998 | -3.1182 |
| 8  | C    | 1.0341  | -1.4343 | -4.2793 |
| 9  | H    | 1.2089  | -0.5647 | -4.9103 |
| 10 | C    | 1.5722  | -2.6660 | -4.6330 |
| 11 | H    | 2.1740  | -2.7446 | -5.5391 |
| 12 | C    | 1.3375  | -3.8058 | -3.8543 |
| 13 | C    | 0.5566  | -3.6596 | -2.7046 |
| 14 | H    | 0.3697  | -4.5439 | -2.0964 |
| 15 | C    | 0.0340  | -2.4238 | -2.3054 |
| 16 | C    | 1.9252  | -5.1357 | -4.2298 |
| 17 | H    | 1.8041  | -5.3365 | -5.3030 |
| 18 | H    | 1.4551  | -5.9534 | -3.6693 |
| 19 | H    | 3.0042  | -5.1609 | -4.0154 |
| 20 | C    | -1.7192 | 0.0613  | -2.9410 |
| 21 | C    | -2.3519 | -0.6517 | -3.9613 |
| 22 | H    | -1.7642 | -1.3045 | -4.6048 |
| 23 | C    | -3.7252 | -0.5435 | -4.1535 |
| 24 | H    | -4.2006 | -1.1222 | -4.9461 |
| 25 | C    | -4.4988 | 0.3030  | -3.3517 |
| 26 | C    | -3.8497 | 1.0166  | -2.3378 |
| 27 | H    | -4.4541 | 1.6607  | -1.7001 |
| 28 | C    | -2.4756 | 0.9008  | -2.1027 |
| 29 | C    | -5.9750 | 0.4565  | -3.5792 |
| 30 | H    | -6.1721 | 1.2063  | -4.3610 |
| 31 | H    | -6.4890 | 0.7884  | -2.6682 |
| 32 | H    | -6.4287 | -0.4865 | -3.9109 |
| 33 | C    | 0.4151  | 1.1189  | -3.2346 |
| 34 | C    | -0.0761 | 1.8476  | -4.3229 |
| 35 | H    | -0.9805 | 1.5124  | -4.8272 |
| 36 | C    | 0.5569  | 3.0093  | -4.7470 |
| 37 | H    | 0.1434  | 3.5666  | -5.5882 |
| 38 | C    | 1.7093  | 3.4728  | -4.1020 |

|    |   |         |         |         |
|----|---|---------|---------|---------|
| 39 | C | 2.2047  | 2.7211  | -3.0331 |
| 40 | H | 3.0909  | 3.0921  | -2.5254 |
| 41 | C | 1.5839  | 1.5493  | -2.5821 |
| 42 | C | 2.3958  | 4.7312  | -4.5487 |
| 43 | H | 3.1468  | 5.0585  | -3.8190 |
| 44 | H | 1.6749  | 5.5476  | -4.6920 |
| 45 | H | 2.9071  | 4.5781  | -5.5109 |
| 46 | C | -0.1743 | -3.5970 | 0.3557  |
| 47 | H | -0.3975 | -4.5499 | -0.1471 |
| 48 | C | 1.3370  | -3.4247 | 0.4944  |
| 49 | H | 1.5651  | -2.4982 | 1.0411  |
| 50 | H | 1.8626  | -3.3952 | -0.4672 |
| 51 | H | 1.7502  | -4.2608 | 1.0771  |
| 52 | C | -0.8028 | -3.6163 | 1.7513  |
| 53 | H | -0.2442 | -4.3278 | 2.3770  |
| 54 | H | -1.8474 | -3.9369 | 1.7482  |
| 55 | H | -0.7402 | -2.6298 | 2.2306  |
| 56 | C | -2.6366 | -2.6004 | -1.1203 |
| 57 | H | -2.9788 | -1.6640 | -1.5796 |
| 58 | C | -2.7801 | -3.7250 | -2.1394 |
| 59 | H | -2.3751 | -4.6725 | -1.7547 |
| 60 | H | -2.2787 | -3.4970 | -3.0877 |
| 61 | H | -3.8478 | -3.8827 | -2.3538 |
| 62 | C | -3.5122 | -2.8632 | 0.1040  |
| 63 | H | -4.5644 | -2.7175 | -0.1797 |
| 64 | H | -3.2971 | -2.1927 | 0.9439  |
| 65 | H | -3.4093 | -3.8985 | 0.4523  |
| 66 | C | -3.0451 | 1.9297  | 0.5635  |
| 67 | H | -3.8279 | 2.5073  | 0.0507  |
| 68 | C | -3.6127 | 0.5798  | 0.9909  |
| 69 | H | -2.8504 | -0.0127 | 1.5146  |
| 70 | H | -3.9822 | -0.0069 | 0.1410  |
| 71 | H | -4.4545 | 0.7349  | 1.6817  |
| 72 | C | -2.5792 | 2.7319  | 1.7787  |
| 73 | H | -3.3757 | 2.7246  | 2.5369  |
| 74 | H | -2.3730 | 3.7796  | 1.5339  |
| 75 | H | -1.6805 | 2.2925  | 2.2329  |
| 76 | C | -1.1258 | 3.3553  | -1.2480 |
| 77 | H | -0.5250 | 3.1093  | -2.1323 |
| 78 | C | -2.2852 | 4.2354  | -1.6991 |
| 79 | H | -2.9249 | 4.5341  | -0.8568 |

|     |   |         |         |         |
|-----|---|---------|---------|---------|
| 80  | H | -2.9118 | 3.7327  | -2.4484 |
| 81  | H | -1.8913 | 5.1547  | -2.1577 |
| 82  | C | -0.2034 | 4.0596  | -0.2537 |
| 83  | H | 0.3711  | 4.8379  | -0.7764 |
| 84  | H | 0.5135  | 3.3691  | 0.2096  |
| 85  | H | -0.7617 | 4.5488  | 0.5530  |
| 86  | C | 3.1574  | 1.9317  | -0.1368 |
| 87  | H | 2.5903  | 2.8603  | -0.3026 |
| 88  | C | 4.5944  | 2.1542  | -0.6105 |
| 89  | H | 4.9966  | 3.0408  | -0.0986 |
| 90  | H | 4.6899  | 2.3244  | -1.6882 |
| 91  | H | 5.2411  | 1.3084  | -0.3493 |
| 92  | C | 3.1300  | 1.6391  | 1.3636  |
| 93  | H | 3.6427  | 0.6981  | 1.6049  |
| 94  | H | 2.1071  | 1.5709  | 1.7527  |
| 95  | H | 3.6506  | 2.4472  | 1.8982  |
| 96  | C | 3.2246  | -0.7338 | -1.6355 |
| 97  | H | 2.4887  | -1.4920 | -1.9353 |
| 98  | C | 4.0929  | -0.4257 | -2.8494 |
| 99  | H | 4.8894  | 0.2925  | -2.6195 |
| 100 | H | 3.5029  | -0.0287 | -3.6851 |
| 101 | H | 4.5715  | -1.3554 | -3.1918 |
| 102 | C | 4.0266  | -1.3165 | -0.4727 |
| 103 | H | 4.4300  | -2.2951 | -0.7699 |
| 104 | H | 3.4128  | -1.4702 | 0.4234  |
| 105 | H | 4.8765  | -0.6811 | -0.1960 |

/db/nbandeira/Fe(NPiso)/L=Cl/1e-/1-NCMe+Cl-

Energy (POTENTIAL) = -4466.88688474991977 Eh

|    | Atom | X       | Y       | Z       |
|----|------|---------|---------|---------|
| 1  | Fe   | -0.3091 | 1.4462  | 2.7758  |
| 2  | P    | -1.0323 | -0.6841 | 1.9364  |
| 3  | P    | -1.8704 | 3.0830  | 2.1366  |
| 4  | P    | 1.7833  | 2.1159  | 1.8220  |
| 5  | N    | -0.5123 | 1.5344  | -0.1086 |
| 6  | C    | 0.0706  | 0.2864  | -0.4675 |
| 7  | C    | 0.8639  | 0.1906  | -1.6159 |
| 8  | H    | 1.0268  | 1.0787  | -2.2246 |
| 9  | C    | 1.4404  | -1.0191 | -1.9864 |
| 10 | H    | 2.0601  | -1.0660 | -2.8830 |
| 11 | C    | 1.2166  | -2.1765 | -1.2327 |
| 12 | C    | 0.4096  | -2.0686 | -0.0955 |
| 13 | H    | 0.2370  | -2.9715 | 0.4888  |
| 14 | C    | -0.1514 | -0.8564 | 0.3242  |
| 15 | C    | 1.8458  | -3.4871 | -1.6125 |
| 16 | H    | 1.8551  | -3.6265 | -2.7021 |
| 17 | H    | 1.3129  | -4.3334 | -1.1601 |
| 18 | H    | 2.8912  | -3.5348 | -1.2707 |
| 19 | C    | -1.9228 | 1.6510  | -0.2796 |
| 20 | C    | -2.5555 | 1.0005  | -1.3419 |
| 21 | H    | -1.9619 | 0.3934  | -2.0242 |
| 22 | C    | -3.9289 | 1.1206  | -1.5327 |
| 23 | H    | -4.4033 | 0.5963  | -2.3634 |
| 24 | C    | -4.7009 | 1.9203  | -0.6840 |
| 25 | C    | -4.0502 | 2.5779  | 0.3675  |
| 26 | H    | -4.6554 | 3.1931  | 1.0329  |
| 27 | C    | -2.6788 | 2.4427  | 0.6090  |
| 28 | C    | -6.1877 | 2.0432  | -0.8621 |
| 29 | H    | -6.4821 | 1.8739  | -1.9061 |
| 30 | H    | -6.5479 | 3.0343  | -0.5561 |
| 31 | H    | -6.7180 | 1.2996  | -0.2473 |
| 32 | C    | 0.2335  | 2.6999  | -0.4505 |
| 33 | C    | -0.1891 | 3.5063  | -1.5133 |
| 34 | H    | -1.0726 | 3.2174  | -2.0806 |
| 35 | C    | 0.4863  | 4.6778  | -1.8346 |
| 36 | H    | 0.1276  | 5.2961  | -2.6585 |
| 37 | C    | 1.6184  | 5.0667  | -1.1099 |
| 38 | C    | 2.0375  | 4.2425  | -0.0607 |

|    |   |         |         |         |
|----|---|---------|---------|---------|
| 39 | H | 2.9057  | 4.5635  | 0.5083  |
| 40 | C | 1.3681  | 3.0654  | 0.2979  |
| 41 | C | 2.3703  | 6.3207  | -1.4553 |
| 42 | H | 3.0200  | 6.6382  | -0.6298 |
| 43 | H | 1.6850  | 7.1455  | -1.6930 |
| 44 | H | 3.0084  | 6.1654  | -2.3388 |
| 45 | C | -0.4040 | -2.1647 | 2.8973  |
| 46 | H | -0.5739 | -3.0696 | 2.2954  |
| 47 | C | 1.0925  | -1.9850 | 3.1362  |
| 48 | H | 1.2701  | -1.1099 | 3.7765  |
| 49 | H | 1.6619  | -1.8482 | 2.2094  |
| 50 | H | 1.4985  | -2.8671 | 3.6538  |
| 51 | C | -1.1120 | -2.3453 | 4.2410  |
| 52 | H | -0.5170 | -3.0249 | 4.8697  |
| 53 | H | -2.1075 | -2.7867 | 4.1402  |
| 54 | H | -1.2300 | -1.4037 | 4.7930  |
| 55 | C | -2.8128 | -1.0799 | 1.4571  |
| 56 | H | -3.1487 | -0.1272 | 1.0266  |
| 57 | C | -2.9327 | -2.1568 | 0.3843  |
| 58 | H | -2.5115 | -3.1149 | 0.7241  |
| 59 | H | -2.4278 | -1.8745 | -0.5476 |
| 60 | H | -3.9954 | -2.3270 | 0.1517  |
| 61 | C | -3.7317 | -1.4047 | 2.6361  |
| 62 | H | -4.7723 | -1.2013 | 2.3425  |
| 63 | H | -3.5251 | -0.8268 | 3.5444  |
| 64 | H | -3.6742 | -2.4692 | 2.8978  |
| 65 | C | -3.3042 | 3.3307  | 3.3061  |
| 66 | H | -4.0522 | 3.9699  | 2.8150  |
| 67 | C | -3.9338 | 1.9838  | 3.6410  |
| 68 | H | -3.2428 | 1.3583  | 4.2218  |
| 69 | H | -4.2383 | 1.4254  | 2.7474  |
| 70 | H | -4.8276 | 2.1320  | 4.2662  |
| 71 | C | -2.8435 | 4.0289  | 4.5860  |
| 72 | H | -3.6391 | 3.9669  | 5.3434  |
| 73 | H | -2.6237 | 5.0910  | 4.4290  |
| 74 | H | -1.9473 | 3.5502  | 5.0068  |
| 75 | C | -1.3480 | 4.8138  | 1.6339  |
| 76 | H | -0.7246 | 4.6150  | 0.7530  |
| 77 | C | -2.4992 | 5.7124  | 1.2004  |
| 78 | H | -3.1591 | 5.9674  | 2.0420  |
| 79 | H | -3.1093 | 5.2444  | 0.4157  |

|     |    |         |         |         |
|-----|----|---------|---------|---------|
| 80  | H  | -2.1038 | 6.6567  | 0.7956  |
| 81  | C  | -0.4549 | 5.4809  | 2.6781  |
| 82  | H  | 0.1270  | 6.2883  | 2.2095  |
| 83  | H  | 0.2536  | 4.7716  | 3.1252  |
| 84  | H  | -1.0369 | 5.9270  | 3.4938  |
| 85  | C  | 2.7809  | 3.3601  | 2.8268  |
| 86  | H  | 2.2406  | 4.2983  | 2.6314  |
| 87  | C  | 4.2530  | 3.5920  | 2.4824  |
| 88  | H  | 4.6150  | 4.4616  | 3.0517  |
| 89  | H  | 4.4368  | 3.7969  | 1.4222  |
| 90  | H  | 4.8790  | 2.7381  | 2.7666  |
| 91  | C  | 2.6319  | 3.0569  | 4.3178  |
| 92  | H  | 3.0711  | 2.0850  | 4.5829  |
| 93  | H  | 1.5797  | 3.0437  | 4.6247  |
| 94  | H  | 3.1505  | 3.8287  | 4.9065  |
| 95  | C  | 2.9636  | 0.7754  | 1.2342  |
| 96  | H  | 2.2649  | 0.0144  | 0.8596  |
| 97  | C  | 3.8861  | 1.1534  | 0.0812  |
| 98  | H  | 4.6362  | 1.8979  | 0.3751  |
| 99  | H  | 3.3254  | 1.5525  | -0.7737 |
| 100 | H  | 4.4244  | 0.2571  | -0.2640 |
| 101 | C  | 3.7267  | 0.1576  | 2.4052  |
| 102 | H  | 4.1417  | -0.8151 | 2.1024  |
| 103 | H  | 3.0854  | -0.0143 | 3.2783  |
| 104 | H  | 4.5669  | 0.7850  | 2.7264  |
| 105 | C  | -0.2390 | 1.1585  | 5.9132  |
| 106 | N  | -0.2294 | 1.2742  | 4.7600  |
| 107 | C  | -0.3121 | 0.9931  | 7.3456  |
| 108 | H  | 0.4835  | 0.3215  | 7.6941  |
| 109 | H  | -1.3045 | 0.5503  | 7.5587  |
| 110 | H  | -0.2124 | 1.9646  | 7.8478  |
| 111 | Cl | -3.3896 | -0.3621 | 6.7240  |

/db/nbandeira/Fe(NPiso)/1\_with\_vacancy\_+2e-

Energy (POTENTIAL) = -3872.88030638 Eh

|    | Atom | X       | Y       | Z       |
|----|------|---------|---------|---------|
| 1  | Fe   | -0.2132 | -0.0596 | 0.4070  |
| 2  | P    | 2.1341  | -0.0735 | 0.6200  |
| 3  | P    | -1.1418 | -2.0719 | 0.7393  |
| 4  | P    | -1.1267 | 1.9955  | 0.7960  |
| 5  | N    | 0.0054  | -0.1207 | 2.7228  |
| 6  | C    | 2.1602  | 0.9183  | 2.1678  |
| 7  | C    | 1.0528  | 0.8157  | 3.0285  |
| 8  | C    | 0.9738  | 1.6269  | 4.1594  |
| 9  | H    | 0.1059  | 1.5416  | 4.8125  |
| 10 | C    | 1.9826  | 2.5464  | 4.4419  |
| 11 | H    | 1.9000  | 3.1790  | 5.3269  |
| 12 | C    | 3.1058  | 2.6546  | 3.6154  |
| 13 | C    | 3.1798  | 1.8169  | 2.4950  |
| 14 | H    | 4.0591  | 1.8869  | 1.8541  |
| 15 | C    | 4.1903  | 3.6572  | 3.8942  |
| 16 | H    | 4.0569  | 4.5605  | 3.2790  |
| 17 | H    | 5.1834  | 3.2503  | 3.6602  |
| 18 | H    | 4.1847  | 3.9720  | 4.9458  |
| 19 | C    | 3.1672  | -1.5729 | 1.1469  |
| 20 | H    | 2.4149  | -2.2016 | 1.6464  |
| 21 | C    | 3.7445  | -2.3675 | -0.0211 |
| 22 | H    | 3.0047  | -2.5790 | -0.8013 |
| 23 | H    | 4.1222  | -3.3332 | 0.3482  |
| 24 | H    | 4.5928  | -1.8422 | -0.4824 |
| 25 | C    | 4.2677  | -1.2534 | 2.1532  |
| 26 | H    | 4.9960  | -0.5358 | 1.7460  |
| 27 | H    | 4.8168  | -2.1747 | 2.4034  |
| 28 | H    | 3.8682  | -0.8382 | 3.0861  |
| 29 | C    | 3.2276  | 0.8586  | -0.5820 |
| 30 | H    | 4.2717  | 0.7993  | -0.2350 |
| 31 | C    | 2.7997  | 2.3178  | -0.7024 |
| 32 | H    | 1.7758  | 2.3724  | -1.0956 |
| 33 | H    | 3.4617  | 2.8425  | -1.4079 |
| 34 | H    | 2.8170  | 2.8616  | 0.2485  |
| 35 | C    | 3.1103  | 0.2206  | -1.9708 |
| 36 | H    | 3.4793  | -0.8079 | -2.0165 |
| 37 | H    | 3.6865  | 0.8123  | -2.6982 |
| 38 | H    | 2.0601  | 0.2183  | -2.3016 |

|    |   |         |         |         |
|----|---|---------|---------|---------|
| 39 | C | -0.2233 | -2.5370 | 2.2660  |
| 40 | C | 0.2936  | -1.4890 | 3.0605  |
| 41 | C | 1.1086  | -1.7910 | 4.1547  |
| 42 | H | 1.5063  | -0.9811 | 4.7644  |
| 43 | C | 1.4254  | -3.1116 | 4.4650  |
| 44 | H | 2.0712  | -3.3205 | 5.3193  |
| 45 | C | 0.9174  | -4.1695 | 3.7025  |
| 46 | C | 0.0886  | -3.8537 | 2.6181  |
| 47 | H | -0.3023 | -4.6754 | 2.0174  |
| 48 | C | 1.2724  | -5.5964 | 4.0143  |
| 49 | H | 2.2622  | -5.8558 | 3.6073  |
| 50 | H | 0.5454  | -6.2940 | 3.5784  |
| 51 | H | 1.3122  | -5.7733 | 5.0979  |
| 52 | C | -0.9541 | -3.5659 | -0.3671 |
| 53 | H | -1.2884 | -4.4575 | 0.1839  |
| 54 | C | -1.8241 | -3.4146 | -1.6138 |
| 55 | H | -2.8956 | -3.4628 | -1.3862 |
| 56 | H | -1.6009 | -4.2237 | -2.3257 |
| 57 | H | -1.6279 | -2.4587 | -2.1238 |
| 58 | C | 0.5082  | -3.7349 | -0.7589 |
| 59 | H | 0.8539  | -2.8662 | -1.3374 |
| 60 | H | 0.6348  | -4.6312 | -1.3855 |
| 61 | H | 1.1638  | -3.8374 | 0.1153  |
| 62 | C | -2.9265 | -2.1398 | 1.3359  |
| 63 | H | -2.8651 | -1.5443 | 2.2577  |
| 64 | C | -3.8825 | -1.4085 | 0.3997  |
| 65 | H | -3.4767 | -0.4230 | 0.1331  |
| 66 | H | -4.8509 | -1.2529 | 0.8993  |
| 67 | H | -4.0752 | -1.9670 | -0.5266 |
| 68 | C | -3.4161 | -3.5364 | 1.6992  |
| 69 | H | -3.5381 | -4.1723 | 0.8104  |
| 70 | H | -4.3981 | -3.4752 | 2.1935  |
| 71 | H | -2.7293 | -4.0456 | 2.3900  |
| 72 | C | -1.9931 | 1.2427  | 2.1902  |
| 73 | C | -1.3273 | 0.3216  | 3.0669  |
| 74 | C | -1.9754 | -0.2223 | 4.1625  |
| 75 | H | -1.4360 | -0.9310 | 4.7914  |
| 76 | C | -3.3222 | 0.0765  | 4.4437  |
| 77 | H | -3.8142 | -0.3625 | 5.3120  |
| 78 | C | -4.0219 | 0.9574  | 3.5886  |
| 79 | C | -3.3574 | 1.5312  | 2.5137  |

|     |   |         |        |         |
|-----|---|---------|--------|---------|
| 80  | H | -3.9223 | 2.2047 | 1.8717  |
| 81  | C | 0.1472  | 4.5376 | 0.3251  |
| 82  | H | 0.6046  | 4.0128 | -0.5223 |
| 83  | H | 0.8944  | 5.2480 | 0.7128  |
| 84  | H | -0.6903 | 5.1302 | -0.0636 |
| 85  | C | -2.4798 | 2.5113 | -0.4002 |
| 86  | H | -3.1978 | 1.6834 | -0.2920 |
| 87  | C | -3.2287 | 3.8207 | -0.1580 |
| 88  | H | -3.6279 | 3.9065 | 0.8593  |
| 89  | H | -4.0796 | 3.8880 | -0.8539 |
| 90  | H | -2.5941 | 4.6964 | -0.3393 |
| 91  | C | -1.9314 | 2.4568 | -1.8272 |
| 92  | H | -1.1608 | 3.2228 | -1.9965 |
| 93  | H | -2.7391 | 2.6314 | -2.5551 |
| 94  | H | -1.4841 | 1.4755 | -2.0441 |
| 95  | C | -0.2889 | 3.5818 | 1.4320  |
| 96  | H | 0.6236  | 3.1599 | 1.8789  |
| 97  | C | -1.0550 | 4.2937 | 2.5405  |
| 98  | H | -1.9731 | 4.7673 | 2.1677  |
| 99  | H | -0.4299 | 5.0848 | 2.9858  |
| 100 | H | -1.3364 | 3.5971 | 3.3414  |
| 101 | C | -5.4738 | 1.2597 | 3.8427  |
| 102 | H | -5.6377 | 1.6102 | 4.8733  |
| 103 | H | -6.0969 | 0.3607 | 3.7126  |
| 104 | H | -5.8518 | 2.0307 | 3.1582  |

/db/nbandeira/Fe(NPiso)/BIH/0e-/BIH

Energy (POTENTIAL) = -689.53956096799789 Eh

| Atom | X       | Y       | Z       |
|------|---------|---------|---------|
| 1 C  | 1.3577  | -3.0862 | -1.4175 |
| 2 C  | 2.6477  | -3.5971 | -1.1490 |
| 3 C  | 1.0535  | -1.8095 | -0.9721 |
| 4 H  | 2.9032  | -4.5998 | -1.4931 |
| 5 C  | 3.5800  | -2.8465 | -0.4431 |
| 6 C  | 2.0047  | -1.0434 | -0.2537 |
| 7 H  | 4.5668  | -3.2603 | -0.2334 |
| 8 C  | 3.2634  | -1.5511 | 0.0251  |
| 9 H  | 3.9900  | -0.9718 | 0.5942  |
| 10 H | 0.6218  | -3.6848 | -1.9536 |
| 11 N | -0.0887 | -1.0471 | -1.1011 |
| 12 N | 1.4292  | 0.1764  | 0.0377  |
| 13 C | 1.9553  | 1.0952  | 1.0047  |
| 14 H | 1.8331  | 0.7446  | 2.0454  |
| 15 H | 3.0251  | 1.2574  | 0.8188  |
| 16 H | 1.4465  | 2.0626  | 0.9059  |
| 17 C | -1.3588 | -1.5658 | -1.5166 |
| 18 H | -2.0334 | -0.7343 | -1.7582 |
| 19 H | -1.2335 | -2.1714 | -2.4237 |
| 20 H | -1.8442 | -2.1917 | -0.7463 |
| 21 C | -0.0028 | 0.1122  | -0.2263 |
| 22 H | -0.3348 | 1.0224  | -0.7580 |
| 23 C | -0.8399 | -0.0163 | 1.0408  |
| 24 C | -1.7315 | 0.9945  | 1.4024  |
| 25 C | -0.7093 | -1.1409 | 1.8669  |
| 26 C | -2.4857 | 0.8931  | 2.5746  |
| 27 C | -1.4599 | -1.2465 | 3.0364  |
| 28 C | -2.3501 | -0.2281 | 3.3934  |
| 29 H | -1.8365 | 1.8704  | 0.7590  |
| 30 H | -0.0180 | -1.9387 | 1.5920  |
| 31 H | -3.1791 | 1.6893  | 2.8467  |
| 32 H | -1.3525 | -2.1255 | 3.6725  |
| 33 H | -2.9370 | -0.3120 | 4.3085  |

/db/nbandeira/Fe(NPiso)/L=CO2/CO2

Energy (POTENTIAL) = -188.11766132012451 Eh

|   | Atom | X       | Y       | Z       |
|---|------|---------|---------|---------|
| 1 | C    | -0.0000 | 0.0000  | 0.0000  |
| 2 | O    | 0.0000  | -0.0000 | -1.1593 |
| 3 | O    | 0.0000  | -0.0000 | 1.1593  |

/db/nbandeira/Fe(NPiso)/\_Ir(ppy)2(dtb-bpy)\_+/0e-/triplet\_state

Energy (POTENTIAL) = -19596.21153441006027 Eh

| Atom | X       | Y       | Z       |
|------|---------|---------|---------|
| 1 C  | -1.4868 | 2.7648  | -0.1884 |
| 2 H  | -0.4823 | 3.1946  | -0.2127 |
| 3 C  | -2.5927 | 3.5759  | -0.2898 |
| 4 C  | -3.8986 | 2.9960  | -0.2410 |
| 5 C  | -3.9661 | 1.6288  | -0.1027 |
| 6 H  | -4.9335 | 1.1295  | -0.0643 |
| 7 C  | -2.7969 | 0.8241  | -0.0090 |
| 8 C  | -2.8057 | -0.5902 | 0.1180  |
| 9 C  | -3.9780 | -1.3867 | 0.1884  |
| 10 H | -4.9452 | -0.8848 | 0.1270  |
| 11 C | -3.9251 | -2.7573 | 0.3364  |
| 12 C | -2.6315 | -3.3458 | 0.4158  |
| 13 C | -1.5159 | -2.5397 | 0.3332  |
| 14 H | -0.5158 | -2.9778 | 0.3807  |
| 15 C | 1.4391  | 1.5504  | -0.0850 |
| 16 C | 2.0899  | 2.2512  | 0.9480  |
| 17 H | 1.8795  | 2.0041  | 1.9919  |
| 18 C | 3.0051  | 3.2563  | 0.6556  |
| 19 H | 3.5094  | 3.7901  | 1.4667  |
| 20 C | 3.2855  | 3.5899  | -0.6765 |
| 21 H | 4.0039  | 4.3834  | -0.9013 |
| 22 C | 2.6515  | 2.9181  | -1.7211 |
| 23 H | 2.8844  | 3.1910  | -2.7536 |
| 24 C | 1.7300  | 1.9096  | -1.4338 |
| 25 C | 1.0084  | 1.1464  | -2.4503 |
| 26 C | 1.1112  | 1.3235  | -3.8311 |
| 27 H | 1.7803  | 2.0856  | -4.2332 |
| 28 C | 0.3576  | 0.5260  | -4.6838 |
| 29 H | 0.4328  | 0.6571  | -5.7666 |
| 30 C | -0.4922 | -0.4372 | -4.1425 |
| 31 H | -1.1037 | -1.0847 | -4.7742 |
| 32 C | -0.5547 | -0.5689 | -2.7625 |
| 33 H | -1.1993 | -1.3072 | -2.2820 |
| 34 C | 1.4222  | -1.3545 | 0.2940  |
| 35 C | 2.0913  | -2.0627 | -0.7221 |
| 36 H | 1.9070  | -1.8163 | -1.7711 |
| 37 C | 2.9916  | -3.0741 | -0.4062 |
| 38 H | 3.5106  | -3.6137 | -1.2042 |

|    |    |         |         |         |
|----|----|---------|---------|---------|
| 39 | C  | 3.2384  | -3.4067 | 0.9328  |
| 40 | H  | 3.9453  | -4.2051 | 1.1759  |
| 41 | C  | 2.5854  | -2.7279 | 1.9610  |
| 42 | H  | 2.7922  | -3.0004 | 2.9992  |
| 43 | C  | 1.6783  | -1.7131 | 1.6501  |
| 44 | C  | 0.9389  | -0.9423 | 2.6483  |
| 45 | C  | 1.0070  | -1.1182 | 4.0313  |
| 46 | H  | 1.6598  | -1.8854 | 4.4502  |
| 47 | C  | 0.2399  | -0.3132 | 4.8648  |
| 48 | H  | 0.2882  | -0.4434 | 5.9493  |
| 49 | C  | -0.5888 | 0.6562  | 4.3023  |
| 50 | H  | -1.2099 | 1.3095  | 4.9185  |
| 51 | C  | -0.6175 | 0.7863  | 2.9210  |
| 52 | H  | -1.2447 | 1.5286  | 2.4239  |
| 53 | Ir | 0.1027  | 0.1040  | 0.0882  |
| 54 | N  | -1.5551 | 1.4290  | -0.0400 |
| 55 | N  | -1.5704 | -1.2072 | 0.1785  |
| 56 | N  | 0.1779  | 0.1972  | -1.9468 |
| 57 | N  | 0.1283  | 0.0130  | 2.1242  |
| 58 | H  | -2.4452 | 4.6518  | -0.3986 |
| 59 | H  | -2.4888 | -4.4193 | 0.5337  |
| 60 | C  | -5.1291 | 3.8899  | -0.3346 |
| 61 | C  | -5.2123 | -3.5794 | 0.4045  |
| 62 | C  | -4.9295 | -5.0718 | 0.5929  |
| 63 | H  | -5.8839 | -5.6243 | 0.6402  |
| 64 | H  | -4.3434 | -5.4865 | -0.2454 |
| 65 | H  | -4.3803 | -5.2692 | 1.5299  |
| 66 | C  | -5.9961 | -3.3929 | -0.9042 |
| 67 | H  | -5.4020 | -3.7347 | -1.7703 |
| 68 | H  | -6.9312 | -3.9811 | -0.8754 |
| 69 | H  | -6.2651 | -2.3356 | -1.0700 |
| 70 | C  | -5.0840 | 4.6706  | -1.6583 |
| 71 | H  | -4.1808 | 5.2999  | -1.7328 |
| 72 | H  | -5.0940 | 3.9814  | -2.5213 |
| 73 | H  | -5.9645 | 5.3333  | -1.7368 |
| 74 | C  | -6.4316 | 3.0898  | -0.2846 |
| 75 | H  | -7.2916 | 3.7784  | -0.3535 |
| 76 | H  | -6.5046 | 2.3760  | -1.1235 |
| 77 | H  | -6.5284 | 2.5260  | 0.6594  |
| 78 | C  | -5.1151 | 4.8778  | 0.8431  |
| 79 | H  | -5.9926 | 5.5469  | 0.7880  |

|    |   |         |         |        |
|----|---|---------|---------|--------|
| 80 | H | -5.1532 | 4.3395  | 1.8068 |
| 81 | H | -4.2093 | 5.5081  | 0.8389 |
| 82 | C | -6.0649 | -3.0923 | 1.5867 |
| 83 | H | -6.3414 | -2.0294 | 1.4803 |
| 84 | H | -6.9982 | -3.6803 | 1.6482 |
| 85 | H | -5.5201 | -3.2112 | 2.5401 |

/db/nbandeira/Fe(NPiso)/\_Ir(ppy)2(dtb-bpy)\_+/1e-/Ir(ppy)2(dtb-bpy)\_+1e-+1H+

Energy (POTENTIAL) = -19597.23307627491886 Eh

| Atom | X       | Y       | Z       |
|------|---------|---------|---------|
| 1 C  | -1.6366 | 2.7455  | -0.3448 |
| 2 H  | -0.6302 | 3.1710  | -0.3611 |
| 3 C  | -2.7589 | 3.5450  | -0.4705 |
| 4 C  | -4.0387 | 2.9694  | -0.4424 |
| 5 C  | -4.0945 | 1.5840  | -0.2892 |
| 6 H  | -5.0545 | 1.0706  | -0.2722 |
| 7 C  | -2.9263 | 0.8316  | -0.1660 |
| 8 C  | -2.9175 | -0.6356 | 0.0031  |
| 9 C  | -4.0379 | -1.3726 | 0.2645  |
| 10 H | -5.0047 | -0.8723 | 0.3322  |
| 11 C | -3.9838 | -2.8306 | 0.5390  |
| 12 C | -2.6542 | -3.3835 | 0.1736  |
| 13 C | -1.5883 | -2.5719 | -0.0792 |
| 14 H | -0.5945 | -2.9815 | -0.2760 |
| 15 C | 1.3948  | 1.4886  | -0.0105 |
| 16 C | 2.0014  | 2.0997  | 1.0971  |
| 17 H | 1.7008  | 1.8140  | 2.1099  |
| 18 C | 2.9886  | 3.0728  | 0.9364  |
| 19 H | 3.4441  | 3.5342  | 1.8191  |
| 20 C | 3.4031  | 3.4633  | -0.3417 |
| 21 H | 4.1771  | 4.2265  | -0.4636 |
| 22 C | 2.8239  | 2.8721  | -1.4594 |
| 23 H | 3.1492  | 3.1775  | -2.4582 |
| 24 C | 1.8317  | 1.8944  | -1.2972 |
| 25 C | 1.1660  | 1.2233  | -2.4107 |
| 26 C | 1.4217  | 1.4421  | -3.7684 |
| 27 H | 2.1769  | 2.1718  | -4.0646 |
| 28 C | 0.7175  | 0.7314  | -4.7302 |
| 29 H | 0.9159  | 0.8982  | -5.7925 |
| 30 C | -0.2437 | -0.1947 | -4.3227 |
| 31 H | -0.8238 | -0.7770 | -5.0415 |
| 32 C | -0.4579 | -0.3704 | -2.9650 |
| 33 H | -1.1973 | -1.0818 | -2.5923 |
| 34 C | 1.3558  | -1.3030 | 0.2019  |
| 35 C | 2.1495  | -1.9112 | -0.7821 |
| 36 H | 2.0571  | -1.6002 | -1.8272 |
| 37 C | 3.0615  | -2.9161 | -0.4558 |
| 38 H | 3.6681  | -3.3742 | -1.2442 |

|    |    |         |         |         |
|----|----|---------|---------|---------|
| 39 | C  | 3.2084  | -3.3429 | 0.8685  |
| 40 | H  | 3.9236  | -4.1315 | 1.1198  |
| 41 | C  | 2.4384  | -2.7553 | 1.8665  |
| 42 | H  | 2.5553  | -3.0887 | 2.9017  |
| 43 | C  | 1.5233  | -1.7447 | 1.5387  |
| 44 | C  | 0.6782  | -1.0689 | 2.5194  |
| 45 | C  | 0.6558  | -1.3252 | 3.8944  |
| 46 | H  | 1.3044  | -2.0979 | 4.3096  |
| 47 | C  | -0.1867 | -0.5962 | 4.7222  |
| 48 | H  | -0.2067 | -0.7939 | 5.7975  |
| 49 | C  | -1.0008 | 0.3904  | 4.1648  |
| 50 | H  | -1.6759 | 0.9936  | 4.7751  |
| 51 | C  | -0.9426 | 0.5978  | 2.7959  |
| 52 | H  | -1.5580 | 1.3575  | 2.3112  |
| 53 | Ir | -0.0530 | 0.0990  | -0.0315 |
| 54 | N  | -1.7137 | 1.4180  | -0.1901 |
| 55 | N  | -1.6745 | -1.2165 | -0.0987 |
| 56 | N  | 0.2257  | 0.3142  | -2.0369 |
| 57 | N  | -0.1340 | -0.1115 | 1.9966  |
| 58 | H  | -2.6196 | 4.6215  | -0.5897 |
| 59 | H  | -2.5070 | -4.4656 | 0.1497  |
| 60 | C  | -5.2835 | 3.8390  | -0.5684 |
| 61 | C  | -4.3796 | -3.1600 | 2.0459  |
| 62 | C  | -4.3773 | -4.6777 | 2.2375  |
| 63 | H  | -4.7436 | -4.9223 | 3.2500  |
| 64 | H  | -5.0405 | -5.1747 | 1.5069  |
| 65 | H  | -3.3668 | -5.1088 | 2.1385  |
| 66 | C  | -5.7883 | -2.6292 | 2.3189  |
| 67 | H  | -6.5142 | -3.0271 | 1.5872  |
| 68 | H  | -6.1141 | -2.9432 | 3.3262  |
| 69 | H  | -5.8332 | -1.5274 | 2.2875  |
| 70 | C  | -5.2178 | 4.6162  | -1.8929 |
| 71 | H  | -4.3313 | 5.2710  | -1.9426 |
| 72 | H  | -5.1867 | 3.9258  | -2.7541 |
| 73 | H  | -6.1139 | 5.2533  | -1.9942 |
| 74 | C  | -6.5690 | 3.0104  | -0.5470 |
| 75 | H  | -7.4385 | 3.6830  | -0.6424 |
| 76 | H  | -6.6068 | 2.2926  | -1.3845 |
| 77 | H  | -6.6811 | 2.4513  | 0.3980  |
| 78 | C  | -5.3090 | 4.8247  | 0.6112  |
| 79 | H  | -6.2033 | 5.4686  | 0.5397  |

|    |   |         |         |         |
|----|---|---------|---------|---------|
| 80 | H | -5.3485 | 4.2856  | 1.5741  |
| 81 | H | -4.4205 | 5.4790  | 0.6181  |
| 82 | C | -3.3811 | -2.5100 | 3.0046  |
| 83 | H | -3.3729 | -1.4108 | 2.8992  |
| 84 | H | -3.6535 | -2.7462 | 4.0485  |
| 85 | H | -2.3542 | -2.8784 | 2.8322  |
| 86 | H | -4.7706 | -3.3369 | -0.0587 |

/db/nbandeira/Fe(NPiso)/NCMe\_substitution\_/1e-/1-Cl+NCMe

Energy (POTENTIAL) = -4456.33950670902868 Eh

| Atom | X       | Y       | Z       |
|------|---------|---------|---------|
| 1 Fe | -0.0321 | -0.0789 | 0.0712  |
| 2 P  | -0.7476 | -2.2163 | -0.7124 |
| 3 P  | -1.6250 | 1.5229  | -0.5651 |
| 4 P  | 2.0363  | 0.5396  | -0.9525 |
| 5 Cl | 0.0765  | -0.1865 | 2.4509  |
| 6 N  | -0.3242 | -0.0541 | -2.8191 |
| 7 C  | 0.2485  | -1.3054 | -3.1816 |
| 8 C  | 0.9855  | -1.4228 | -4.3643 |
| 9 H  | 1.1172  | -0.5462 | -4.9970 |
| 10 C | 1.5455  | -2.6404 | -4.7359 |
| 11 H | 2.1228  | -2.7068 | -5.6592 |
| 12 C | 1.3578  | -3.7822 | -3.9486 |
| 13 C | 0.6046  | -3.6521 | -2.7768 |
| 14 H | 0.4547  | -4.5431 | -2.1677 |
| 15 C | 0.0667  | -2.4302 | -2.3553 |
| 16 C | 1.9687  | -5.1006 | -4.3321 |
| 17 H | 1.9288  | -5.2607 | -5.4181 |
| 18 H | 1.4565  | -5.9375 | -3.8401 |
| 19 H | 3.0285  | -5.1436 | -4.0369 |
| 20 C | -1.7396 | 0.0528  | -2.9542 |
| 21 C | -2.3983 | -0.6264 | -3.9830 |
| 22 H | -1.8203 | -1.2453 | -4.6679 |
| 23 C | -3.7786 | -0.5304 | -4.1311 |
| 24 H | -4.2719 | -1.0828 | -4.9321 |
| 25 C | -4.5346 | 0.2742  | -3.2722 |
| 26 C | -3.8603 | 0.9541  | -2.2505 |
| 27 H | -4.4547 | 1.5620  | -1.5689 |
| 28 C | -2.4788 | 0.8469  | -2.0536 |
| 29 C | -6.0201 | 0.4198  | -3.4467 |
| 30 H | -6.2540 | 1.1826  | -4.2055 |
| 31 H | -6.5053 | 0.7283  | -2.5116 |
| 32 H | -6.4789 | -0.5205 | -3.7805 |
| 33 C | 0.4058  | 1.1171  | -3.1783 |
| 34 C | -0.0482 | 1.9103  | -4.2382 |
| 35 H | -0.9262 | 1.5922  | -4.7985 |
| 36 C | 0.5809  | 3.1077  | -4.5598 |
| 37 H | 0.1960  | 3.7149  | -5.3802 |
| 38 C | 1.6942  | 3.5390  | -3.8313 |

|    |   |         |         |         |
|----|---|---------|---------|---------|
| 39 | C | 2.1537  | 2.7214  | -2.7933 |
| 40 | H | 3.0083  | 3.0761  | -2.2244 |
| 41 | C | 1.5408  | 1.5115  | -2.4427 |
| 42 | C | 2.3893  | 4.8296  | -4.1619 |
| 43 | H | 3.0122  | 5.1740  | -3.3265 |
| 44 | H | 1.6684  | 5.6218  | -4.4051 |
| 45 | H | 3.0461  | 4.7101  | -5.0373 |
| 46 | C | -0.1040 | -3.6848 | 0.2617  |
| 47 | H | -0.3879 | -4.6067 | -0.2688 |
| 48 | C | 1.4162  | -3.6000 | 0.3762  |
| 49 | H | 1.6958  | -2.7287 | 0.9840  |
| 50 | H | 1.9249  | -3.5130 | -0.5909 |
| 51 | H | 1.8027  | -4.4980 | 0.8817  |
| 52 | C | -0.6868 | -3.7294 | 1.6770  |
| 53 | H | -0.1578 | -4.5010 | 2.2574  |
| 54 | H | -1.7511 | -3.9762 | 1.7029  |
| 55 | H | -0.5439 | -2.7662 | 2.1869  |
| 56 | C | -2.5366 | -2.6585 | -1.1443 |
| 57 | H | -2.9028 | -1.7192 | -1.5798 |
| 58 | C | -2.6727 | -3.7553 | -2.1946 |
| 59 | H | -2.2248 | -4.7012 | -1.8544 |
| 60 | H | -2.2034 | -3.4815 | -3.1472 |
| 61 | H | -3.7394 | -3.9474 | -2.3901 |
| 62 | C | -3.4148 | -2.9789 | 0.0637  |
| 63 | H | -4.4714 | -2.8507 | -0.2158 |
| 64 | H | -3.2211 | -2.3362 | 0.9293  |
| 65 | H | -3.2896 | -4.0229 | 0.3805  |
| 66 | C | -3.0237 | 1.7628  | 0.6517  |
| 67 | H | -3.8191 | 2.3495  | 0.1693  |
| 68 | C | -3.5758 | 0.4012  | 1.0573  |
| 69 | H | -2.7882 | -0.2015 | 1.5288  |
| 70 | H | -3.9655 | -0.1616 | 0.1999  |
| 71 | H | -4.3952 | 0.5217  | 1.7829  |
| 72 | C | -2.5412 | 2.5317  | 1.8818  |
| 73 | H | -3.3189 | 2.5026  | 2.6602  |
| 74 | H | -2.3390 | 3.5865  | 1.6621  |
| 75 | H | -1.6308 | 2.0792  | 2.3002  |
| 76 | C | -1.1876 | 3.2649  | -1.1241 |
| 77 | H | -0.6614 | 3.0747  | -2.0685 |
| 78 | C | -2.3889 | 4.1514  | -1.4291 |
| 79 | H | -2.9447 | 4.4189  | -0.5191 |

|     |   |         |         |         |
|-----|---|---------|---------|---------|
| 80  | H | -3.0876 | 3.6667  | -2.1251 |
| 81  | H | -2.0532 | 5.0905  | -1.8958 |
| 82  | C | -0.1888 | 3.9345  | -0.1844 |
| 83  | H | 0.2614  | 4.8100  | -0.6761 |
| 84  | H | 0.6225  | 3.2465  | 0.0856  |
| 85  | H | -0.6567 | 4.2824  | 0.7448  |
| 86  | C | 3.1363  | 1.7420  | -0.0065 |
| 87  | H | 2.5684  | 2.6818  | -0.0829 |
| 88  | C | 4.5576  | 2.0072  | -0.5073 |
| 89  | H | 4.9736  | 2.8647  | 0.0436  |
| 90  | H | 4.6238  | 2.2402  | -1.5755 |
| 91  | H | 5.2176  | 1.1526  | -0.3161 |
| 92  | C | 3.1739  | 1.3614  | 1.4742  |
| 93  | H | 3.7359  | 0.4308  | 1.6360  |
| 94  | H | 2.1684  | 1.2145  | 1.8881  |
| 95  | H | 3.6790  | 2.1549  | 2.0463  |
| 96  | C | 3.1687  | -0.7979 | -1.6474 |
| 97  | H | 2.4410  | -1.5512 | -1.9770 |
| 98  | C | 4.0085  | -0.4130 | -2.8601 |
| 99  | H | 4.7937  | 0.3113  | -2.6105 |
| 100 | H | 3.3947  | 0.0140  | -3.6634 |
| 101 | H | 4.5025  | -1.3114 | -3.2622 |
| 102 | C | 4.0138  | -1.4398 | -0.5484 |
| 103 | H | 4.4155  | -2.3997 | -0.9066 |
| 104 | H | 3.4325  | -1.6442 | 0.3588  |
| 105 | H | 4.8691  | -0.8142 | -0.2649 |
| 106 | C | -3.2518 | -1.4849 | 4.2326  |
| 107 | N | -3.6818 | -2.4662 | 3.7910  |
| 108 | C | -2.6967 | -0.2557 | 4.7656  |
| 109 | H | -1.7468 | -0.0432 | 4.2512  |
| 110 | H | -2.5174 | -0.3560 | 5.8438  |
| 111 | H | -3.3905 | 0.5770  | 4.5930  |

/db/nbandeira/Fe(NPiso)/L=CO2/H2O

Energy (POTENTIAL) = -76.32431195 Eh

|   | Atom | X      | Y       | Z       |
|---|------|--------|---------|---------|
| 1 | O    | 0.0000 | -0.0000 | -0.0645 |
| 2 | H    | 0.0000 | 0.7616  | 0.5283  |
| 3 | H    | 0.0000 | -0.7616 | 0.5283  |

/db/nbandeira/Fe(NPiso)/L=CO2/2e-/1-CO2+2e-

Energy (POTENTIAL) = -4061.27922043 Eh

| Atom | X       | Y       | Z       |
|------|---------|---------|---------|
| 1 Fe | -0.0168 | 0.0196  | 0.1107  |
| 2 P  | -0.6031 | -2.1247 | -0.6407 |
| 3 P  | -1.6168 | 1.5585  | -0.5953 |
| 4 P  | 1.9682  | 0.6841  | -1.0173 |
| 5 N  | -0.2971 | -0.0621 | -2.8587 |
| 6 C  | 0.2733  | -1.3225 | -3.1906 |
| 7 C  | 0.9828  | -1.4823 | -4.3838 |
| 8 H  | 1.1250  | -0.6239 | -5.0387 |
| 9 C  | 1.4953  | -2.7248 | -4.7452 |
| 10 H | 2.0515  | -2.8259 | -5.6781 |
| 11 C | 1.2820  | -3.8462 | -3.9380 |
| 12 C | 0.5824  | -3.6653 | -2.7390 |
| 13 H | 0.4363  | -4.5375 | -2.1025 |
| 14 C | 0.1013  | -2.4191 | -2.3242 |
| 15 C | 1.7720  | -5.2092 | -4.3390 |
| 16 H | 0.9454  | -5.8279 | -4.7211 |
| 17 H | 2.2089  | -5.7459 | -3.4857 |
| 18 H | 2.5300  | -5.1453 | -5.1302 |
| 19 C | -1.7118 | 0.0433  | -2.9823 |
| 20 C | -2.3799 | -0.6555 | -3.9918 |
| 21 H | -1.8151 | -1.3251 | -4.6391 |
| 22 C | -3.7494 | -0.5004 | -4.1778 |
| 23 H | -4.2525 | -1.0657 | -4.9637 |
| 24 C | -4.4782 | 0.3927  | -3.3857 |
| 25 C | -3.7961 | 1.0741  | -2.3712 |
| 26 H | -4.3757 | 1.7459  | -1.7403 |
| 27 C | -2.4306 | 0.8923  | -2.1181 |
| 28 C | -5.9449 | 0.6236  | -3.6172 |
| 29 H | -6.1048 | 1.3817  | -4.3996 |
| 30 H | -6.4431 | 0.9819  | -2.7069 |
| 31 H | -6.4477 | -0.2949 | -3.9479 |
| 32 C | 0.4107  | 1.0937  | -3.2967 |
| 33 C | -0.0574 | 1.8280  | -4.3930 |
| 34 H | -0.9458 | 1.4865  | -4.9220 |
| 35 C | 0.5807  | 2.9951  | -4.7929 |
| 36 H | 0.1907  | 3.5574  | -5.6425 |
| 37 C | 1.7162  | 3.4535  | -4.1138 |
| 38 C | 2.1795  | 2.7013  | -3.0306 |

|    |   |         |         |         |
|----|---|---------|---------|---------|
| 39 | H | 3.0452  | 3.0806  | -2.4957 |
| 40 | C | 1.5475  | 1.5283  | -2.5951 |
| 41 | C | 2.4109  | 4.7176  | -4.5346 |
| 42 | H | 3.2072  | 4.9901  | -3.8302 |
| 43 | H | 1.7050  | 5.5585  | -4.5943 |
| 44 | H | 2.8650  | 4.6072  | -5.5306 |
| 45 | C | 0.0619  | -3.6044 | 0.3088  |
| 46 | H | -0.3057 | -4.5051 | -0.2063 |
| 47 | C | 1.5885  | -3.6044 | 0.3152  |
| 48 | H | 1.9576  | -2.7586 | 0.9084  |
| 49 | H | 2.0384  | -3.5378 | -0.6821 |
| 50 | H | 1.9561  | -4.5276 | 0.7881  |
| 51 | C | -0.4074 | -3.6646 | 1.7637  |
| 52 | H | 0.0177  | -4.5662 | 2.2304  |
| 53 | H | -1.4927 | -3.7147 | 1.8749  |
| 54 | H | -0.0486 | -2.7968 | 2.3304  |
| 55 | C | -2.4244 | -2.5172 | -0.9385 |
| 56 | H | -2.7752 | -1.5912 | -1.4126 |
| 57 | C | -2.6711 | -3.6699 | -1.9050 |
| 58 | H | -2.2559 | -4.6158 | -1.5258 |
| 59 | H | -2.2392 | -3.4817 | -2.8957 |
| 60 | H | -3.7550 | -3.8155 | -2.0336 |
| 61 | C | -3.2290 | -2.7022 | 0.3469  |
| 62 | H | -4.2931 | -2.5168 | 0.1374  |
| 63 | H | -2.9106 | -2.0163 | 1.1411  |
| 64 | H | -3.1490 | -3.7327 | 0.7193  |
| 65 | C | -3.0943 | 1.9719  | 0.4786  |
| 66 | H | -3.7077 | 2.6842  | -0.0927 |
| 67 | C | -3.9343 | 0.7429  | 0.8161  |
| 68 | H | -3.3787 | 0.0892  | 1.4971  |
| 69 | H | -4.2149 | 0.1578  | -0.0680 |
| 70 | H | -4.8628 | 1.0628  | 1.3149  |
| 71 | C | -2.6495 | 2.6682  | 1.7650  |
| 72 | H | -3.5185 | 2.7960  | 2.4280  |
| 73 | H | -2.2293 | 3.6631  | 1.5823  |
| 74 | H | -1.9060 | 2.0685  | 2.3077  |
| 75 | C | -1.0267 | 3.2516  | -1.1704 |
| 76 | H | -0.3785 | 2.9810  | -2.0114 |
| 77 | C | -2.1158 | 4.1728  | -1.7047 |
| 78 | H | -2.7846 | 4.5236  | -0.9058 |
| 79 | H | -2.7266 | 3.6813  | -2.4747 |

|     |   |         |         |         |
|-----|---|---------|---------|---------|
| 80  | H | -1.6583 | 5.0636  | -2.1626 |
| 81  | C | -0.1470 | 3.9455  | -0.1294 |
| 82  | H | 0.5626  | 4.6227  | -0.6273 |
| 83  | H | 0.4340  | 3.2281  | 0.4661  |
| 84  | H | -0.7381 | 4.5518  | 0.5689  |
| 85  | C | 2.9963  | 1.9863  | -0.1274 |
| 86  | H | 2.4341  | 2.9035  | -0.3573 |
| 87  | C | 4.4474  | 2.2073  | -0.5611 |
| 88  | H | 4.8086  | 3.1492  | -0.1208 |
| 89  | H | 4.5888  | 2.2764  | -1.6448 |
| 90  | H | 5.1050  | 1.4101  | -0.1950 |
| 91  | C | 2.9340  | 1.7886  | 1.3869  |
| 92  | H | 3.4888  | 0.8929  | 1.6991  |
| 93  | H | 1.9052  | 1.6743  | 1.7474  |
| 94  | H | 3.3921  | 2.6545  | 1.8886  |
| 95  | C | 3.1300  | -0.7073 | -1.5148 |
| 96  | H | 2.4212  | -1.5049 | -1.7745 |
| 97  | C | 3.9980  | -0.4505 | -2.7407 |
| 98  | H | 4.7628  | 0.3147  | -2.5572 |
| 99  | H | 3.3988  | -0.1351 | -3.6042 |
| 100 | H | 4.5188  | -1.3797 | -3.0193 |
| 101 | C | 3.9512  | -1.1926 | -0.3210 |
| 102 | H | 4.3369  | -2.2025 | -0.5233 |
| 103 | H | 3.3602  | -1.2438 | 0.6018  |
| 104 | H | 4.8141  | -0.5439 | -0.1302 |
| 105 | C | -0.7568 | -0.3515 | 1.8161  |
| 106 | O | -1.6729 | -0.6302 | 2.5815  |
| 107 | O | 0.4819  | -0.1555 | 2.0645  |

/db/nbandeira/Fe(NPiso)/BIH/1e-/BIH+

Energy (POTENTIAL) = -689.36539451065141 Eh

| Atom | X       | Y       | Z       |
|------|---------|---------|---------|
| 1 C  | 1.4108  | -3.1221 | -1.5490 |
| 2 C  | 2.7273  | -3.5394 | -1.4629 |
| 3 C  | 1.0753  | -1.9182 | -0.9073 |
| 4 H  | 3.0247  | -4.4678 | -1.9489 |
| 5 C  | 3.7063  | -2.7902 | -0.7574 |
| 6 C  | 2.0614  | -1.1691 | -0.1818 |
| 7 H  | 4.7299  | -3.1611 | -0.7245 |
| 8 C  | 3.3946  | -1.6054 | -0.1136 |
| 9 H  | 4.1490  | -1.0342 | 0.4230  |
| 10 H | 0.6656  | -3.7020 | -2.0891 |
| 11 N | -0.0901 | -1.2575 | -0.8248 |
| 12 N | 1.4583  | -0.0929 | 0.3489  |
| 13 C | 2.0754  | 0.9723  | 1.0967  |
| 14 H | 2.9426  | 0.5858  | 1.6414  |
| 15 H | 2.3973  | 1.7822  | 0.4264  |
| 16 H | 1.3536  | 1.3701  | 1.8190  |
| 17 C | -1.3649 | -1.6534 | -1.3659 |
| 18 H | -1.9081 | -0.7629 | -1.7030 |
| 19 H | -1.2091 | -2.3173 | -2.2215 |
| 20 H | -1.9658 | -2.1733 | -0.6063 |
| 21 C | 0.0553  | -0.0552 | -0.0234 |
| 22 H | -0.1360 | 0.8290  | -0.6590 |
| 23 C | -0.8771 | -0.0220 | 1.1700  |
| 24 C | -1.8213 | 0.9979  | 1.2911  |
| 25 C | -0.7942 | -1.0232 | 2.1446  |
| 26 C | -2.6863 | 1.0203  | 2.3876  |
| 27 C | -1.6575 | -0.9990 | 3.2372  |
| 28 C | -2.6044 | 0.0231  | 3.3593  |
| 29 H | -1.8805 | 1.7749  | 0.5282  |
| 30 H | -0.0555 | -1.8207 | 2.0518  |
| 31 H | -3.4225 | 1.8185  | 2.4803  |
| 32 H | -1.5926 | -1.7780 | 3.9967  |
| 33 H | -3.2787 | 0.0402  | 4.2157  |

/db/nbandeira/Fe(NPiso)/BIH/1e-/BI+

Energy (POTENTIAL) = -688.74255152645094 Eh

| Atom | X       | Y       | Z       |
|------|---------|---------|---------|
| 1 C  | 1.4422  | -2.8840 | -2.0484 |
| 2 C  | 2.7902  | -3.0368 | -2.3542 |
| 3 C  | 1.1383  | -2.0502 | -0.9717 |
| 4 H  | 3.0759  | -3.6775 | -3.1875 |
| 5 C  | 3.7961  | -2.3826 | -1.6151 |
| 6 C  | 2.1385  | -1.4003 | -0.2364 |
| 7 H  | 4.8393  | -2.5323 | -1.8908 |
| 8 C  | 3.4915  | -1.5520 | -0.5422 |
| 9 H  | 4.2688  | -1.0501 | 0.0307  |
| 10 H | 0.6654  | -3.3856 | -2.6222 |
| 11 N | -0.0695 | -1.6877 | -0.4031 |
| 12 N | 1.4947  | -0.6604 | 0.7393  |
| 13 C | 2.1683  | 0.2096  | 1.6843  |
| 14 H | 2.6273  | -0.3839 | 2.4836  |
| 15 H | 2.9427  | 0.7736  | 1.1540  |
| 16 H | 1.4471  | 0.9095  | 2.1134  |
| 17 C | -1.3601 | -2.1920 | -0.8320 |
| 18 H | -2.0956 | -2.0308 | -0.0400 |
| 19 H | -1.6824 | -1.6786 | -1.7454 |
| 20 H | -1.2721 | -3.2662 | -1.0253 |
| 21 C | 0.1707  | -0.8514 | 0.6200  |
| 22 C | -0.8515 | -0.2423 | 1.4716  |
| 23 C | -1.8852 | 0.5100  | 0.8944  |
| 24 C | -0.7954 | -0.4131 | 2.8627  |
| 25 C | -2.8551 | 1.0889  | 1.7092  |
| 26 C | -1.7728 | 0.1653  | 3.6690  |
| 27 C | -2.8006 | 0.9161  | 3.0940  |
| 28 H | -1.9184 | 0.6551  | -0.1851 |
| 29 H | -0.0006 | -1.0103 | 3.3087  |
| 30 H | -3.6535 | 1.6792  | 1.2609  |
| 31 H | -1.7330 | 0.0255  | 4.7487  |
| 32 H | -3.5627 | 1.3687  | 3.7282  |

/db/nbandeira/Fe(NPiso)/L=Cl/2e-/1-Cl+NCMe

Energy (POTENTIAL) = -4466.93422870 Eh

| Atom | X       | Y       | Z       |
|------|---------|---------|---------|
| 1 Fe | -0.0297 | -0.1152 | 0.0354  |
| 2 P  | -0.7673 | -2.2263 | -0.7603 |
| 3 P  | -1.6281 | 1.4896  | -0.5325 |
| 4 P  | 2.0227  | 0.5765  | -1.0248 |
| 5 Cl | 0.1428  | -0.3075 | 2.4323  |
| 6 N  | -0.3465 | -0.0256 | -2.8216 |
| 7 C  | 0.2502  | -1.2615 | -3.1891 |
| 8 C  | 1.0525  | -1.3371 | -4.3336 |
| 9 H  | 1.2162  | -0.4308 | -4.9151 |
| 10 C | 1.6115  | -2.5476 | -4.7334 |
| 11 H | 2.2400  | -2.5828 | -5.6252 |
| 12 C | 1.3605  | -3.7228 | -4.0126 |
| 13 C | 0.5627  | -3.6306 | -2.8686 |
| 14 H | 0.3698  | -4.5445 | -2.3069 |
| 15 C | 0.0298  | -2.4139 | -2.4140 |
| 16 C | 1.9566  | -5.0358 | -4.4398 |
| 17 H | 1.8841  | -5.1754 | -5.5277 |
| 18 H | 1.4536  | -5.8811 | -3.9521 |
| 19 H | 3.0249  | -5.0923 | -4.1791 |
| 20 C | -1.7573 | 0.0604  | -2.9374 |
| 21 C | -2.4137 | -0.6150 | -3.9708 |
| 22 H | -1.8294 | -1.2082 | -4.6727 |
| 23 C | -3.8059 | -0.5387 | -4.0993 |
| 24 H | -4.3039 | -1.0884 | -4.8999 |
| 25 C | -4.5592 | 0.2415  | -3.2249 |
| 26 C | -3.8813 | 0.9356  | -2.2040 |
| 27 H | -4.4757 | 1.5378  | -1.5171 |
| 28 C | -2.4966 | 0.8436  | -2.0252 |
| 29 C | -6.0552 | 0.3394  | -3.3401 |
| 30 H | -6.3813 | 1.3831  | -3.4630 |
| 31 H | -6.5522 | -0.0450 | -2.4364 |
| 32 H | -6.4288 | -0.2342 | -4.1983 |
| 33 C | 0.3587  | 1.1523  | -3.2053 |
| 34 C | -0.1564 | 1.9811  | -4.1899 |
| 35 H | -1.0999 | 1.7070  | -4.6627 |
| 36 C | 0.5112  | 3.1689  | -4.5755 |
| 37 H | 0.0839  | 3.8245  | -5.3351 |
| 38 C | 1.7668  | 3.4673  | -3.9812 |

|    |   |         |         |         |
|----|---|---------|---------|---------|
| 39 | C | 2.2898  | 2.6140  | -3.0245 |
| 40 | H | 3.2527  | 2.8778  | -2.5926 |
| 41 | C | 1.6041  | 1.4335  | -2.5601 |
| 42 | C | 2.5171  | 4.7024  | -4.4018 |
| 43 | H | 3.4503  | 4.8229  | -3.8346 |
| 44 | H | 1.9112  | 5.6106  | -4.2512 |
| 45 | H | 2.7744  | 4.6762  | -5.4734 |
| 46 | C | -0.1396 | -3.7396 | 0.1621  |
| 47 | H | -0.4529 | -4.6384 | -0.3915 |
| 48 | C | 1.3832  | -3.7019 | 0.2631  |
| 49 | H | 1.6916  | -2.8621 | 0.8992  |
| 50 | H | 1.8849  | -3.5890 | -0.7053 |
| 51 | H | 1.7503  | -4.6286 | 0.7305  |
| 52 | C | -0.7058 | -3.8120 | 1.5830  |
| 53 | H | -0.1910 | -4.6132 | 2.1361  |
| 54 | H | -1.7761 | -4.0314 | 1.6151  |
| 55 | H | -0.5313 | -2.8667 | 2.1165  |
| 56 | C | -2.5666 | -2.6533 | -1.1717 |
| 57 | H | -2.9220 | -1.7124 | -1.6118 |
| 58 | C | -2.7242 | -3.7522 | -2.2164 |
| 59 | H | -2.2995 | -4.7067 | -1.8697 |
| 60 | H | -2.2420 | -3.4907 | -3.1660 |
| 61 | H | -3.7939 | -3.9226 | -2.4182 |
| 62 | C | -3.4445 | -2.9552 | 0.0416  |
| 63 | H | -4.5006 | -2.7984 | -0.2266 |
| 64 | H | -3.2259 | -2.3210 | 0.9077  |
| 65 | H | -3.3459 | -4.0033 | 0.3552  |
| 66 | C | -3.0292 | 1.7585  | 0.6806  |
| 67 | H | -3.8149 | 2.3570  | 0.1960  |
| 68 | C | -3.6037 | 0.4078  | 1.0914  |
| 69 | H | -2.8265 | -0.2032 | 1.5700  |
| 70 | H | -3.9942 | -0.1545 | 0.2341  |
| 71 | H | -4.4255 | 0.5417  | 1.8124  |
| 72 | C | -2.5412 | 2.5202  | 1.9130  |
| 73 | H | -3.3128 | 2.4866  | 2.6977  |
| 74 | H | -2.3394 | 3.5758  | 1.6986  |
| 75 | H | -1.6272 | 2.0679  | 2.3240  |
| 76 | C | -1.1292 | 3.2175  | -1.0683 |
| 77 | H | -0.5314 | 2.9879  | -1.9604 |
| 78 | C | -2.2857 | 4.1127  | -1.4937 |
| 79 | H | -2.9193 | 4.4005  | -0.6414 |

|     |   |         |         |         |
|-----|---|---------|---------|---------|
| 80  | H | -2.9237 | 3.6208  | -2.2412 |
| 81  | H | -1.9004 | 5.0410  | -1.9450 |
| 82  | C | -0.2002 | 3.9020  | -0.0677 |
| 83  | H | 0.3857  | 4.6837  | -0.5753 |
| 84  | H | 0.5091  | 3.1904  | 0.3762  |
| 85  | H | -0.7484 | 4.3851  | 0.7512  |
| 86  | C | 3.0568  | 1.8597  | -0.0939 |
| 87  | H | 2.5263  | 2.7903  | -0.3486 |
| 88  | C | 4.5244  | 2.0500  | -0.4818 |
| 89  | H | 4.9152  | 2.9542  | 0.0124  |
| 90  | H | 4.6864  | 2.1685  | -1.5585 |
| 91  | H | 5.1448  | 1.2091  | -0.1473 |
| 92  | C | 2.9543  | 1.6659  | 1.4178  |
| 93  | H | 3.4971  | 0.7661  | 1.7426  |
| 94  | H | 1.9163  | 1.5472  | 1.7519  |
| 95  | H | 3.4008  | 2.5272  | 1.9411  |
| 96  | C | 3.2175  | -0.8233 | -1.4747 |
| 97  | H | 2.5054  | -1.5893 | -1.8153 |
| 98  | C | 4.1673  | -0.5544 | -2.6344 |
| 99  | H | 4.9832  | 0.1256  | -2.3576 |
| 100 | H | 3.6274  | -0.1141 | -3.4837 |
| 101 | H | 4.6246  | -1.4968 | -2.9775 |
| 102 | C | 3.9339  | -1.3797 | -0.2474 |
| 103 | H | 4.3292  | -2.3864 | -0.4545 |
| 104 | H | 3.2619  | -1.4614 | 0.6174  |
| 105 | H | 4.7831  | -0.7520 | 0.0528  |
| 106 | C | -3.1757 | -1.4339 | 4.2608  |
| 107 | N | -3.6650 | -2.3866 | 3.8181  |
| 108 | C | -2.5477 | -0.2403 | 4.7931  |
| 109 | H | -1.6015 | -0.0702 | 4.2552  |
| 110 | H | -2.3480 | -0.3612 | 5.8656  |
| 111 | H | -3.2035 | 0.6274  | 4.6450  |

/db/nbandeira/Fe(NPiso)/L=Cl/0e-/1-NCMe+Cl-

Energy (POTENTIAL) = -4466.76716424 Eh

| Atom | X       | Y       | Z       |
|------|---------|---------|---------|
| 1 Fe | -0.2984 | 1.4266  | 2.6661  |
| 2 P  | -1.0737 | -0.7925 | 1.9417  |
| 3 P  | -1.9415 | 3.1656  | 2.1502  |
| 4 P  | 1.8928  | 2.1387  | 1.8075  |
| 5 N  | -0.4968 | 1.5303  | 0.0354  |
| 6 C  | 0.0823  | 0.2844  | -0.3848 |
| 7 C  | 0.8733  | 0.2247  | -1.5343 |
| 8 H  | 1.0608  | 1.1312  | -2.1067 |
| 9 C  | 1.4226  | -0.9819 | -1.9549 |
| 10 H | 2.0416  | -1.0013 | -2.8525 |
| 11 C | 1.1773  | -2.1675 | -1.2546 |
| 12 C | 0.3736  | -2.0949 | -0.1126 |
| 13 H | 0.1807  | -3.0167 | 0.4346  |
| 14 C | -0.1647 | -0.8899 | 0.3509  |
| 15 C | 1.7771  | -3.4734 | -1.6892 |
| 16 H | 1.9686  | -3.4852 | -2.7697 |
| 17 H | 1.1202  | -4.3172 | -1.4415 |
| 18 H | 2.7389  | -3.6474 | -1.1826 |
| 19 C | -1.9126 | 1.6393  | -0.1944 |
| 20 C | -2.5073 | 0.9721  | -1.2676 |
| 21 H | -1.8976 | 0.3462  | -1.9169 |
| 22 C | -3.8706 | 1.0969  | -1.5079 |
| 23 H | -4.3159 | 0.5567  | -2.3441 |
| 24 C | -4.6729 | 1.9137  | -0.7019 |
| 25 C | -4.0617 | 2.5846  | 0.3618  |
| 26 H | -4.6861 | 3.2100  | 0.9988  |
| 27 C | -2.6972 | 2.4507  | 0.6443  |
| 28 C | -6.1437 | 2.0544  | -0.9683 |
| 29 H | -6.3252 | 2.4530  | -1.9768 |
| 30 H | -6.6191 | 2.7281  | -0.2449 |
| 31 H | -6.6493 | 1.0798  | -0.9109 |
| 32 C | 0.2371  | 2.6993  | -0.3713 |
| 33 C | -0.2152 | 3.4769  | -1.4414 |
| 34 H | -1.1167 | 3.1840  | -1.9762 |
| 35 C | 0.4602  | 4.6330  | -1.8135 |
| 36 H | 0.0792  | 5.2288  | -2.6436 |
| 37 C | 1.6152  | 5.0403  | -1.1354 |
| 38 C | 2.0664  | 4.2428  | -0.0805 |

|    |   |         |         |         |
|----|---|---------|---------|---------|
| 39 | H | 2.9552  | 4.5670  | 0.4544  |
| 40 | C | 1.4003  | 3.0780  | 0.3196  |
| 41 | C | 2.3486  | 6.2885  | -1.5328 |
| 42 | H | 3.1212  | 6.5491  | -0.7989 |
| 43 | H | 1.6608  | 7.1400  | -1.6276 |
| 44 | H | 2.8402  | 6.1593  | -2.5086 |
| 45 | C | -0.4071 | -2.2322 | 2.9197  |
| 46 | H | -0.5531 | -3.1361 | 2.3107  |
| 47 | C | 1.0850  | -2.0099 | 3.1530  |
| 48 | H | 1.2482  | -1.1262 | 3.7863  |
| 49 | H | 1.6509  | -1.8797 | 2.2231  |
| 50 | H | 1.5071  | -2.8765 | 3.6819  |
| 51 | C | -1.1200 | -2.4344 | 4.2567  |
| 52 | H | -0.5158 | -3.1141 | 4.8752  |
| 53 | H | -2.1067 | -2.8916 | 4.1422  |
| 54 | H | -1.2561 | -1.5033 | 4.8228  |
| 55 | C | -2.8636 | -1.1142 | 1.4948  |
| 56 | H | -3.1798 | -0.1463 | 1.0841  |
| 57 | C | -3.0092 | -2.1747 | 0.4089  |
| 58 | H | -2.6182 | -3.1478 | 0.7405  |
| 59 | H | -2.4964 | -1.8955 | -0.5197 |
| 60 | H | -4.0765 | -2.3065 | 0.1763  |
| 61 | C | -3.7587 | -1.4325 | 2.6933  |
| 62 | H | -4.7995 | -1.2070 | 2.4199  |
| 63 | H | -3.5217 | -0.8662 | 3.6026  |
| 64 | H | -3.7139 | -2.5002 | 2.9424  |
| 65 | C | -3.3571 | 3.3804  | 3.3320  |
| 66 | H | -4.1053 | 4.0038  | 2.8211  |
| 67 | C | -3.9719 | 2.0260  | 3.6691  |
| 68 | H | -3.3091 | 1.4280  | 4.3098  |
| 69 | H | -4.2243 | 1.4389  | 2.7779  |
| 70 | H | -4.8998 | 2.1811  | 4.2390  |
| 71 | C | -2.9179 | 4.1068  | 4.6036  |
| 72 | H | -3.7275 | 4.0472  | 5.3453  |
| 73 | H | -2.7119 | 5.1685  | 4.4294  |
| 74 | H | -2.0247 | 3.6489  | 5.0515  |
| 75 | C | -1.3550 | 4.8630  | 1.6483  |
| 76 | H | -0.7170 | 4.6421  | 0.7837  |
| 77 | C | -2.4876 | 5.7682  | 1.1790  |
| 78 | H | -3.1669 | 6.0343  | 2.0009  |
| 79 | H | -3.0773 | 5.3044  | 0.3766  |

|     |    |         |         |         |
|-----|----|---------|---------|---------|
| 80  | H  | -2.0644 | 6.7033  | 0.7833  |
| 81  | C  | -0.4780 | 5.5215  | 2.7117  |
| 82  | H  | 0.1151  | 6.3215  | 2.2463  |
| 83  | H  | 0.2201  | 4.8132  | 3.1760  |
| 84  | H  | -1.0733 | 5.9753  | 3.5126  |
| 85  | C  | 2.8446  | 3.3644  | 2.8530  |
| 86  | H  | 2.2943  | 4.2991  | 2.6673  |
| 87  | C  | 4.3130  | 3.5995  | 2.4987  |
| 88  | H  | 4.6764  | 4.4562  | 3.0848  |
| 89  | H  | 4.4850  | 3.8295  | 1.4418  |
| 90  | H  | 4.9394  | 2.7387  | 2.7596  |
| 91  | C  | 2.6935  | 3.0281  | 4.3367  |
| 92  | H  | 3.1118  | 2.0422  | 4.5807  |
| 93  | H  | 1.6438  | 3.0432  | 4.6509  |
| 94  | H  | 3.2336  | 3.7767  | 4.9343  |
| 95  | C  | 3.0244  | 0.7667  | 1.2269  |
| 96  | H  | 2.3109  | 0.0207  | 0.8502  |
| 97  | C  | 3.9448  | 1.1471  | 0.0734  |
| 98  | H  | 4.7072  | 1.8766  | 0.3724  |
| 99  | H  | 3.3857  | 1.5611  | -0.7753 |
| 100 | H  | 4.4655  | 0.2444  | -0.2793 |
| 101 | C  | 3.7752  | 0.1352  | 2.3985  |
| 102 | H  | 4.1925  | -0.8303 | 2.0789  |
| 103 | H  | 3.1252  | -0.0541 | 3.2616  |
| 104 | H  | 4.6113  | 0.7589  | 2.7361  |
| 105 | C  | -0.2570 | 1.1948  | 5.8444  |
| 106 | N  | -0.2555 | 1.3198  | 4.6953  |
| 107 | C  | -0.2874 | 1.0189  | 7.2709  |
| 108 | H  | -0.1761 | 1.9891  | 7.7725  |
| 109 | H  | 0.5235  | 0.3461  | 7.5798  |
| 110 | H  | -1.2739 | 0.5668  | 7.4978  |
| 111 | Cl | -3.3017 | -0.3107 | 6.5957  |

/db/nbandeira/Fe(NPiso)/\_Ir(ppy)2(dtb-bpy)\_+/1e-/Ir(ppy)2(dtb-bpy)+\_+1e-

Energy (POTENTIAL) = -19596.40354413244495 Eh

| Atom | X       | Y       | Z       |
|------|---------|---------|---------|
| 1 C  | -1.5349 | 2.7711  | -0.1379 |
| 2 H  | -0.5251 | 3.1925  | -0.1587 |
| 3 C  | -2.6427 | 3.5910  | -0.2180 |
| 4 C  | -3.9458 | 3.0064  | -0.1821 |
| 5 C  | -4.0127 | 1.6350  | -0.0765 |
| 6 H  | -4.9809 | 1.1357  | -0.0485 |
| 7 C  | -2.8407 | 0.8285  | -0.0013 |
| 8 C  | -2.8498 | -0.5905 | 0.1078  |
| 9 C  | -4.0247 | -1.3884 | 0.1607  |
| 10 H | -4.9932 | -0.8870 | 0.1097  |
| 11 C | -3.9719 | -2.7635 | 0.2765  |
| 12 C | -2.6814 | -3.3571 | 0.3437  |
| 13 C | -1.5638 | -2.5426 | 0.2812  |
| 14 H | -0.5586 | -2.9730 | 0.3252  |
| 15 C | 1.4751  | 1.4828  | -0.1173 |
| 16 C | 2.1805  | 2.1706  | 0.8848  |
| 17 H | 1.9713  | 1.9569  | 1.9382  |
| 18 C | 3.1455  | 3.1278  | 0.5703  |
| 19 H | 3.6768  | 3.6485  | 1.3746  |
| 20 C | 3.4423  | 3.4291  | -0.7643 |
| 21 H | 4.1991  | 4.1808  | -1.0076 |
| 22 C | 2.7670  | 2.7626  | -1.7813 |
| 23 H | 3.0004  | 2.9979  | -2.8242 |
| 24 C | 1.7972  | 1.8003  | -1.4632 |
| 25 C | 1.0401  | 1.0521  | -2.4632 |
| 26 C | 1.1729  | 1.1749  | -3.8510 |
| 27 H | 1.8938  | 1.8830  | -4.2629 |
| 28 C | 0.3915  | 0.3984  | -4.6950 |
| 29 H | 0.4935  | 0.4908  | -5.7799 |
| 30 C | -0.5231 | -0.4974 | -4.1388 |
| 31 H | -1.1613 | -1.1288 | -4.7607 |
| 32 C | -0.6135 | -0.5776 | -2.7578 |
| 33 H | -1.3086 | -1.2610 | -2.2669 |
| 34 C | 1.4567  | -1.2872 | 0.3246  |
| 35 C | 2.1811  | -1.9813 | -0.6595 |
| 36 H | 2.0009  | -1.7653 | -1.7178 |
| 37 C | 3.1290  | -2.9473 | -0.3210 |
| 38 H | 3.6760  | -3.4727 | -1.1116 |

|    |    |         |         |         |
|----|----|---------|---------|---------|
| 39 | C  | 3.3887  | -3.2518 | 1.0206  |
| 40 | H  | 4.1320  | -4.0106 | 1.2828  |
| 41 | C  | 2.6937  | -2.5796 | 2.0205  |
| 42 | H  | 2.8982  | -2.8176 | 3.0688  |
| 43 | C  | 1.7412  | -1.6083 | 1.6781  |
| 44 | C  | 0.9657  | -0.8534 | 2.6590  |
| 45 | C  | 1.0610  | -0.9788 | 4.0496  |
| 46 | H  | 1.7637  | -1.6946 | 4.4793  |
| 47 | C  | 0.2656  | -0.1951 | 4.8739  |
| 48 | H  | 0.3385  | -0.2896 | 5.9610  |
| 49 | C  | -0.6251 | 0.7102  | 4.2952  |
| 50 | H  | -1.2729 | 1.3474  | 4.9010  |
| 51 | C  | -0.6790 | 0.7924  | 2.9124  |
| 52 | H  | -1.3543 | 1.4827  | 2.4040  |
| 53 | Ir | 0.0355  | 0.1049  | 0.0859  |
| 54 | N  | -1.6004 | 1.4387  | -0.0247 |
| 55 | N  | -1.6160 | -1.2134 | 0.1599  |
| 56 | N  | 0.1442  | 0.1698  | -1.9430 |
| 57 | N  | 0.0923  | 0.0381  | 2.1168  |
| 58 | H  | -2.4984 | 4.6696  | -0.3045 |
| 59 | H  | -2.5413 | -4.4333 | 0.4403  |
| 60 | C  | -5.1797 | 3.8997  | -0.2545 |
| 61 | C  | -5.2620 | -3.5844 | 0.3262  |
| 62 | C  | -4.9839 | -5.0829 | 0.4680  |
| 63 | H  | -5.9398 | -5.6343 | 0.4988  |
| 64 | H  | -4.3990 | -5.4727 | -0.3830 |
| 65 | H  | -4.4344 | -5.3112 | 1.3978  |
| 66 | C  | -6.0540 | -3.3585 | -0.9712 |
| 67 | H  | -5.4658 | -3.6757 | -1.8507 |
| 68 | H  | -6.9905 | -3.9452 | -0.9549 |
| 69 | H  | -6.3214 | -2.2963 | -1.1046 |
| 70 | C  | -5.1402 | 4.7102  | -1.5602 |
| 71 | H  | -4.2376 | 5.3417  | -1.6228 |
| 72 | H  | -5.1509 | 4.0402  | -2.4383 |
| 73 | H  | -6.0219 | 5.3733  | -1.6227 |
| 74 | C  | -6.4813 | 3.0970  | -0.2209 |
| 75 | H  | -7.3429 | 3.7853  | -0.2739 |
| 76 | H  | -6.5537 | 2.4015  | -1.0750 |
| 77 | H  | -6.5760 | 2.5118  | 0.7102  |
| 78 | C  | -5.1687 | 4.8623  | 0.9438  |
| 79 | H  | -6.0478 | 5.5308  | 0.9046  |

|    |   |         |         |        |
|----|---|---------|---------|--------|
| 80 | H | -5.2043 | 4.3032  | 1.8958 |
| 81 | H | -4.2640 | 5.4943  | 0.9525 |
| 82 | C | -6.1077 | -3.1319 | 1.5267 |
| 83 | H | -6.3806 | -2.0653 | 1.4538 |
| 84 | H | -7.0429 | -3.7186 | 1.5768 |
| 85 | H | -5.5579 | -3.2805 | 2.4731 |

/db/nbandeira/Fe(NPiso)/1\_with\_vacancy  
Energy (POTENTIAL) = -3872.67903567 Eh

| Atom | X       | Y       | Z       |
|------|---------|---------|---------|
| 1 Fe | -0.0383 | -0.0283 | 0.3739  |
| 2 P  | 2.3320  | -0.1137 | 0.6684  |
| 3 P  | -1.2421 | -2.1052 | 0.7160  |
| 4 P  | -1.2567 | 2.0011  | 0.8046  |
| 5 N  | -0.0140 | -0.0887 | 2.6201  |
| 6 C  | 2.2075  | 0.9119  | 2.1832  |
| 7 C  | 1.0384  | 0.8493  | 2.9677  |
| 8 C  | 0.9017  | 1.6835  | 4.0758  |
| 9 H  | 0.0011  | 1.6354  | 4.6849  |
| 10 C | 1.9080  | 2.5881  | 4.4020  |
| 11 H | 1.7771  | 3.2382  | 5.2673  |
| 12 C | 3.0827  | 2.6687  | 3.6464  |
| 13 C | 3.2133  | 1.8108  | 2.5487  |
| 14 H | 4.1281  | 1.8599  | 1.9578  |
| 15 C | 4.1615  | 3.6585  | 3.9753  |
| 16 H | 4.1110  | 4.5239  | 3.2973  |
| 17 H | 5.1591  | 3.2141  | 3.8614  |
| 18 H | 4.0610  | 4.0330  | 5.0014  |
| 19 C | 3.2441  | -1.6544 | 1.2208  |
| 20 H | 2.4508  | -2.2615 | 1.6785  |
| 21 C | 3.8483  | -2.4511 | 0.0676  |
| 22 H | 3.1469  | -2.6176 | -0.7575 |
| 23 H | 4.1533  | -3.4355 | 0.4501  |
| 24 H | 4.7468  | -1.9604 | -0.3293 |
| 25 C | 4.2999  | -1.3446 | 2.2771  |
| 26 H | 5.0662  | -0.6564 | 1.8920  |
| 27 H | 4.8029  | -2.2808 | 2.5601  |
| 28 H | 3.8688  | -0.9084 | 3.1859  |
| 29 C | 3.3673  | 0.8488  | -0.5353 |
| 30 H | 4.3940  | 0.8903  | -0.1405 |
| 31 C | 2.8008  | 2.2581  | -0.6885 |
| 32 H | 1.7858  | 2.2160  | -1.1096 |
| 33 H | 3.4250  | 2.8254  | -1.3934 |
| 34 H | 2.7574  | 2.8205  | 0.2508  |
| 35 C | 3.3662  | 0.1644  | -1.9054 |
| 36 H | 3.8698  | -0.8059 | -1.9113 |
| 37 H | 3.8883  | 0.8125  | -2.6237 |
| 38 H | 2.3388  | 0.0212  | -2.2727 |

|    |   |         |         |         |
|----|---|---------|---------|---------|
| 39 | C | -0.2455 | -2.5148 | 2.1944  |
| 40 | C | 0.2961  | -1.4660 | 2.9607  |
| 41 | C | 1.1182  | -1.7555 | 4.0487  |
| 42 | H | 1.5330  | -0.9452 | 4.6455  |
| 43 | C | 1.4160  | -3.0755 | 4.3710  |
| 44 | H | 2.0655  | -3.2802 | 5.2224  |
| 45 | C | 0.8922  | -4.1395 | 3.6268  |
| 46 | C | 0.0588  | -3.8341 | 2.5457  |
| 47 | H | -0.3468 | -4.6566 | 1.9568  |
| 48 | C | 1.2331  | -5.5609 | 3.9658  |
| 49 | H | 2.2705  | -5.7897 | 3.6796  |
| 50 | H | 0.5769  | -6.2664 | 3.4418  |
| 51 | H | 1.1473  | -5.7417 | 5.0458  |
| 52 | C | -0.9559 | -3.4654 | -0.5048 |
| 53 | H | -1.2690 | -4.4051 | -0.0264 |
| 54 | C | -1.8016 | -3.2383 | -1.7574 |
| 55 | H | -2.8755 | -3.3435 | -1.5658 |
| 56 | H | -1.5271 | -3.9873 | -2.5135 |
| 57 | H | -1.6209 | -2.2433 | -2.1910 |
| 58 | C | 0.5277  | -3.5395 | -0.8494 |
| 59 | H | 0.8671  | -2.6138 | -1.3379 |
| 60 | H | 0.6996  | -4.3674 | -1.5519 |
| 61 | H | 1.1543  | -3.7143 | 0.0335  |
| 62 | C | -3.0090 | -2.1453 | 1.3017  |
| 63 | H | -2.9567 | -1.5642 | 2.2327  |
| 64 | C | -3.9744 | -1.4326 | 0.3600  |
| 65 | H | -3.6294 | -0.4230 | 0.1091  |
| 66 | H | -4.9495 | -1.3370 | 0.8582  |
| 67 | H | -4.1321 | -1.9846 | -0.5744 |
| 68 | C | -3.4619 | -3.5605 | 1.6462  |
| 69 | H | -3.5542 | -4.1899 | 0.7504  |
| 70 | H | -4.4532 | -3.5126 | 2.1199  |
| 71 | H | -2.7812 | -4.0550 | 2.3520  |
| 72 | C | -2.0439 | 1.2947  | 2.2990  |
| 73 | C | -1.3428 | 0.3242  | 3.0391  |
| 74 | C | -1.9389 | -0.2590 | 4.1571  |
| 75 | H | -1.3984 | -1.0089 | 4.7317  |
| 76 | C | -3.2331 | 0.0904  | 4.5277  |
| 77 | H | -3.6837 | -0.3888 | 5.3972  |
| 78 | C | -3.9644 | 1.0335  | 3.7964  |
| 79 | C | -3.3448 | 1.6260  | 2.6921  |

|     |   |         |        |         |
|-----|---|---------|--------|---------|
| 80  | H | -3.9120 | 2.3552 | 2.1177  |
| 81  | C | 0.0645  | 4.4194 | 0.1833  |
| 82  | H | 0.4942  | 3.8539 | -0.6508 |
| 83  | H | 0.8255  | 5.1349 | 0.5254  |
| 84  | H | -0.7831 | 4.9994 | -0.1992 |
| 85  | C | -2.6149 | 2.4135 | -0.3995 |
| 86  | H | -3.3219 | 1.5846 | -0.2444 |
| 87  | C | -3.3631 | 3.7294 | -0.1931 |
| 88  | H | -3.7602 | 3.8550 | 0.8202  |
| 89  | H | -4.2161 | 3.7566 | -0.8864 |
| 90  | H | -2.7331 | 4.5977 | -0.4166 |
| 91  | C | -2.0723 | 2.2984 | -1.8259 |
| 92  | H | -1.3077 | 3.0579 | -2.0370 |
| 93  | H | -2.8955 | 2.4469 | -2.5393 |
| 94  | H | -1.6370 | 1.3076 | -2.0195 |
| 95  | C | -0.3317 | 3.5286 | 1.3594  |
| 96  | H | 0.5913  | 3.1067 | 1.7803  |
| 97  | C | -1.0459 | 4.3031 | 2.4616  |
| 98  | H | -1.9931 | 4.7355 | 2.1143  |
| 99  | H | -0.4001 | 5.1311 | 2.7894  |
| 100 | H | -1.2539 | 3.6760 | 3.3377  |
| 101 | C | -5.3612 | 1.4093 | 4.1960  |
| 102 | H | -5.3507 | 2.0330 | 5.1024  |
| 103 | H | -5.9621 | 0.5184 | 4.4224  |
| 104 | H | -5.8658 | 1.9766 | 3.4044  |

/db/nbandeira/Fe(NPiso)/L=Cl/0e-/1-Cl+NCMe

Energy (POTENTIAL) = -4466.79551675 Eh

| Atom | X       | Y       | Z       |
|------|---------|---------|---------|
| 1 Fe | 0.0152  | -0.1480 | 0.0423  |
| 2 P  | -0.8164 | -2.3365 | -0.7574 |
| 3 P  | -1.6608 | 1.5427  | -0.5172 |
| 4 P  | 2.1352  | 0.6044  | -1.0028 |
| 5 Cl | 0.0645  | -0.2370 | 2.3155  |
| 6 N  | -0.2985 | -0.0524 | -2.7111 |
| 7 C  | 0.2725  | -1.2972 | -3.1294 |
| 8 C  | 1.0265  | -1.3725 | -4.3036 |
| 9 H  | 1.1911  | -0.4734 | -4.8947 |
| 10 C | 1.5635  | -2.5844 | -4.7232 |
| 11 H | 2.1531  | -2.6172 | -5.6401 |
| 12 C | 1.3410  | -3.7609 | -3.9982 |
| 13 C | 0.5747  | -3.6728 | -2.8324 |
| 14 H | 0.3969  | -4.5862 | -2.2658 |
| 15 C | 0.0524  | -2.4600 | -2.3688 |
| 16 C | 1.9263  | -5.0707 | -4.4419 |
| 17 H | 1.9028  | -5.1683 | -5.5354 |
| 18 H | 1.3846  | -5.9193 | -4.0054 |
| 19 H | 2.9788  | -5.1538 | -4.1301 |
| 20 C | -1.7216 | 0.0384  | -2.8740 |
| 21 C | -2.3552 | -0.6340 | -3.9216 |
| 22 H | -1.7660 | -1.2492 | -4.5998 |
| 23 C | -3.7309 | -0.5332 | -4.0971 |
| 24 H | -4.2064 | -1.0805 | -4.9118 |
| 25 C | -4.5072 | 0.2665  | -3.2507 |
| 26 C | -3.8574 | 0.9414  | -2.2115 |
| 27 H | -4.4630 | 1.5499  | -1.5409 |
| 28 C | -2.4797 | 0.8307  | -1.9931 |
| 29 C | -5.9876 | 0.4082  | -3.4582 |
| 30 H | -6.2007 | 1.1265  | -4.2647 |
| 31 H | -6.4867 | 0.7714  | -2.5511 |
| 32 H | -6.4435 | -0.5482 | -3.7467 |
| 33 C | 0.4034  | 1.1248  | -3.1365 |
| 34 C | -0.0978 | 1.8927  | -4.1927 |
| 35 H | -1.0030 | 1.5723  | -4.7051 |
| 36 C | 0.5278  | 3.0729  | -4.5750 |
| 37 H | 0.1075  | 3.6599  | -5.3923 |
| 38 C | 1.6821  | 3.5162  | -3.9193 |

|    |   |         |         |         |
|----|---|---------|---------|---------|
| 39 | C | 2.1859  | 2.7271  | -2.8817 |
| 40 | H | 3.0733  | 3.0820  | -2.3647 |
| 41 | C | 1.5726  | 1.5359  | -2.4732 |
| 42 | C | 2.3625  | 4.7922  | -4.3237 |
| 43 | H | 3.1131  | 5.0975  | -3.5841 |
| 44 | H | 1.6380  | 5.6098  | -4.4390 |
| 45 | H | 2.8735  | 4.6733  | -5.2910 |
| 46 | C | -0.1318 | -3.7612 | 0.2336  |
| 47 | H | -0.3618 | -4.6889 | -0.3116 |
| 48 | C | 1.3811  | -3.5973 | 0.3659  |
| 49 | H | 1.6142  | -2.7082 | 0.9694  |
| 50 | H | 1.8981  | -3.5051 | -0.5963 |
| 51 | H | 1.7997  | -4.4687 | 0.8901  |
| 52 | C | -0.7442 | -3.8424 | 1.6338  |
| 53 | H | -0.1838 | -4.5867 | 2.2185  |
| 54 | H | -1.7923 | -4.1508 | 1.6323  |
| 55 | H | -0.6672 | -2.8796 | 2.1562  |
| 56 | C | -2.6084 | -2.7072 | -1.1752 |
| 57 | H | -2.9600 | -1.7506 | -1.5830 |
| 58 | C | -2.7505 | -3.7766 | -2.2525 |
| 59 | H | -2.3279 | -4.7384 | -1.9265 |
| 60 | H | -2.2652 | -3.4896 | -3.1932 |
| 61 | H | -3.8189 | -3.9367 | -2.4616 |
| 62 | C | -3.4736 | -3.0439 | 0.0379  |
| 63 | H | -4.5291 | -2.8999 | -0.2345 |
| 64 | H | -3.2677 | -2.4179 | 0.9133  |
| 65 | H | -3.3540 | -4.0946 | 0.3313  |
| 66 | C | -3.0363 | 1.7386  | 0.7197  |
| 67 | H | -3.8299 | 2.3302  | 0.2406  |
| 68 | C | -3.5844 | 0.3642  | 1.0901  |
| 69 | H | -2.8047 | -0.2513 | 1.5576  |
| 70 | H | -3.9740 | -0.1790 | 0.2205  |
| 71 | H | -4.4059 | 0.4736  | 1.8133  |
| 72 | C | -2.5631 | 2.4928  | 1.9624  |
| 73 | H | -3.3453 | 2.4381  | 2.7335  |
| 74 | H | -2.3790 | 3.5537  | 1.7601  |
| 75 | H | -1.6490 | 2.0511  | 2.3821  |
| 76 | C | -1.1428 | 3.2553  | -1.0483 |
| 77 | H | -0.5414 | 3.0474  | -1.9421 |
| 78 | C | -2.3111 | 4.1401  | -1.4659 |
| 79 | H | -2.9553 | 4.3992  | -0.6138 |

|     |   |         |         |         |
|-----|---|---------|---------|---------|
| 80  | H | -2.9314 | 3.6604  | -2.2353 |
| 81  | H | -1.9263 | 5.0807  | -1.8875 |
| 82  | C | -0.2263 | 3.9317  | -0.0297 |
| 83  | H | 0.3401  | 4.7338  | -0.5242 |
| 84  | H | 0.4972  | 3.2320  | 0.4093  |
| 85  | H | -0.7901 | 4.3858  | 0.7937  |
| 86  | C | 3.1577  | 1.8268  | -0.0228 |
| 87  | H | 2.5841  | 2.7578  | -0.1485 |
| 88  | C | 4.5918  | 2.0780  | -0.4903 |
| 89  | H | 4.9924  | 2.9387  | 0.0652  |
| 90  | H | 4.6825  | 2.3048  | -1.5581 |
| 91  | H | 5.2422  | 1.2222  | -0.2748 |
| 92  | C | 3.1375  | 1.4721  | 1.4642  |
| 93  | H | 3.6544  | 0.5235  | 1.6637  |
| 94  | H | 2.1166  | 1.3842  | 1.8540  |
| 95  | H | 3.6576  | 2.2591  | 2.0299  |
| 96  | C | 3.2347  | -0.7703 | -1.6411 |
| 97  | H | 2.5014  | -1.5164 | -1.9754 |
| 98  | C | 4.0955  | -0.3983 | -2.8426 |
| 99  | H | 4.8865  | 0.3157  | -2.5829 |
| 100 | H | 3.4981  | 0.0321  | -3.6564 |
| 101 | H | 4.5804  | -1.3069 | -3.2300 |
| 102 | C | 4.0442  | -1.4039 | -0.5106 |
| 103 | H | 4.4554  | -2.3629 | -0.8572 |
| 104 | H | 3.4339  | -1.6074 | 0.3780  |
| 105 | H | 4.8892  | -0.7756 | -0.2042 |
| 106 | C | -3.1163 | -1.4331 | 4.2702  |
| 107 | N | -3.4623 | -2.4429 | 3.8197  |
| 108 | C | -2.6756 | -0.1660 | 4.8224  |
| 109 | H | -1.7258 | 0.1225  | 4.3529  |
| 110 | H | -2.5339 | -0.2533 | 5.9073  |
| 111 | H | -3.4222 | 0.6126  | 4.6200  |

/db/nbandeira/Fe(NPiso)/L=CO2/1e-/1-CO2H+1e-

Energy (POTENTIAL) = -4061.59801853 Eh

|    | Atom | X       | Y       | Z       |
|----|------|---------|---------|---------|
| 1  | Fe   | -0.0498 | -0.0211 | -0.4216 |
| 2  | P    | -0.7878 | -2.2793 | -0.6581 |
| 3  | P    | -1.7057 | 1.7693  | -0.6682 |
| 4  | P    | 2.1120  | 0.7738  | -0.9456 |
| 5  | N    | -0.2690 | -0.0286 | -2.5928 |
| 6  | C    | 0.2864  | -1.3002 | -3.0444 |
| 7  | C    | 1.0103  | -1.3898 | -4.2302 |
| 8  | H    | 1.2267  | -0.4970 | -4.8126 |
| 9  | C    | 1.4549  | -2.6298 | -4.6815 |
| 10 | H    | 2.0316  | -2.6803 | -5.6051 |
| 11 | C    | 1.1572  | -3.8055 | -3.9850 |
| 12 | C    | 0.4371  | -3.6928 | -2.7906 |
| 13 | H    | 0.2133  | -4.6015 | -2.2328 |
| 14 | C    | 0.0215  | -2.4554 | -2.2925 |
| 15 | C    | 1.5799  | -5.1485 | -4.5033 |
| 16 | H    | 0.7879  | -5.5838 | -5.1318 |
| 17 | H    | 1.7724  | -5.8522 | -3.6836 |
| 18 | H    | 2.4841  | -5.0716 | -5.1198 |
| 19 | C    | -1.7055 | 0.0640  | -2.8628 |
| 20 | C    | -2.2873 | -0.6742 | -3.8904 |
| 21 | H    | -1.6860 | -1.3545 | -4.4897 |
| 22 | C    | -3.6499 | -0.5540 | -4.1498 |
| 23 | H    | -4.0909 | -1.1515 | -4.9479 |
| 24 | C    | -4.4565 | 0.3158  | -3.4085 |
| 25 | C    | -3.8521 | 1.0551  | -2.3853 |
| 26 | H    | -4.4764 | 1.7211  | -1.7903 |
| 27 | C    | -2.4901 | 0.9414  | -2.0951 |
| 28 | C    | -5.9183 | 0.4696  | -3.7088 |
| 29 | H    | -6.0736 | 1.2445  | -4.4752 |
| 30 | H    | -6.4808 | 0.7721  | -2.8166 |
| 31 | H    | -6.3471 | -0.4638 | -4.0948 |
| 32 | C    | 0.4421  | 1.1273  | -3.1357 |
| 33 | C    | -0.0268 | 1.7718  | -4.2792 |
| 34 | H    | -0.9274 | 1.4189  | -4.7771 |
| 35 | C    | 0.6386  | 2.8878  | -4.7755 |
| 36 | H    | 0.2473  | 3.3876  | -5.6616 |
| 37 | C    | 1.7883  | 3.3826  | -4.1494 |
| 38 | C    | 2.2497  | 2.7169  | -3.0096 |

|    |   |         |         |         |
|----|---|---------|---------|---------|
| 39 | H | 3.1320  | 3.1100  | -2.5095 |
| 40 | C | 1.5960  | 1.5938  | -2.4930 |
| 41 | C | 2.5127  | 4.5798  | -4.6898 |
| 42 | H | 3.1559  | 5.0373  | -3.9281 |
| 43 | H | 1.8089  | 5.3384  | -5.0560 |
| 44 | H | 3.1526  | 4.2910  | -5.5374 |
| 45 | C | -0.1227 | -3.6978 | 0.3520  |
| 46 | H | -0.5606 | -4.5928 | -0.1186 |
| 47 | C | 1.4022  | -3.7931 | 0.2908  |
| 48 | H | 1.8655  | -2.9461 | 0.8060  |
| 49 | H | 1.8001  | -3.8329 | -0.7289 |
| 50 | H | 1.7128  | -4.7131 | 0.8062  |
| 51 | C | -0.5803 | -3.6525 | 1.8120  |
| 52 | H | -0.1584 | -4.5251 | 2.3306  |
| 53 | H | -1.6654 | -3.6933 | 1.9313  |
| 54 | H | -0.2109 | -2.7586 | 2.3273  |
| 55 | C | -2.6084 | -2.5884 | -0.9803 |
| 56 | H | -2.9485 | -1.6355 | -1.4067 |
| 57 | C | -2.8272 | -3.6889 | -2.0140 |
| 58 | H | -2.4347 | -4.6563 | -1.6693 |
| 59 | H | -2.3701 | -3.4537 | -2.9824 |
| 60 | H | -3.9088 | -3.8077 | -2.1747 |
| 61 | C | -3.4155 | -2.8575 | 0.2873  |
| 62 | H | -4.4816 | -2.7328 | 0.0512  |
| 63 | H | -3.1724 | -2.1719 | 1.1071  |
| 64 | H | -3.2753 | -3.8883 | 0.6367  |
| 65 | C | -3.0647 | 1.9786  | 0.5761  |
| 66 | H | -3.8615 | 2.5396  | 0.0651  |
| 67 | C | -3.5998 | 0.6135  | 0.9952  |
| 68 | H | -2.8219 | 0.0298  | 1.5033  |
| 69 | H | -3.9769 | 0.0328  | 0.1445  |
| 70 | H | -4.4337 | 0.7512  | 1.6986  |
| 71 | C | -2.6031 | 2.7905  | 1.7862  |
| 72 | H | -3.3957 | 2.7662  | 2.5477  |
| 73 | H | -2.4227 | 3.8421  | 1.5385  |
| 74 | H | -1.6941 | 2.3694  | 2.2338  |
| 75 | C | -1.1888 | 3.4501  | -1.2855 |
| 76 | H | -0.5765 | 3.2013  | -2.1620 |
| 77 | C | -2.3715 | 4.2893  | -1.7548 |
| 78 | H | -3.0284 | 4.5717  | -0.9204 |
| 79 | H | -2.9725 | 3.7684  | -2.5121 |

|     |   |         |         |         |
|-----|---|---------|---------|---------|
| 80  | H | -1.9953 | 5.2173  | -2.2096 |
| 81  | C | -0.2999 | 4.1937  | -0.2893 |
| 82  | H | 0.2674  | 4.9691  | -0.8227 |
| 83  | H | 0.4205  | 3.5312  | 0.2054  |
| 84  | H | -0.8869 | 4.6910  | 0.4914  |
| 85  | C | 2.9908  | 2.0990  | 0.0297  |
| 86  | H | 2.4443  | 2.9986  | -0.2893 |
| 87  | C | 4.4681  | 2.2922  | -0.3175 |
| 88  | H | 4.8072  | 3.2275  | 0.1500  |
| 89  | H | 4.6644  | 2.3725  | -1.3923 |
| 90  | H | 5.0897  | 1.4832  | 0.0822  |
| 91  | C | 2.7998  | 1.9523  | 1.5369  |
| 92  | H | 3.2648  | 1.0376  | 1.9250  |
| 93  | H | 1.7400  | 1.9600  | 1.8206  |
| 94  | H | 3.2790  | 2.8083  | 2.0328  |
| 95  | C | 3.2327  | -0.6444 | -1.4305 |
| 96  | H | 2.5081  | -1.4229 | -1.7118 |
| 97  | C | 4.0975  | -0.3506 | -2.6523 |
| 98  | H | 4.8666  | 0.4035  | -2.4435 |
| 99  | H | 3.5046  | -0.0124 | -3.5111 |
| 100 | H | 4.6099  | -1.2783 | -2.9458 |
| 101 | C | 4.0452  | -1.1784 | -0.2522 |
| 102 | H | 4.4567  | -2.1588 | -0.5304 |
| 103 | H | 3.4379  | -1.3119 | 0.6488  |
| 104 | H | 4.8900  | -0.5244 | -0.0074 |
| 105 | C | 0.4081  | -0.2801 | 1.4134  |
| 106 | O | -0.4053 | 0.2549  | 2.1262  |
| 107 | O | 1.4722  | -0.9327 | 1.8367  |
| 108 | H | 1.5088  | -0.9214 | 2.8157  |

/db/nbandeira/Fe(NPiso)/L=Cl/1e-/1-Cl+NCMe

Energy (POTENTIAL) = -4466.89254868127591 Eh

|    | Atom | X       | Y       | Z       |
|----|------|---------|---------|---------|
| 1  | Fe   | -0.0321 | -0.0789 | 0.0712  |
| 2  | P    | -0.7476 | -2.2163 | -0.7124 |
| 3  | P    | -1.6250 | 1.5229  | -0.5651 |
| 4  | P    | 2.0363  | 0.5396  | -0.9525 |
| 5  | Cl   | 0.0765  | -0.1865 | 2.4509  |
| 6  | N    | -0.3242 | -0.0541 | -2.8191 |
| 7  | C    | 0.2485  | -1.3054 | -3.1816 |
| 8  | C    | 0.9855  | -1.4228 | -4.3643 |
| 9  | H    | 1.1172  | -0.5462 | -4.9970 |
| 10 | C    | 1.5455  | -2.6404 | -4.7359 |
| 11 | H    | 2.1228  | -2.7068 | -5.6592 |
| 12 | C    | 1.3578  | -3.7822 | -3.9486 |
| 13 | C    | 0.6046  | -3.6521 | -2.7768 |
| 14 | H    | 0.4547  | -4.5431 | -2.1677 |
| 15 | C    | 0.0667  | -2.4302 | -2.3553 |
| 16 | C    | 1.9687  | -5.1006 | -4.3321 |
| 17 | H    | 1.9288  | -5.2607 | -5.4181 |
| 18 | H    | 1.4565  | -5.9375 | -3.8401 |
| 19 | H    | 3.0285  | -5.1436 | -4.0369 |
| 20 | C    | -1.7396 | 0.0528  | -2.9542 |
| 21 | C    | -2.3983 | -0.6264 | -3.9830 |
| 22 | H    | -1.8203 | -1.2453 | -4.6679 |
| 23 | C    | -3.7786 | -0.5304 | -4.1311 |
| 24 | H    | -4.2719 | -1.0828 | -4.9321 |
| 25 | C    | -4.5346 | 0.2742  | -3.2722 |
| 26 | C    | -3.8603 | 0.9541  | -2.2505 |
| 27 | H    | -4.4547 | 1.5620  | -1.5689 |
| 28 | C    | -2.4788 | 0.8469  | -2.0536 |
| 29 | C    | -6.0201 | 0.4198  | -3.4467 |
| 30 | H    | -6.2540 | 1.1826  | -4.2055 |
| 31 | H    | -6.5053 | 0.7283  | -2.5116 |
| 32 | H    | -6.4789 | -0.5205 | -3.7805 |
| 33 | C    | 0.4058  | 1.1171  | -3.1783 |
| 34 | C    | -0.0482 | 1.9103  | -4.2382 |
| 35 | H    | -0.9262 | 1.5922  | -4.7985 |
| 36 | C    | 0.5809  | 3.1077  | -4.5598 |
| 37 | H    | 0.1960  | 3.7149  | -5.3802 |
| 38 | C    | 1.6942  | 3.5390  | -3.8313 |

|    |   |         |         |         |
|----|---|---------|---------|---------|
| 39 | C | 2.1537  | 2.7214  | -2.7933 |
| 40 | H | 3.0083  | 3.0761  | -2.2244 |
| 41 | C | 1.5408  | 1.5115  | -2.4427 |
| 42 | C | 2.3893  | 4.8296  | -4.1619 |
| 43 | H | 3.0122  | 5.1740  | -3.3265 |
| 44 | H | 1.6684  | 5.6218  | -4.4051 |
| 45 | H | 3.0461  | 4.7101  | -5.0373 |
| 46 | C | -0.1040 | -3.6848 | 0.2617  |
| 47 | H | -0.3879 | -4.6067 | -0.2688 |
| 48 | C | 1.4162  | -3.6000 | 0.3762  |
| 49 | H | 1.6958  | -2.7287 | 0.9840  |
| 50 | H | 1.9249  | -3.5130 | -0.5909 |
| 51 | H | 1.8027  | -4.4980 | 0.8817  |
| 52 | C | -0.6868 | -3.7294 | 1.6770  |
| 53 | H | -0.1578 | -4.5010 | 2.2574  |
| 54 | H | -1.7511 | -3.9762 | 1.7029  |
| 55 | H | -0.5439 | -2.7662 | 2.1869  |
| 56 | C | -2.5366 | -2.6585 | -1.1443 |
| 57 | H | -2.9028 | -1.7192 | -1.5798 |
| 58 | C | -2.6727 | -3.7553 | -2.1946 |
| 59 | H | -2.2248 | -4.7012 | -1.8544 |
| 60 | H | -2.2034 | -3.4815 | -3.1472 |
| 61 | H | -3.7394 | -3.9474 | -2.3901 |
| 62 | C | -3.4148 | -2.9789 | 0.0637  |
| 63 | H | -4.4714 | -2.8507 | -0.2158 |
| 64 | H | -3.2211 | -2.3362 | 0.9293  |
| 65 | H | -3.2896 | -4.0229 | 0.3805  |
| 66 | C | -3.0237 | 1.7628  | 0.6517  |
| 67 | H | -3.8191 | 2.3495  | 0.1693  |
| 68 | C | -3.5758 | 0.4012  | 1.0573  |
| 69 | H | -2.7882 | -0.2015 | 1.5288  |
| 70 | H | -3.9655 | -0.1616 | 0.1999  |
| 71 | H | -4.3952 | 0.5217  | 1.7829  |
| 72 | C | -2.5412 | 2.5317  | 1.8818  |
| 73 | H | -3.3189 | 2.5026  | 2.6602  |
| 74 | H | -2.3390 | 3.5865  | 1.6621  |
| 75 | H | -1.6308 | 2.0792  | 2.3002  |
| 76 | C | -1.1876 | 3.2649  | -1.1241 |
| 77 | H | -0.6614 | 3.0747  | -2.0685 |
| 78 | C | -2.3889 | 4.1514  | -1.4291 |
| 79 | H | -2.9447 | 4.4189  | -0.5191 |

|     |   |         |         |         |
|-----|---|---------|---------|---------|
| 80  | H | -3.0876 | 3.6667  | -2.1251 |
| 81  | H | -2.0532 | 5.0905  | -1.8958 |
| 82  | C | -0.1888 | 3.9345  | -0.1844 |
| 83  | H | 0.2614  | 4.8100  | -0.6761 |
| 84  | H | 0.6225  | 3.2465  | 0.0856  |
| 85  | H | -0.6567 | 4.2824  | 0.7448  |
| 86  | C | 3.1363  | 1.7420  | -0.0065 |
| 87  | H | 2.5684  | 2.6818  | -0.0829 |
| 88  | C | 4.5576  | 2.0072  | -0.5073 |
| 89  | H | 4.9736  | 2.8647  | 0.0436  |
| 90  | H | 4.6238  | 2.2402  | -1.5755 |
| 91  | H | 5.2176  | 1.1526  | -0.3161 |
| 92  | C | 3.1739  | 1.3614  | 1.4742  |
| 93  | H | 3.7359  | 0.4308  | 1.6360  |
| 94  | H | 2.1684  | 1.2145  | 1.8881  |
| 95  | H | 3.6790  | 2.1549  | 2.0463  |
| 96  | C | 3.1687  | -0.7979 | -1.6474 |
| 97  | H | 2.4410  | -1.5512 | -1.9770 |
| 98  | C | 4.0085  | -0.4130 | -2.8601 |
| 99  | H | 4.7937  | 0.3113  | -2.6105 |
| 100 | H | 3.3947  | 0.0140  | -3.6634 |
| 101 | H | 4.5025  | -1.3114 | -3.2622 |
| 102 | C | 4.0138  | -1.4398 | -0.5484 |
| 103 | H | 4.4155  | -2.3997 | -0.9066 |
| 104 | H | 3.4325  | -1.6442 | 0.3588  |
| 105 | H | 4.8691  | -0.8142 | -0.2649 |
| 106 | C | -3.2518 | -1.4849 | 4.2326  |
| 107 | N | -3.6818 | -2.4662 | 3.7910  |
| 108 | C | -2.6967 | -0.2557 | 4.7656  |
| 109 | H | -1.7468 | -0.0432 | 4.2512  |
| 110 | H | -2.5174 | -0.3560 | 5.8438  |
| 111 | H | -3.3905 | 0.5770  | 4.5930  |

/db/nbandeira/Fe(NPiso)/L=CO2/1e-/1-CO2+1e-

Energy (POTENTIAL) = -4061.17775504 Eh

|    | Atom | X       | Y       | Z       |
|----|------|---------|---------|---------|
| 1  | Fe   | -0.0541 | 0.0102  | 0.0228  |
| 2  | P    | -0.6721 | -2.2475 | -0.6546 |
| 3  | P    | -1.7117 | 1.6610  | -0.6211 |
| 4  | P    | 2.0865  | 0.7260  | -0.9894 |
| 5  | N    | -0.2867 | -0.0531 | -2.7212 |
| 6  | C    | 0.2843  | -1.3088 | -3.1119 |
| 7  | C    | 1.0034  | -1.4258 | -4.3025 |
| 8  | H    | 1.1740  | -0.5445 | -4.9180 |
| 9  | C    | 1.4923  | -2.6620 | -4.7156 |
| 10 | H    | 2.0577  | -2.7275 | -5.6458 |
| 11 | C    | 1.2483  | -3.8195 | -3.9701 |
| 12 | C    | 0.5381  | -3.6847 | -2.7721 |
| 13 | H    | 0.3625  | -4.5800 | -2.1763 |
| 14 | C    | 0.0779  | -2.4474 | -2.3123 |
| 15 | C    | 1.7148  | -5.1688 | -4.4360 |
| 16 | H    | 0.8891  | -5.7256 | -4.9049 |
| 17 | H    | 2.0818  | -5.7771 | -3.5985 |
| 18 | H    | 2.5178  | -5.0799 | -5.1783 |
| 19 | C    | -1.7059 | 0.0386  | -2.9156 |
| 20 | C    | -2.3307 | -0.6876 | -3.9320 |
| 21 | H    | -1.7445 | -1.3712 | -4.5435 |
| 22 | C    | -3.6930 | -0.5431 | -4.1722 |
| 23 | H    | -4.1604 | -1.1308 | -4.9631 |
| 24 | C    | -4.4626 | 0.3586  | -3.4294 |
| 25 | C    | -3.8256 | 1.0729  | -2.4096 |
| 26 | H    | -4.4304 | 1.7547  | -1.8137 |
| 27 | C    | -2.4668 | 0.9115  | -2.1150 |
| 28 | C    | -5.9215 | 0.5638  | -3.7192 |
| 29 | H    | -6.0585 | 1.3060  | -4.5206 |
| 30 | H    | -6.4579 | 0.9312  | -2.8350 |
| 31 | H    | -6.3973 | -0.3676 | -4.0529 |
| 32 | C    | 0.4150  | 1.1060  | -3.1972 |
| 33 | C    | -0.0769 | 1.8153  | -4.2984 |
| 34 | H    | -0.9780 | 1.4691  | -4.8010 |
| 35 | C    | 0.5553  | 2.9698  | -4.7411 |
| 36 | H    | 0.1439  | 3.5122  | -5.5930 |
| 37 | C    | 1.7079  | 3.4425  | -4.1029 |
| 38 | C    | 2.1981  | 2.7131  | -3.0167 |

|    |   |         |         |         |
|----|---|---------|---------|---------|
| 39 | H | 3.0817  | 3.0972  | -2.5148 |
| 40 | C | 1.5751  | 1.5504  | -2.5427 |
| 41 | C | 2.3949  | 4.6927  | -4.5720 |
| 42 | H | 3.1876  | 4.9993  | -3.8782 |
| 43 | H | 1.6825  | 5.5237  | -4.6693 |
| 44 | H | 2.8520  | 4.5415  | -5.5612 |
| 45 | C | 0.0272  | -3.6757 | 0.3268  |
| 46 | H | -0.3374 | -4.5900 | -0.1659 |
| 47 | C | 1.5536  | -3.6520 | 0.3077  |
| 48 | H | 1.9236  | -2.7626 | 0.8329  |
| 49 | H | 1.9843  | -3.6587 | -0.7000 |
| 50 | H | 1.9348  | -4.5345 | 0.8417  |
| 51 | C | -0.4357 | -3.6941 | 1.7847  |
| 52 | H | -0.0413 | -4.6044 | 2.2591  |
| 53 | H | -1.5211 | -3.7017 | 1.9064  |
| 54 | H | -0.0328 | -2.8380 | 2.3406  |
| 55 | C | -2.4949 | -2.5822 | -0.9386 |
| 56 | H | -2.8317 | -1.6487 | -1.4090 |
| 57 | C | -2.7444 | -3.7293 | -1.9112 |
| 58 | H | -2.3554 | -4.6822 | -1.5236 |
| 59 | H | -2.2931 | -3.5465 | -2.8941 |
| 60 | H | -3.8285 | -3.8482 | -2.0562 |
| 61 | C | -3.2934 | -2.7645 | 0.3505  |
| 62 | H | -4.3579 | -2.5955 | 0.1335  |
| 63 | H | -2.9957 | -2.0645 | 1.1397  |
| 64 | H | -3.1983 | -3.7879 | 0.7362  |
| 65 | C | -3.1716 | 2.0006  | 0.4842  |
| 66 | H | -3.8290 | 2.6772  | -0.0812 |
| 67 | C | -3.9379 | 0.7237  | 0.8218  |
| 68 | H | -3.3536 | 0.0935  | 1.5004  |
| 69 | H | -4.1977 | 0.1296  | -0.0623 |
| 70 | H | -4.8752 | 0.9934  | 1.3306  |
| 71 | C | -2.7439 | 2.7229  | 1.7622  |
| 72 | H | -3.6042 | 2.7788  | 2.4447  |
| 73 | H | -2.4104 | 3.7488  | 1.5731  |
| 74 | H | -1.9409 | 2.1882  | 2.2884  |
| 75 | C | -1.0719 | 3.3274  | -1.1733 |
| 76 | H | -0.4279 | 3.0575  | -2.0183 |
| 77 | C | -2.1672 | 4.2506  | -1.6925 |
| 78 | H | -2.8402 | 4.5804  | -0.8890 |
| 79 | H | -2.7688 | 3.7719  | -2.4773 |

|     |   |         |         |         |
|-----|---|---------|---------|---------|
| 80  | H | -1.7071 | 5.1500  | -2.1282 |
| 81  | C | -0.1894 | 3.9972  | -0.1209 |
| 82  | H | 0.4461  | 4.7509  | -0.6073 |
| 83  | H | 0.4697  | 3.2832  | 0.3908  |
| 84  | H | -0.7802 | 4.5115  | 0.6462  |
| 85  | C | 3.1222  | 2.0275  | -0.1228 |
| 86  | H | 2.5670  | 2.9493  | -0.3527 |
| 87  | C | 4.5644  | 2.2121  | -0.5985 |
| 88  | H | 4.9609  | 3.1414  | -0.1631 |
| 89  | H | 4.6709  | 2.2862  | -1.6860 |
| 90  | H | 5.2109  | 1.3948  | -0.2577 |
| 91  | C | 3.0843  | 1.8438  | 1.3943  |
| 92  | H | 3.5546  | 0.9011  | 1.7044  |
| 93  | H | 2.0608  | 1.8504  | 1.7849  |
| 94  | H | 3.6407  | 2.6653  | 1.8693  |
| 95  | C | 3.1879  | -0.7024 | -1.4915 |
| 96  | H | 2.4511  | -1.4761 | -1.7478 |
| 97  | C | 4.0546  | -0.4658 | -2.7224 |
| 98  | H | 4.8580  | 0.2564  | -2.5321 |
| 99  | H | 3.4648  | -0.1067 | -3.5754 |
| 100 | H | 4.5245  | -1.4156 | -3.0191 |
| 101 | C | 3.9953  | -1.2135 | -0.2988 |
| 102 | H | 4.3703  | -2.2234 | -0.5185 |
| 103 | H | 3.3970  | -1.2746 | 0.6190  |
| 104 | H | 4.8643  | -0.5781 | -0.0909 |
| 105 | C | -0.5880 | -0.2970 | 1.9002  |
| 106 | O | -1.5156 | -0.5729 | 2.6106  |
| 107 | O | 0.6296  | -0.0544 | 1.9633  |

/db/nbandeira/Fe(NPiso)/NCMe\_substitution\_/2e-/1-NCMe+Cl-

Energy (POTENTIAL) = -4456.34947219861624 Eh

|    | Atom | X       | Y       | Z       |
|----|------|---------|---------|---------|
| 1  | Fe   | -0.3137 | 1.4408  | 2.7667  |
| 2  | P    | -0.9841 | -0.6999 | 1.9498  |
| 3  | P    | -1.9048 | 3.0658  | 2.1086  |
| 4  | P    | 1.7724  | 2.0884  | 1.7998  |
| 5  | N    | -0.5247 | 1.5015  | -0.1114 |
| 6  | C    | 0.0748  | 0.2685  | -0.4650 |
| 7  | C    | 0.8535  | 0.1819  | -1.6247 |
| 8  | H    | 0.9900  | 1.0710  | -2.2383 |
| 9  | C    | 1.4533  | -1.0242 | -1.9962 |
| 10 | H    | 2.0658  | -1.0648 | -2.8985 |
| 11 | C    | 1.2636  | -2.1770 | -1.2360 |
| 12 | C    | 0.4701  | -2.0790 | -0.0797 |
| 13 | H    | 0.3337  | -2.9798 | 0.5178  |
| 14 | C    | -0.1133 | -0.8779 | 0.3350  |
| 15 | C    | 1.8780  | -3.4929 | -1.6247 |
| 16 | H    | 2.5334  | -3.3851 | -2.4986 |
| 17 | H    | 1.1061  | -4.2369 | -1.8739 |
| 18 | H    | 2.4748  | -3.9153 | -0.8029 |
| 19 | C    | -1.9402 | 1.5901  | -0.2750 |
| 20 | C    | -2.5770 | 0.8816  | -1.2800 |
| 21 | H    | -1.9794 | 0.2315  | -1.9212 |
| 22 | C    | -3.9711 | 0.9857  | -1.4849 |
| 23 | H    | -4.4611 | 0.4038  | -2.2666 |
| 24 | C    | -4.7131 | 1.9190  | -0.7022 |
| 25 | C    | -4.0667 | 2.6469  | 0.2796  |
| 26 | H    | -4.6594 | 3.3549  | 0.8624  |
| 27 | C    | -2.6693 | 2.4841  | 0.5862  |
| 28 | C    | -6.1834 | 2.1028  | -0.9619 |
| 29 | H    | -6.3756 | 2.4478  | -1.9914 |
| 30 | H    | -6.6286 | 2.8348  | -0.2740 |
| 31 | H    | -6.7330 | 1.1541  | -0.8466 |
| 32 | C    | 0.2016  | 2.6770  | -0.4461 |
| 33 | C    | -0.2621 | 3.5065  | -1.4751 |
| 34 | H    | -1.1623 | 3.2098  | -2.0122 |
| 35 | C    | 0.3971  | 4.6867  | -1.7958 |
| 36 | H    | 0.0100  | 5.3203  | -2.5957 |
| 37 | C    | 1.5508  | 5.0687  | -1.0995 |
| 38 | C    | 2.0039  | 4.2298  | -0.0775 |

|    |   |         |         |         |
|----|---|---------|---------|---------|
| 39 | H | 2.8867  | 4.5460  | 0.4712  |
| 40 | C | 1.3485  | 3.0426  | 0.2807  |
| 41 | C | 2.2759  | 6.3416  | -1.4375 |
| 42 | H | 3.0924  | 6.5352  | -0.7300 |
| 43 | H | 1.5972  | 7.2065  | -1.4185 |
| 44 | H | 2.7105  | 6.2969  | -2.4476 |
| 45 | C | -0.3518 | -2.1789 | 2.9139  |
| 46 | H | -0.5139 | -3.0860 | 2.3128  |
| 47 | C | 1.1423  | -1.9969 | 3.1623  |
| 48 | H | 1.3144  | -1.1157 | 3.7964  |
| 49 | H | 1.7135  | -1.8632 | 2.2362  |
| 50 | H | 1.5490  | -2.8744 | 3.6879  |
| 51 | C | -1.0679 | -2.3606 | 4.2528  |
| 52 | H | -0.4850 | -3.0498 | 4.8830  |
| 53 | H | -2.0680 | -2.7900 | 4.1439  |
| 54 | H | -1.1793 | -1.4195 | 4.8080  |
| 55 | C | -2.7613 | -1.1080 | 1.4826  |
| 56 | H | -3.0733 | -0.1715 | 1.0014  |
| 57 | C | -2.8867 | -2.2306 | 0.4596  |
| 58 | H | -2.5135 | -3.1864 | 0.8585  |
| 59 | H | -2.3407 | -2.0081 | -0.4650 |
| 60 | H | -3.9468 | -2.3732 | 0.1963  |
| 61 | C | -3.6915 | -1.3679 | 2.6681  |
| 62 | H | -4.7274 | -1.1495 | 2.3674  |
| 63 | H | -3.4702 | -0.7628 | 3.5546  |
| 64 | H | -3.6623 | -2.4229 | 2.9714  |
| 65 | C | -3.3562 | 3.3601  | 3.2598  |
| 66 | H | -4.0518 | 4.0333  | 2.7364  |
| 67 | C | -4.0765 | 2.0497  | 3.5546  |
| 68 | H | -3.4741 | 1.4059  | 4.2104  |
| 69 | H | -4.3134 | 1.4935  | 2.6393  |
| 70 | H | -5.0208 | 2.2481  | 4.0868  |
| 71 | C | -2.9388 | 4.0300  | 4.5678  |
| 72 | H | -3.7837 | 4.0267  | 5.2745  |
| 73 | H | -2.6345 | 5.0736  | 4.4301  |
| 74 | H | -2.1070 | 3.4924  | 5.0458  |
| 75 | C | -1.2888 | 4.8170  | 1.7442  |
| 76 | H | -0.6457 | 4.6241  | 0.8756  |
| 77 | C | -2.3812 | 5.7816  | 1.3037  |
| 78 | H | -3.0544 | 6.0446  | 2.1332  |
| 79 | H | -2.9893 | 5.3505  | 0.4954  |

|     |    |         |         |         |
|-----|----|---------|---------|---------|
| 80  | H  | -1.9425 | 6.7205  | 0.9286  |
| 81  | C  | -0.4026 | 5.3944  | 2.8453  |
| 82  | H  | 0.2931  | 6.1410  | 2.4320  |
| 83  | H  | 0.1970  | 4.6118  | 3.3326  |
| 84  | H  | -0.9869 | 5.8954  | 3.6279  |
| 85  | C  | 2.7962  | 3.3323  | 2.7856  |
| 86  | H  | 2.2420  | 4.2672  | 2.6126  |
| 87  | C  | 4.2583  | 3.5803  | 2.4098  |
| 88  | H  | 4.6271  | 4.4502  | 2.9750  |
| 89  | H  | 4.4188  | 3.7902  | 1.3470  |
| 90  | H  | 4.8975  | 2.7303  | 2.6766  |
| 91  | C  | 2.6932  | 3.0185  | 4.2784  |
| 92  | H  | 3.1669  | 2.0580  | 4.5261  |
| 93  | H  | 1.6497  | 2.9691  | 4.6092  |
| 94  | H  | 3.2043  | 3.8007  | 4.8606  |
| 95  | C  | 2.9618  | 0.7575  | 1.1969  |
| 96  | H  | 2.2662  | -0.0095 | 0.8300  |
| 97  | C  | 3.8642  | 1.1451  | 0.0312  |
| 98  | H  | 4.6159  | 1.8914  | 0.3164  |
| 99  | H  | 3.2861  | 1.5460  | -0.8109 |
| 100 | H  | 4.4017  | 0.2535  | -0.3283 |
| 101 | C  | 3.7511  | 0.1435  | 2.3525  |
| 102 | H  | 4.1755  | -0.8222 | 2.0395  |
| 103 | H  | 3.1251  | -0.0413 | 3.2338  |
| 104 | H  | 4.5874  | 0.7805  | 2.6656  |
| 105 | C  | -0.2604 | 1.2485  | 5.9037  |
| 106 | N  | -0.2414 | 1.3280  | 4.7459  |
| 107 | C  | -0.3485 | 1.1201  | 7.3405  |
| 108 | H  | 0.4617  | 0.4822  | 7.7182  |
| 109 | H  | -1.3281 | 0.6545  | 7.5584  |
| 110 | H  | -0.2819 | 2.1062  | 7.8197  |
| 111 | Cl | -3.3937 | -0.3328 | 6.6590  |

/db/nbandeira/Fe(NPiso)/L=Cl/Cl-

Energy (POTENTIAL) = -461.46795119 Eh

|   | Atom | X      | Y      | Z      |
|---|------|--------|--------|--------|
| 1 | Cl   | 0.0000 | 0.0000 | 0.0000 |

/db/nbandeira/Fe(NPiso)/L=NCMe/NCMe  
Energy (POTENTIAL) = -132.55828395 Eh

|   | Atom | X       | Y       | Z       |
|---|------|---------|---------|---------|
| 1 | C    | -0.0001 | 0.0000  | -0.1674 |
| 2 | N    | 0.0002  | -0.0000 | -1.3258 |
| 3 | C    | -0.0001 | 0.0000  | 1.2847  |
| 4 | H    | 1.0307  | -0.0000 | 1.6616  |
| 5 | H    | -0.5153 | -0.8926 | 1.6620  |
| 6 | H    | -0.5153 | 0.8926  | 1.6620  |

/db/nbandeira/Fe(NPiso)/L=Cl/1e-/1-Cl

Energy (POTENTIAL) = -4334.34566254 Eh

|    | Atom | X       | Y       | Z       |
|----|------|---------|---------|---------|
| 1  | Fe   | 0.0014  | 0.0067  | 0.0245  |
| 2  | P    | -0.7292 | -2.1554 | -0.6551 |
| 3  | P    | -1.6016 | 1.5902  | -0.6380 |
| 4  | P    | 2.0384  | 0.5641  | -1.0819 |
| 5  | Cl   | 0.0896  | 0.0006  | 2.3943  |
| 6  | N    | -0.3681 | -0.0868 | -2.8630 |
| 7  | C    | 0.1882  | -1.3540 | -3.1920 |
| 8  | C    | 0.8938  | -1.5223 | -4.3856 |
| 9  | H    | 1.0173  | -0.6718 | -5.0545 |
| 10 | C    | 1.4355  | -2.7594 | -4.7238 |
| 11 | H    | 1.9901  | -2.8665 | -5.6571 |
| 12 | C    | 1.2590  | -3.8674 | -3.8901 |
| 13 | C    | 0.5387  | -3.6853 | -2.7028 |
| 14 | H    | 0.4025  | -4.5494 | -2.0528 |
| 15 | C    | 0.0217  | -2.4451 | -2.3160 |
| 16 | C    | 1.8408  | -5.2103 | -4.2322 |
| 17 | H    | 2.1386  | -5.2602 | -5.2873 |
| 18 | H    | 1.1230  | -6.0192 | -4.0381 |
| 19 | H    | 2.7349  | -5.4194 | -3.6250 |
| 20 | C    | -1.7862 | 0.0210  | -2.9607 |
| 21 | C    | -2.4760 | -0.6986 | -3.9394 |
| 22 | H    | -1.9200 | -1.3488 | -4.6136 |
| 23 | C    | -3.8607 | -0.6054 | -4.0509 |
| 24 | H    | -4.3781 | -1.1899 | -4.8130 |
| 25 | C    | -4.5895 | 0.2361  | -3.2057 |
| 26 | C    | -3.8840 | 0.9560  | -2.2324 |
| 27 | H    | -4.4570 | 1.5929  | -1.5591 |
| 28 | C    | -2.4984 | 0.8542  | -2.0718 |
| 29 | C    | -6.0789 | 0.3839  | -3.3394 |
| 30 | H    | -6.3329 | 1.2561  | -3.9616 |
| 31 | H    | -6.5564 | 0.5332  | -2.3618 |
| 32 | H    | -6.5286 | -0.4985 | -3.8127 |
| 33 | C    | 0.3566  | 1.0665  | -3.2848 |
| 34 | C    | -0.1204 | 1.8184  | -4.3645 |
| 35 | H    | -1.0090 | 1.4774  | -4.8939 |
| 36 | C    | 0.4968  | 3.0056  | -4.7412 |
| 37 | H    | 0.0939  | 3.5816  | -5.5754 |
| 38 | C    | 1.6202  | 3.4682  | -4.0481 |

|    |   |         |         |         |
|----|---|---------|---------|---------|
| 39 | C | 2.1052  | 2.6890  | -2.9925 |
| 40 | H | 2.9681  | 3.0680  | -2.4525 |
| 41 | C | 1.5062  | 1.4887  | -2.5886 |
| 42 | C | 2.2972  | 4.7532  | -4.4331 |
| 43 | H | 2.9563  | 5.1132  | -3.6328 |
| 44 | H | 1.5644  | 5.5406  | -4.6561 |
| 45 | H | 2.9134  | 4.6198  | -5.3356 |
| 46 | C | -0.0536 | -3.5854 | 0.3541  |
| 47 | H | -0.3457 | -4.5280 | -0.1337 |
| 48 | C | 1.4683  | -3.4891 | 0.4222  |
| 49 | H | 1.7598  | -2.5866 | 0.9768  |
| 50 | H | 1.9487  | -3.4495 | -0.5626 |
| 51 | H | 1.8739  | -4.3590 | 0.9608  |
| 52 | C | -0.5987 | -3.5830 | 1.7851  |
| 53 | H | -0.0389 | -4.3193 | 2.3822  |
| 54 | H | -1.6560 | -3.8545 | 1.8446  |
| 55 | H | -0.4653 | -2.5970 | 2.2527  |
| 56 | C | -2.5364 | -2.6004 | -0.9938 |
| 57 | H | -2.9067 | -1.6836 | -1.4713 |
| 58 | C | -2.7268 | -3.7559 | -1.9697 |
| 59 | H | -2.2885 | -4.6889 | -1.5845 |
| 60 | H | -2.2789 | -3.5492 | -2.9493 |
| 61 | H | -3.8022 | -3.9361 | -2.1239 |
| 62 | C | -3.3711 | -2.8285 | 0.2658  |
| 63 | H | -4.4347 | -2.6803 | 0.0262  |
| 64 | H | -3.1155 | -2.1440 | 1.0828  |
| 65 | H | -3.2638 | -3.8572 | 0.6343  |
| 66 | C | -2.9689 | 1.9115  | 0.5956  |
| 67 | H | -3.7625 | 2.4862  | 0.0957  |
| 68 | C | -3.5388 | 0.5877  | 1.0927  |
| 69 | H | -2.7623 | 0.0202  | 1.6236  |
| 70 | H | -3.9213 | -0.0361 | 0.2753  |
| 71 | H | -4.3687 | 0.7718  | 1.7926  |
| 72 | C | -2.4509 | 2.7358  | 1.7739  |
| 73 | H | -3.2318 | 2.7977  | 2.5473  |
| 74 | H | -2.1936 | 3.7622  | 1.4885  |
| 75 | H | -1.5676 | 2.2625  | 2.2257  |
| 76 | C | -1.1652 | 3.2997  | -1.2923 |
| 77 | H | -0.6673 | 3.0556  | -2.2388 |
| 78 | C | -2.3640 | 4.1832  | -1.6157 |
| 79 | H | -2.8959 | 4.5049  | -0.7089 |

|     |   |         |         |         |
|-----|---|---------|---------|---------|
| 80  | H | -3.0836 | 3.6715  | -2.2699 |
| 81  | H | -2.0292 | 5.0926  | -2.1385 |
| 82  | C | -0.1346 | 4.0078  | -0.4164 |
| 83  | H | 0.3584  | 4.8085  | -0.9877 |
| 84  | H | 0.6427  | 3.3120  | -0.0751 |
| 85  | H | -0.5851 | 4.4681  | 0.4722  |
| 86  | C | 3.1633  | 1.7901  | -0.2005 |
| 87  | H | 2.5915  | 2.7268  | -0.2841 |
| 88  | C | 4.5686  | 2.0444  | -0.7497 |
| 89  | H | 4.9975  | 2.9209  | -0.2401 |
| 90  | H | 4.6019  | 2.2418  | -1.8266 |
| 91  | H | 5.2375  | 1.1987  | -0.5507 |
| 92  | C | 3.2425  | 1.4445  | 1.2873  |
| 93  | H | 3.8135  | 0.5204  | 1.4549  |
| 94  | H | 2.2487  | 1.3034  | 1.7309  |
| 95  | H | 3.7591  | 2.2526  | 1.8278  |
| 96  | C | 3.1516  | -0.7941 | -1.7716 |
| 97  | H | 2.4159  | -1.5604 | -2.0491 |
| 98  | C | 3.9452  | -0.4444 | -3.0254 |
| 99  | H | 4.7399  | 0.2851  | -2.8251 |
| 100 | H | 3.3028  | -0.0390 | -3.8173 |
| 101 | H | 4.4243  | -1.3542 | -3.4200 |
| 102 | C | 4.0429  | -1.3985 | -0.6875 |
| 103 | H | 4.4325  | -2.3687 | -1.0307 |
| 104 | H | 3.5005  | -1.5745 | 0.2491  |
| 105 | H | 4.9070  | -0.7622 | -0.4611 |

/db/nbandeira/Fe(NPiso)/\_Ir(ppy)2(dtb-bpy)\_+/0e-/Ir(ppy)2(dtb-bpy)\_+1H+

Energy (POTENTIAL) = -19597.03088083895636 Eh

| Atom | X       | Y       | Z       |
|------|---------|---------|---------|
| 1 C  | -1.6858 | 2.8051  | -0.2245 |
| 2 H  | -0.6693 | 3.1784  | -0.0787 |
| 3 C  | -2.7552 | 3.6708  | -0.3830 |
| 4 C  | -4.0506 | 3.1647  | -0.5606 |
| 5 C  | -4.1770 | 1.7743  | -0.5747 |
| 6 H  | -5.1540 | 1.3153  | -0.7128 |
| 7 C  | -3.0604 | 0.9549  | -0.4127 |
| 8 C  | -3.1331 | -0.5184 | -0.4260 |
| 9 C  | -4.3198 | -1.2310 | -0.6077 |
| 10 H | -5.2673 | -0.7083 | -0.7414 |
| 11 C | -4.2854 | -2.6211 | -0.6224 |
| 12 C | -3.0656 | -3.2697 | -0.4438 |
| 13 C | -1.9234 | -2.4995 | -0.2631 |
| 14 H | -0.9410 | -2.9563 | -0.1230 |
| 15 C | 1.2601  | 1.3944  | 0.0642  |
| 16 C | 1.8535  | 1.9592  | 1.2034  |
| 17 H | 1.5087  | 1.6701  | 2.2007  |
| 18 C | 2.8850  | 2.8929  | 1.0948  |
| 19 H | 3.3288  | 3.3179  | 2.0013  |
| 20 C | 3.3577  | 3.2897  | -0.1607 |
| 21 H | 4.1659  | 4.0222  | -0.2420 |
| 22 C | 2.7926  | 2.7438  | -1.3081 |
| 23 H | 3.1634  | 3.0540  | -2.2892 |
| 24 C | 1.7565  | 1.8052  | -1.1987 |
| 25 C | 1.1062  | 1.1802  | -2.3468 |
| 26 C | 1.4239  | 1.4122  | -3.6891 |
| 27 H | 2.2173  | 2.1175  | -3.9416 |
| 28 C | 0.7339  | 0.7452  | -4.6914 |
| 29 H | 0.9807  | 0.9227  | -5.7418 |
| 30 C | -0.2743 | -0.1524 | -4.3384 |
| 31 H | -0.8448 | -0.7031 | -5.0891 |
| 32 C | -0.5488 | -0.3417 | -2.9935 |
| 33 H | -1.3246 | -1.0375 | -2.6705 |
| 34 C | 1.0960  | -1.3846 | 0.2313  |
| 35 C | 1.8644  | -2.0426 | -0.7409 |
| 36 H | 1.7873  | -1.7449 | -1.7911 |
| 37 C | 2.7331  | -3.0789 | -0.3961 |
| 38 H | 3.3202  | -3.5760 | -1.1757 |

|    |    |         |         |         |
|----|----|---------|---------|---------|
| 39 | C  | 2.8620  | -3.4881 | 0.9357  |
| 40 | H  | 3.5430  | -4.3019 | 1.2012  |
| 41 | C  | 2.1179  | -2.8511 | 1.9228  |
| 42 | H  | 2.2202  | -3.1718 | 2.9636  |
| 43 | C  | 1.2453  | -1.8095 | 1.5758  |
| 44 | C  | 0.4294  | -1.0800 | 2.5418  |
| 45 | C  | 0.4348  | -1.2746 | 3.9276  |
| 46 | H  | 1.0831  | -2.0371 | 4.3617  |
| 47 | C  | -0.3743 | -0.4941 | 4.7416  |
| 48 | H  | -0.3690 | -0.6402 | 5.8252  |
| 49 | C  | -1.1916 | 0.4744  | 4.1573  |
| 50 | H  | -1.8465 | 1.1123  | 4.7542  |
| 51 | C  | -1.1625 | 0.6197  | 2.7792  |
| 52 | H  | -1.7825 | 1.3633  | 2.2765  |
| 53 | Ir | -0.2440 | 0.0778  | -0.0295 |
| 54 | N  | -1.8300 | 1.4756  | -0.2318 |
| 55 | N  | -1.9558 | -1.1628 | -0.2625 |
| 56 | N  | 0.1177  | 0.3024  | -2.0249 |
| 57 | N  | -0.3775 | -0.1310 | 1.9933  |
| 58 | H  | -2.5603 | 4.7450  | -0.3627 |
| 59 | H  | -2.9892 | -4.3594 | -0.4460 |
| 60 | C  | -5.2356 | 4.1069  | -0.7298 |
| 61 | C  | -3.8010 | -3.5832 | 3.0077  |
| 62 | C  | -3.0313 | -4.7853 | 3.2875  |
| 63 | H  | -3.6499 | -5.6325 | 3.6223  |
| 64 | H  | -2.6282 | -5.0622 | 2.2825  |
| 65 | H  | -2.1555 | -4.5972 | 3.9285  |
| 66 | C  | -5.2202 | -3.6910 | 2.7028  |
| 67 | H  | -5.4741 | -4.6532 | 2.2276  |
| 68 | H  | -5.6977 | -3.7283 | 3.7122  |
| 69 | H  | -5.6295 | -2.8215 | 2.1692  |
| 70 | C  | -5.0070 | 4.9587  | -1.9892 |
| 71 | H  | -4.0843 | 5.5591  | -1.9156 |
| 72 | H  | -4.9342 | 4.3214  | -2.8879 |
| 73 | H  | -5.8537 | 5.6541  | -2.1270 |
| 74 | C  | -6.5565 | 3.3504  | -0.8774 |
| 75 | H  | -7.3811 | 4.0748  | -0.9886 |
| 76 | H  | -6.5604 | 2.7007  | -1.7697 |
| 77 | H  | -6.7739 | 2.7289  | 0.0087  |
| 78 | C  | -5.3206 | 5.0176  | 0.5058  |
| 79 | H  | -6.1739 | 5.7103  | 0.3995  |

|    |   |         |         |         |
|----|---|---------|---------|---------|
| 80 | H | -5.4716 | 4.4229  | 1.4238  |
| 81 | H | -4.4077 | 5.6238  | 0.6328  |
| 82 | C | -3.1550 | -2.2833 | 3.0958  |
| 83 | H | -3.6278 | -1.5081 | 2.4744  |
| 84 | H | -3.3223 | -1.9903 | 4.1618  |
| 85 | H | -2.0631 | -2.3449 | 2.9683  |
| 86 | H | -5.2066 | -3.1909 | -0.7700 |

/db/nbandeira/Fe(NPiso)/L=NCMe/0e-/1-NCMe

Energy (POTENTIAL) = -4005.27028908 Eh

|    | Atom | X       | Y       | Z       |
|----|------|---------|---------|---------|
| 1  | Fe   | -0.3214 | 1.4520  | 2.6442  |
| 2  | P    | -1.0857 | -0.7771 | 1.9189  |
| 3  | P    | -1.9428 | 3.1873  | 2.1309  |
| 4  | P    | 1.8982  | 2.1422  | 1.8294  |
| 5  | N    | -0.4914 | 1.5292  | 0.0343  |
| 6  | C    | 0.0863  | 0.2834  | -0.3921 |
| 7  | C    | 0.8780  | 0.2219  | -1.5399 |
| 8  | H    | 1.0726  | 1.1277  | -2.1111 |
| 9  | C    | 1.4201  | -0.9890 | -1.9604 |
| 10 | H    | 2.0412  | -1.0110 | -2.8564 |
| 11 | C    | 1.1657  | -2.1749 | -1.2639 |
| 12 | C    | 0.3589  | -2.1004 | -0.1235 |
| 13 | H    | 0.1558  | -3.0208 | 0.4236  |
| 14 | C    | -0.1688 | -0.8913 | 0.3391  |
| 15 | C    | 1.7587  | -3.4832 | -1.7008 |
| 16 | H    | 1.9631  | -3.4888 | -2.7790 |
| 17 | H    | 1.0910  | -4.3227 | -1.4675 |
| 18 | H    | 2.7125  | -3.6700 | -1.1839 |
| 19 | C    | -1.9079 | 1.6391  | -0.1993 |
| 20 | C    | -2.5010 | 0.9657  | -1.2701 |
| 21 | H    | -1.8892 | 0.3416  | -1.9190 |
| 22 | C    | -3.8656 | 1.0797  | -1.5073 |
| 23 | H    | -4.3080 | 0.5353  | -2.3423 |
| 24 | C    | -4.6741 | 1.8889  | -0.6992 |
| 25 | C    | -4.0656 | 2.5681  | 0.3604  |
| 26 | H    | -4.6920 | 3.1908  | 0.9984  |
| 27 | C    | -2.6982 | 2.4496  | 0.6372  |
| 28 | C    | -6.1468 | 2.0144  | -0.9617 |
| 29 | H    | -6.3344 | 2.4161  | -1.9679 |
| 30 | H    | -6.6284 | 2.6790  | -0.2341 |
| 31 | H    | -6.6410 | 1.0337  | -0.9087 |
| 32 | C    | 0.2446  | 2.7008  | -0.3617 |
| 33 | C    | -0.1970 | 3.4757  | -1.4379 |
| 34 | H    | -1.0892 | 3.1772  | -1.9852 |
| 35 | C    | 0.4755  | 4.6367  | -1.7999 |
| 36 | H    | 0.1029  | 5.2301  | -2.6352 |
| 37 | C    | 1.6165  | 5.0522  | -1.1032 |
| 38 | C    | 2.0579  | 4.2567  | -0.0426 |

|    |   |         |         |         |
|----|---|---------|---------|---------|
| 39 | H | 2.9367  | 4.5870  | 0.5049  |
| 40 | C | 1.3953  | 3.0859  | 0.3459  |
| 41 | C | 2.3452  | 6.3073  | -1.4871 |
| 42 | H | 3.1137  | 6.5654  | -0.7482 |
| 43 | H | 1.6530  | 7.1558  | -1.5767 |
| 44 | H | 2.8403  | 6.1891  | -2.4624 |
| 45 | C | -0.4307 | -2.1901 | 2.9425  |
| 46 | H | -0.6332 | -3.1163 | 2.3843  |
| 47 | C | 1.0748  | -2.0178 | 3.1278  |
| 48 | H | 1.2859  | -1.1245 | 3.7323  |
| 49 | H | 1.6217  | -1.9317 | 2.1820  |
| 50 | H | 1.4781  | -2.8846 | 3.6708  |
| 51 | C | -1.1018 | -2.2856 | 4.3142  |
| 52 | H | -0.5496 | -3.0159 | 4.9231  |
| 53 | H | -2.1401 | -2.6221 | 4.2630  |
| 54 | H | -1.0756 | -1.3257 | 4.8460  |
| 55 | C | -2.8688 | -1.1276 | 1.4583  |
| 56 | H | -3.1943 | -0.1720 | 1.0264  |
| 57 | C | -2.9949 | -2.2104 | 0.3927  |
| 58 | H | -2.6016 | -3.1744 | 0.7470  |
| 59 | H | -2.4743 | -1.9455 | -0.5356 |
| 60 | H | -4.0587 | -2.3535 | 0.1512  |
| 61 | C | -3.7701 | -1.4287 | 2.6548  |
| 62 | H | -4.8146 | -1.2575 | 2.3579  |
| 63 | H | -3.5634 | -0.7966 | 3.5264  |
| 64 | H | -3.6867 | -2.4788 | 2.9616  |
| 65 | C | -3.3364 | 3.3676  | 3.3427  |
| 66 | H | -4.1238 | 3.9643  | 2.8596  |
| 67 | C | -3.8893 | 1.9883  | 3.6887  |
| 68 | H | -3.1298 | 1.3715  | 4.1898  |
| 69 | H | -4.2446 | 1.4448  | 2.8048  |
| 70 | H | -4.7382 | 2.0950  | 4.3793  |
| 71 | C | -2.8767 | 4.1043  | 4.6010  |
| 72 | H | -3.6626 | 4.0305  | 5.3662  |
| 73 | H | -2.6983 | 5.1696  | 4.4184  |
| 74 | H | -1.9600 | 3.6671  | 5.0219  |
| 75 | C | -1.3793 | 4.8875  | 1.6184  |
| 76 | H | -0.7562 | 4.6708  | 0.7416  |
| 77 | C | -2.5324 | 5.7782  | 1.1710  |
| 78 | H | -3.1980 | 6.0373  | 2.0062  |
| 79 | H | -3.1325 | 5.3060  | 0.3814  |

|     |   |         |         |         |
|-----|---|---------|---------|---------|
| 80  | H | -2.1284 | 6.7174  | 0.7654  |
| 81  | C | -0.4899 | 5.5557  | 2.6650  |
| 82  | H | 0.0768  | 6.3688  | 2.1896  |
| 83  | H | 0.2327  | 4.8583  | 3.1078  |
| 84  | H | -1.0743 | 5.9944  | 3.4820  |
| 85  | C | 2.8561  | 3.3614  | 2.8750  |
| 86  | H | 2.3059  | 4.2980  | 2.6987  |
| 87  | C | 4.3233  | 3.5956  | 2.5160  |
| 88  | H | 4.6916  | 4.4470  | 3.1067  |
| 89  | H | 4.4901  | 3.8335  | 1.4598  |
| 90  | H | 4.9487  | 2.7313  | 2.7670  |
| 91  | C | 2.7079  | 3.0140  | 4.3567  |
| 92  | H | 3.1175  | 2.0223  | 4.5917  |
| 93  | H | 1.6590  | 3.0386  | 4.6743  |
| 94  | H | 3.2565  | 3.7526  | 4.9589  |
| 95  | C | 3.0183  | 0.7695  | 1.2335  |
| 96  | H | 2.2971  | 0.0302  | 0.8586  |
| 97  | C | 3.9300  | 1.1558  | 0.0747  |
| 98  | H | 4.6963  | 1.8817  | 0.3727  |
| 99  | H | 3.3657  | 1.5764  | -0.7672 |
| 100 | H | 4.4463  | 0.2544  | -0.2875 |
| 101 | C | 3.7791  | 0.1266  | 2.3924  |
| 102 | H | 4.1923  | -0.8360 | 2.0591  |
| 103 | H | 3.1375  | -0.0707 | 3.2598  |
| 104 | H | 4.6191  | 0.7463  | 2.7278  |
| 105 | C | -0.2762 | 1.1997  | 5.8340  |
| 106 | N | -0.2740 | 1.3037  | 4.6837  |
| 107 | C | -0.2779 | 1.0682  | 7.2696  |
| 108 | H | 0.6649  | 1.4600  | 7.6741  |
| 109 | H | -0.3789 | 0.0093  | 7.5421  |
| 110 | H | -1.1175 | 1.6362  | 7.6913  |

/db/nbandeira/Fe(NPiso)/L=CO2/CO

Energy (POTENTIAL) = -113.00905754 Eh

|   | Atom | X      | Y      | Z      |
|---|------|--------|--------|--------|
| 1 | C    | 0.0000 | 0.0000 | 0.1860 |
| 2 | O    | 0.0000 | 0.0000 | 1.3140 |

/db/nbandeira/Fe(NPiso)/L=CO2/2e-/1-CO2H+2e-

Energy (POTENTIAL) = -4061.72421889 Eh

|    | Atom | X       | Y       | Z       |
|----|------|---------|---------|---------|
| 1  | Fe   | -0.0437 | -0.0063 | -0.3375 |
| 2  | P    | -0.7784 | -2.2322 | -0.6685 |
| 3  | P    | -1.6963 | 1.6984  | -0.6092 |
| 4  | P    | 2.0885  | 0.7422  | -0.9675 |
| 5  | N    | -0.2828 | -0.0134 | -2.5829 |
| 6  | C    | 0.2732  | -1.2760 | -3.0505 |
| 7  | C    | 0.9979  | -1.3570 | -4.2383 |
| 8  | H    | 1.2064  | -0.4602 | -4.8172 |
| 9  | C    | 1.4625  | -2.5896 | -4.6919 |
| 10 | H    | 2.0426  | -2.6301 | -5.6144 |
| 11 | C    | 1.1845  | -3.7695 | -3.9951 |
| 12 | C    | 0.4557  | -3.6667 | -2.8048 |
| 13 | H    | 0.2458  | -4.5778 | -2.2448 |
| 14 | C    | 0.0200  | -2.4369 | -2.3064 |
| 15 | C    | 1.6372  | -5.1054 | -4.5102 |
| 16 | H    | 0.8869  | -5.5324 | -5.1935 |
| 17 | H    | 1.7816  | -5.8227 | -3.6922 |
| 18 | H    | 2.5776  | -5.0204 | -5.0698 |
| 19 | C    | -1.7142 | 0.0762  | -2.8543 |
| 20 | C    | -2.2944 | -0.6395 | -3.8997 |
| 21 | H    | -1.6882 | -1.3025 | -4.5135 |
| 22 | C    | -3.6589 | -0.5241 | -4.1561 |
| 23 | H    | -4.0981 | -1.1073 | -4.9661 |
| 24 | C    | -4.4673 | 0.3252  | -3.3955 |
| 25 | C    | -3.8637 | 1.0443  | -2.3562 |
| 26 | H    | -4.4923 | 1.6924  | -1.7462 |
| 27 | C    | -2.5028 | 0.9282  | -2.0642 |
| 28 | C    | -5.9315 | 0.4802  | -3.6898 |
| 29 | H    | -6.0984 | 1.3034  | -4.4016 |
| 30 | H    | -6.5009 | 0.7139  | -2.7811 |
| 31 | H    | -6.3484 | -0.4304 | -4.1385 |
| 32 | C    | 0.4262  | 1.1328  | -3.1399 |
| 33 | C    | -0.0620 | 1.7976  | -4.2652 |
| 34 | H    | -0.9869 | 1.4711  | -4.7355 |
| 35 | C    | 0.6150  | 2.8991  | -4.7792 |
| 36 | H    | 0.2066  | 3.4163  | -5.6480 |
| 37 | C    | 1.8022  | 3.3526  | -4.1943 |
| 38 | C    | 2.2828  | 2.6639  | -3.0759 |

|    |   |         |         |         |
|----|---|---------|---------|---------|
| 39 | H | 3.1949  | 3.0261  | -2.6066 |
| 40 | C | 1.6141  | 1.5614  | -2.5345 |
| 41 | C | 2.5439  | 4.5314  | -4.7550 |
| 42 | H | 3.2446  | 4.9504  | -4.0221 |
| 43 | H | 1.8529  | 5.3250  | -5.0687 |
| 44 | H | 3.1259  | 4.2375  | -5.6418 |
| 45 | C | -0.1202 | -3.6701 | 0.3249  |
| 46 | H | -0.5220 | -4.5791 | -0.1505 |
| 47 | C | 1.4072  | -3.7117 | 0.2968  |
| 48 | H | 1.8148  | -2.8333 | 0.8082  |
| 49 | H | 1.8262  | -3.7479 | -0.7152 |
| 50 | H | 1.7507  | -4.6084 | 0.8335  |
| 51 | C | -0.5902 | -3.6285 | 1.7815  |
| 52 | H | -0.1454 | -4.4792 | 2.3185  |
| 53 | H | -1.6746 | -3.7015 | 1.8943  |
| 54 | H | -0.2503 | -2.7111 | 2.2761  |
| 55 | C | -2.5897 | -2.6023 | -1.0155 |
| 56 | H | -2.9448 | -1.6603 | -1.4545 |
| 57 | C | -2.7906 | -3.7157 | -2.0376 |
| 58 | H | -2.3784 | -4.6721 | -1.6840 |
| 59 | H | -2.3325 | -3.4813 | -3.0060 |
| 60 | H | -3.8686 | -3.8620 | -2.2038 |
| 61 | C | -3.4124 | -2.8710 | 0.2427  |
| 62 | H | -4.4787 | -2.7593 | -0.0015 |
| 63 | H | -3.1834 | -2.1800 | 1.0625  |
| 64 | H | -3.2667 | -3.8981 | 0.6020  |
| 65 | C | -3.1004 | 1.9502  | 0.5829  |
| 66 | H | -3.8938 | 2.4847  | 0.0400  |
| 67 | C | -3.6226 | 0.5884  | 1.0287  |
| 68 | H | -2.8437 | 0.0458  | 1.5801  |
| 69 | H | -3.9465 | -0.0300 | 0.1822  |
| 70 | H | -4.4872 | 0.7211  | 1.6959  |
| 71 | C | -2.6870 | 2.7969  | 1.7860  |
| 72 | H | -3.5049 | 2.7939  | 2.5219  |
| 73 | H | -2.4968 | 3.8421  | 1.5170  |
| 74 | H | -1.7946 | 2.3793  | 2.2686  |
| 75 | C | -1.1884 | 3.3894  | -1.2230 |
| 76 | H | -0.5869 | 3.1424  | -2.1077 |
| 77 | C | -2.3582 | 4.2546  | -1.6758 |
| 78 | H | -3.0048 | 4.5438  | -0.8354 |
| 79 | H | -2.9760 | 3.7449  | -2.4277 |

|     |   |         |         |         |
|-----|---|---------|---------|---------|
| 80  | H | -1.9761 | 5.1802  | -2.1322 |
| 81  | C | -0.2724 | 4.1107  | -0.2349 |
| 82  | H | 0.2873  | 4.8983  | -0.7598 |
| 83  | H | 0.4564  | 3.4314  | 0.2246  |
| 84  | H | -0.8354 | 4.5896  | 0.5751  |
| 85  | C | 3.0345  | 2.0768  | -0.0527 |
| 86  | H | 2.5018  | 2.9850  | -0.3728 |
| 87  | C | 4.5114  | 2.2531  | -0.4084 |
| 88  | H | 4.8733  | 3.1838  | 0.0532  |
| 89  | H | 4.7019  | 2.3251  | -1.4848 |
| 90  | H | 5.1258  | 1.4357  | -0.0133 |
| 91  | C | 2.8605  | 1.9535  | 1.4598  |
| 92  | H | 3.3054  | 1.0289  | 1.8489  |
| 93  | H | 1.8041  | 1.9716  | 1.7534  |
| 94  | H | 3.3612  | 2.8019  | 1.9494  |
| 95  | C | 3.2327  | -0.6641 | -1.4384 |
| 96  | H | 2.5120  | -1.4361 | -1.7444 |
| 97  | C | 4.1534  | -0.3997 | -2.6236 |
| 98  | H | 4.9352  | 0.3328  | -2.3878 |
| 99  | H | 3.5998  | -0.0409 | -3.5009 |
| 100 | H | 4.6525  | -1.3389 | -2.9059 |
| 101 | C | 3.9789  | -1.1989 | -0.2168 |
| 102 | H | 4.3901  | -2.1918 | -0.4501 |
| 103 | H | 3.3197  | -1.2999 | 0.6533  |
| 104 | H | 4.8199  | -0.5535 | 0.0647  |
| 105 | C | 0.2083  | -0.0775 | 1.5396  |
| 106 | O | -0.4510 | 0.4458  | 2.4237  |
| 107 | O | 1.2846  | -0.8261 | 1.9170  |
| 108 | H | 1.3385  | -0.8023 | 2.8922  |

/db/nbandeira/Fe(NPiso)/NCMe\_substitution\_/0e-/1-Cl+NCMe

Energy (POTENTIAL) = -4456.35144525 Eh

| Atom | X       | Y       | Z       |
|------|---------|---------|---------|
| 1 Fe | 0.0152  | -0.1480 | 0.0423  |
| 2 P  | -0.8164 | -2.3365 | -0.7574 |
| 3 P  | -1.6608 | 1.5427  | -0.5172 |
| 4 P  | 2.1352  | 0.6044  | -1.0028 |
| 5 Cl | 0.0645  | -0.2370 | 2.3155  |
| 6 N  | -0.2985 | -0.0524 | -2.7111 |
| 7 C  | 0.2725  | -1.2972 | -3.1294 |
| 8 C  | 1.0265  | -1.3725 | -4.3036 |
| 9 H  | 1.1911  | -0.4734 | -4.8947 |
| 10 C | 1.5635  | -2.5844 | -4.7232 |
| 11 H | 2.1531  | -2.6172 | -5.6401 |
| 12 C | 1.3410  | -3.7609 | -3.9982 |
| 13 C | 0.5747  | -3.6728 | -2.8324 |
| 14 H | 0.3969  | -4.5862 | -2.2658 |
| 15 C | 0.0524  | -2.4600 | -2.3688 |
| 16 C | 1.9263  | -5.0707 | -4.4419 |
| 17 H | 1.9028  | -5.1683 | -5.5354 |
| 18 H | 1.3846  | -5.9193 | -4.0054 |
| 19 H | 2.9788  | -5.1538 | -4.1301 |
| 20 C | -1.7216 | 0.0384  | -2.8740 |
| 21 C | -2.3552 | -0.6340 | -3.9216 |
| 22 H | -1.7660 | -1.2492 | -4.5998 |
| 23 C | -3.7309 | -0.5332 | -4.0971 |
| 24 H | -4.2064 | -1.0805 | -4.9118 |
| 25 C | -4.5072 | 0.2665  | -3.2507 |
| 26 C | -3.8574 | 0.9414  | -2.2115 |
| 27 H | -4.4630 | 1.5499  | -1.5409 |
| 28 C | -2.4797 | 0.8307  | -1.9931 |
| 29 C | -5.9876 | 0.4082  | -3.4582 |
| 30 H | -6.2007 | 1.1265  | -4.2647 |
| 31 H | -6.4867 | 0.7714  | -2.5511 |
| 32 H | -6.4435 | -0.5482 | -3.7467 |
| 33 C | 0.4034  | 1.1248  | -3.1365 |
| 34 C | -0.0978 | 1.8927  | -4.1927 |
| 35 H | -1.0030 | 1.5723  | -4.7051 |
| 36 C | 0.5278  | 3.0729  | -4.5750 |
| 37 H | 0.1075  | 3.6599  | -5.3923 |
| 38 C | 1.6821  | 3.5162  | -3.9193 |

|    |   |         |         |         |
|----|---|---------|---------|---------|
| 39 | C | 2.1859  | 2.7271  | -2.8817 |
| 40 | H | 3.0733  | 3.0820  | -2.3647 |
| 41 | C | 1.5726  | 1.5359  | -2.4732 |
| 42 | C | 2.3625  | 4.7922  | -4.3237 |
| 43 | H | 3.1131  | 5.0975  | -3.5841 |
| 44 | H | 1.6380  | 5.6098  | -4.4390 |
| 45 | H | 2.8735  | 4.6733  | -5.2910 |
| 46 | C | -0.1318 | -3.7612 | 0.2336  |
| 47 | H | -0.3618 | -4.6889 | -0.3116 |
| 48 | C | 1.3811  | -3.5973 | 0.3659  |
| 49 | H | 1.6142  | -2.7082 | 0.9694  |
| 50 | H | 1.8981  | -3.5051 | -0.5963 |
| 51 | H | 1.7997  | -4.4687 | 0.8901  |
| 52 | C | -0.7442 | -3.8424 | 1.6338  |
| 53 | H | -0.1838 | -4.5867 | 2.2185  |
| 54 | H | -1.7923 | -4.1508 | 1.6323  |
| 55 | H | -0.6672 | -2.8796 | 2.1562  |
| 56 | C | -2.6084 | -2.7072 | -1.1752 |
| 57 | H | -2.9600 | -1.7506 | -1.5830 |
| 58 | C | -2.7505 | -3.7766 | -2.2525 |
| 59 | H | -2.3279 | -4.7384 | -1.9265 |
| 60 | H | -2.2652 | -3.4896 | -3.1932 |
| 61 | H | -3.8189 | -3.9367 | -2.4616 |
| 62 | C | -3.4736 | -3.0439 | 0.0379  |
| 63 | H | -4.5291 | -2.8999 | -0.2345 |
| 64 | H | -3.2677 | -2.4179 | 0.9133  |
| 65 | H | -3.3540 | -4.0946 | 0.3313  |
| 66 | C | -3.0363 | 1.7386  | 0.7197  |
| 67 | H | -3.8299 | 2.3302  | 0.2406  |
| 68 | C | -3.5844 | 0.3642  | 1.0901  |
| 69 | H | -2.8047 | -0.2513 | 1.5576  |
| 70 | H | -3.9740 | -0.1790 | 0.2205  |
| 71 | H | -4.4059 | 0.4736  | 1.8133  |
| 72 | C | -2.5631 | 2.4928  | 1.9624  |
| 73 | H | -3.3453 | 2.4381  | 2.7335  |
| 74 | H | -2.3790 | 3.5537  | 1.7601  |
| 75 | H | -1.6490 | 2.0511  | 2.3821  |
| 76 | C | -1.1428 | 3.2553  | -1.0483 |
| 77 | H | -0.5414 | 3.0474  | -1.9421 |
| 78 | C | -2.3111 | 4.1401  | -1.4659 |
| 79 | H | -2.9553 | 4.3992  | -0.6138 |

|     |   |         |         |         |
|-----|---|---------|---------|---------|
| 80  | H | -2.9314 | 3.6604  | -2.2353 |
| 81  | H | -1.9263 | 5.0807  | -1.8875 |
| 82  | C | -0.2263 | 3.9317  | -0.0297 |
| 83  | H | 0.3401  | 4.7338  | -0.5242 |
| 84  | H | 0.4972  | 3.2320  | 0.4093  |
| 85  | H | -0.7901 | 4.3858  | 0.7937  |
| 86  | C | 3.1577  | 1.8268  | -0.0228 |
| 87  | H | 2.5841  | 2.7578  | -0.1485 |
| 88  | C | 4.5918  | 2.0780  | -0.4903 |
| 89  | H | 4.9924  | 2.9387  | 0.0652  |
| 90  | H | 4.6825  | 2.3048  | -1.5581 |
| 91  | H | 5.2422  | 1.2222  | -0.2748 |
| 92  | C | 3.1375  | 1.4721  | 1.4642  |
| 93  | H | 3.6544  | 0.5235  | 1.6637  |
| 94  | H | 2.1166  | 1.3842  | 1.8540  |
| 95  | H | 3.6576  | 2.2591  | 2.0299  |
| 96  | C | 3.2347  | -0.7703 | -1.6411 |
| 97  | H | 2.5014  | -1.5164 | -1.9754 |
| 98  | C | 4.0955  | -0.3983 | -2.8426 |
| 99  | H | 4.8865  | 0.3157  | -2.5829 |
| 100 | H | 3.4981  | 0.0321  | -3.6564 |
| 101 | H | 4.5804  | -1.3069 | -3.2300 |
| 102 | C | 4.0442  | -1.4039 | -0.5106 |
| 103 | H | 4.4554  | -2.3629 | -0.8572 |
| 104 | H | 3.4339  | -1.6074 | 0.3780  |
| 105 | H | 4.8892  | -0.7756 | -0.2042 |
| 106 | C | -3.1163 | -1.4331 | 4.2702  |
| 107 | N | -3.4623 | -2.4429 | 3.8197  |
| 108 | C | -2.6756 | -0.1660 | 4.8224  |
| 109 | H | -1.7258 | 0.1225  | 4.3529  |
| 110 | H | -2.5339 | -0.2533 | 5.9073  |
| 111 | H | -3.4222 | 0.6126  | 4.6200  |

/db/nbandeira/Fe(NPiso)/L=CO2/2e-/1-CO+H2O

Energy (POTENTIAL) = -4062.22115560 Eh

| Atom | X       | Y       | Z       |
|------|---------|---------|---------|
| 1 Fe | -0.1389 | 0.0783  | -0.6130 |
| 2 P  | -0.8217 | -2.1666 | -0.6362 |
| 3 P  | -1.7425 | 1.7653  | -0.7483 |
| 4 P  | 2.0551  | 0.7531  | -1.0618 |
| 5 N  | -0.3386 | -0.0422 | -2.6467 |
| 6 C  | 0.2178  | -1.3353 | -3.0643 |
| 7 C  | 0.9157  | -1.4712 | -4.2594 |
| 8 H  | 1.1038  | -0.6076 | -4.8931 |
| 9 C  | 1.3766  | -2.7266 | -4.6505 |
| 10 H | 1.9338  | -2.8168 | -5.5830 |
| 11 C | 1.1276  | -3.8673 | -3.8806 |
| 12 C | 0.4272  | -3.7060 | -2.6792 |
| 13 H | 0.2352  | -4.5845 | -2.0633 |
| 14 C | -0.0105 | -2.4527 | -2.2488 |
| 15 C | 1.5780  | -5.2264 | -4.3284 |
| 16 H | 0.7545  | -5.7579 | -4.8294 |
| 17 H | 1.8951  | -5.8434 | -3.4778 |
| 18 H | 2.4094  | -5.1569 | -5.0405 |
| 19 C | -1.7828 | 0.0398  | -2.9142 |
| 20 C | -2.3675 | -0.7090 | -3.9299 |
| 21 H | -1.7673 | -1.3884 | -4.5315 |
| 22 C | -3.7353 | -0.5998 | -4.1709 |
| 23 H | -4.1822 | -1.2045 | -4.9601 |
| 24 C | -4.5404 | 0.2639  | -3.4209 |
| 25 C | -3.9314 | 1.0121  | -2.4057 |
| 26 H | -4.5530 | 1.6714  | -1.8003 |
| 27 C | -2.5653 | 0.9101  | -2.1378 |
| 28 C | -6.0072 | 0.4016  | -3.7031 |
| 29 H | -6.1792 | 1.1790  | -4.4633 |
| 30 H | -6.5628 | 0.6932  | -2.8031 |
| 31 H | -6.4293 | -0.5345 | -4.0896 |
| 32 C | 0.3849  | 1.0820  | -3.2522 |
| 33 C | -0.0960 | 1.7011  | -4.4026 |
| 34 H | -1.0237 | 1.3673  | -4.8622 |
| 35 C | 0.6007  | 2.7712  | -4.9560 |
| 36 H | 0.2038  | 3.2577  | -5.8471 |
| 37 C | 1.7904  | 3.2349  | -4.3832 |
| 38 C | 2.2577  | 2.5929  | -3.2313 |

|    |   |         |         |         |
|----|---|---------|---------|---------|
| 39 | H | 3.1701  | 2.9657  | -2.7708 |
| 40 | C | 1.5730  | 1.5201  | -2.6533 |
| 41 | C | 2.5482  | 4.3788  | -4.9899 |
| 42 | H | 3.2543  | 4.8172  | -4.2742 |
| 43 | H | 1.8672  | 5.1666  | -5.3374 |
| 44 | H | 3.1248  | 4.0376  | -5.8629 |
| 45 | C | -0.1172 | -3.4389 | 0.5224  |
| 46 | H | -0.5579 | -4.3935 | 0.1932  |
| 47 | C | 1.4038  | -3.5103 | 0.4317  |
| 48 | H | 1.8454  | -2.5579 | 0.7473  |
| 49 | H | 1.7807  | -3.7480 | -0.5687 |
| 50 | H | 1.7650  | -4.2864 | 1.1216  |
| 51 | C | -0.5120 | -3.1783 | 1.9793  |
| 52 | H | -0.2759 | -4.0752 | 2.5691  |
| 53 | H | -1.5720 | -2.9556 | 2.1269  |
| 54 | H | 0.0741  | -2.3523 | 2.3984  |
| 55 | C | -2.6283 | -2.5850 | -0.9300 |
| 56 | H | -3.0377 | -1.6598 | -1.3582 |
| 57 | C | -2.7961 | -3.7080 | -1.9494 |
| 58 | H | -2.3457 | -4.6476 | -1.5985 |
| 59 | H | -2.3646 | -3.4605 | -2.9261 |
| 60 | H | -3.8712 | -3.8885 | -2.0950 |
| 61 | C | -3.3940 | -2.9041 | 0.3507  |
| 62 | H | -4.4627 | -2.9742 | 0.1033  |
| 63 | H | -3.2832 | -2.1350 | 1.1228  |
| 64 | H | -3.0882 | -3.8721 | 0.7692  |
| 65 | C | -3.0406 | 1.9870  | 0.5517  |
| 66 | H | -3.8575 | 2.5468  | 0.0718  |
| 67 | C | -3.5662 | 0.6301  | 1.0069  |
| 68 | H | -2.7800 | 0.0407  | 1.4971  |
| 69 | H | -3.9755 | 0.0403  | 0.1778  |
| 70 | H | -4.3728 | 0.7811  | 1.7382  |
| 71 | C | -2.5183 | 2.8083  | 1.7305  |
| 72 | H | -3.2717 | 2.7951  | 2.5304  |
| 73 | H | -2.3435 | 3.8557  | 1.4629  |
| 74 | H | -1.5882 | 2.3960  | 2.1452  |
| 75 | C | -1.2485 | 3.4319  | -1.4148 |
| 76 | H | -0.6677 | 3.1613  | -2.3070 |
| 77 | C | -2.4527 | 4.2541  | -1.8608 |
| 78 | H | -3.0817 | 4.5500  | -1.0099 |
| 79 | H | -3.0758 | 3.7166  | -2.5877 |

|     |   |         |         |         |
|-----|---|---------|---------|---------|
| 80  | H | -2.0959 | 5.1745  | -2.3455 |
| 81  | C | -0.3284 | 4.2055  | -0.4713 |
| 82  | H | 0.2234  | 4.9598  | -1.0491 |
| 83  | H | 0.4063  | 3.5599  | 0.0236  |
| 84  | H | -0.8909 | 4.7324  | 0.3082  |
| 85  | C | 2.9486  | 2.1134  | -0.1475 |
| 86  | H | 2.4230  | 3.0068  | -0.5159 |
| 87  | C | 4.4335  | 2.2712  | -0.4805 |
| 88  | H | 4.7724  | 3.2376  | -0.0808 |
| 89  | H | 4.6513  | 2.2661  | -1.5544 |
| 90  | H | 5.0412  | 1.4919  | -0.0076 |
| 91  | C | 2.7306  | 2.0351  | 1.3617  |
| 92  | H | 3.0792  | 1.0875  | 1.7925  |
| 93  | H | 1.6761  | 2.1695  | 1.6289  |
| 94  | H | 3.2949  | 2.8479  | 1.8412  |
| 95  | C | 3.1717  | -0.6955 | -1.4381 |
| 96  | H | 2.4466  | -1.4901 | -1.6667 |
| 97  | C | 4.0535  | -0.5050 | -2.6672 |
| 98  | H | 4.8100  | 0.2758  | -2.5185 |
| 99  | H | 3.4668  | -0.2529 | -3.5594 |
| 100 | H | 4.5813  | -1.4483 | -2.8707 |
| 101 | C | 3.9662  | -1.1262 | -0.2047 |
| 102 | H | 4.3079  | -2.1611 | -0.3465 |
| 103 | H | 3.3859  | -1.0911 | 0.7260  |
| 104 | H | 4.8574  | -0.5038 | -0.0656 |
| 105 | C | -0.0109 | 0.1580  | 1.1224  |
| 106 | O | 0.0554  | 0.2116  | 2.2679  |
| 107 | O | 2.7796  | -1.0252 | 3.2440  |
| 108 | H | 1.8984  | -0.6649 | 3.0834  |
| 109 | H | 2.7304  | -1.9420 | 2.9455  |

/db/nbandeira/Fe(NPiso)/L=NCMe/1e-/1-NCMe

Energy (POTENTIAL) = -4005.40462845962793 Eh

|    | Atom | X       | Y       | Z       |
|----|------|---------|---------|---------|
| 1  | Fe   | -0.3137 | 1.4546  | 2.7779  |
| 2  | P    | -1.0402 | -0.6723 | 1.9323  |
| 3  | P    | -1.8674 | 3.0954  | 2.1277  |
| 4  | P    | 1.7838  | 2.1132  | 1.8312  |
| 5  | N    | -0.5076 | 1.5360  | -0.1092 |
| 6  | C    | 0.0712  | 0.2857  | -0.4677 |
| 7  | C    | 0.8639  | 0.1822  | -1.6149 |
| 8  | H    | 1.0363  | 1.0680  | -2.2244 |
| 9  | C    | 1.4261  | -1.0351 | -1.9855 |
| 10 | H    | 2.0451  | -1.0892 | -2.8820 |
| 11 | C    | 1.1874  | -2.1912 | -1.2347 |
| 12 | C    | 0.3826  | -2.0751 | -0.0960 |
| 13 | H    | 0.1958  | -2.9757 | 0.4882  |
| 14 | C    | -0.1599 | -0.8557 | 0.3242  |
| 15 | C    | 1.7979  | -3.5108 | -1.6138 |
| 16 | H    | 1.9647  | -3.5789 | -2.6968 |
| 17 | H    | 1.1599  | -4.3503 | -1.3080 |
| 18 | H    | 2.7742  | -3.6472 | -1.1234 |
| 19 | C    | -1.9183 | 1.6547  | -0.2808 |
| 20 | C    | -2.5514 | 1.0014  | -1.3431 |
| 21 | H    | -1.9567 | 0.3944  | -2.0246 |
| 22 | C    | -3.9243 | 1.1147  | -1.5311 |
| 23 | H    | -4.3973 | 0.5861  | -2.3600 |
| 24 | C    | -4.7001 | 1.9102  | -0.6793 |
| 25 | C    | -4.0515 | 2.5677  | 0.3716  |
| 26 | H    | -4.6587 | 3.1760  | 1.0414  |
| 27 | C    | -2.6768 | 2.4417  | 0.6080  |
| 28 | C    | -6.1828 | 2.0441  | -0.8830 |
| 29 | H    | -6.4120 | 2.4552  | -1.8769 |
| 30 | H    | -6.6315 | 2.7052  | -0.1310 |
| 31 | H    | -6.6824 | 1.0666  | -0.8167 |
| 32 | C    | 0.2421  | 2.7004  | -0.4469 |
| 33 | C    | -0.1717 | 3.5046  | -1.5152 |
| 34 | H    | -1.0503 | 3.2141  | -2.0894 |
| 35 | C    | 0.5068  | 4.6747  | -1.8338 |
| 36 | H    | 0.1559  | 5.2903  | -2.6632 |
| 37 | C    | 1.6332  | 5.0652  | -1.1003 |
| 38 | C    | 2.0442  | 4.2428  | -0.0470 |

|    |   |         |         |         |
|----|---|---------|---------|---------|
| 39 | H | 2.9094  | 4.5634  | 0.5268  |
| 40 | C | 1.3714  | 3.0663  | 0.3085  |
| 41 | C | 2.3818  | 6.3232  | -1.4387 |
| 42 | H | 3.1214  | 6.5682  | -0.6661 |
| 43 | H | 1.6991  | 7.1778  | -1.5447 |
| 44 | H | 2.9175  | 6.2181  | -2.3941 |
| 45 | C | -0.4263 | -2.1440 | 2.9161  |
| 46 | H | -0.6628 | -3.0634 | 2.3596  |
| 47 | C | 1.0842  | -2.0249 | 3.1026  |
| 48 | H | 1.3162  | -1.1515 | 3.7276  |
| 49 | H | 1.6331  | -1.9203 | 2.1598  |
| 50 | H | 1.4685  | -2.9165 | 3.6202  |
| 51 | C | -1.0800 | -2.2267 | 4.2980  |
| 52 | H | -0.5426 | -2.9717 | 4.9038  |
| 53 | H | -2.1291 | -2.5308 | 4.2637  |
| 54 | H | -1.0182 | -1.2654 | 4.8250  |
| 55 | C | -2.8186 | -1.0758 | 1.4465  |
| 56 | H | -3.1587 | -0.1269 | 1.0110  |
| 57 | C | -2.9346 | -2.1592 | 0.3803  |
| 58 | H | -2.5129 | -3.1152 | 0.7252  |
| 59 | H | -2.4297 | -1.8814 | -0.5528 |
| 60 | H | -3.9970 | -2.3317 | 0.1478  |
| 61 | C | -3.7340 | -1.3957 | 2.6275  |
| 62 | H | -4.7790 | -1.2333 | 2.3252  |
| 63 | H | -3.5421 | -0.7720 | 3.5080  |
| 64 | H | -3.6440 | -2.4480 | 2.9270  |
| 65 | C | -3.2886 | 3.3253  | 3.3160  |
| 66 | H | -4.0640 | 3.9379  | 2.8338  |
| 67 | C | -3.8727 | 1.9626  | 3.6717  |
| 68 | H | -3.1187 | 1.3364  | 4.1692  |
| 69 | H | -4.2338 | 1.4201  | 2.7895  |
| 70 | H | -4.7204 | 2.0837  | 4.3630  |
| 71 | C | -2.8227 | 4.0501  | 4.5788  |
| 72 | H | -3.6091 | 3.9910  | 5.3459  |
| 73 | H | -2.6206 | 5.1122  | 4.4009  |
| 74 | H | -1.9141 | 3.5928  | 4.9969  |
| 75 | C | -1.3623 | 4.8272  | 1.6146  |
| 76 | H | -0.7499 | 4.6288  | 0.7256  |
| 77 | C | -2.5259 | 5.7160  | 1.1934  |
| 78 | H | -3.1779 | 5.9677  | 2.0422  |
| 79 | H | -3.1416 | 5.2417  | 0.4170  |

|     |   |         |         |         |
|-----|---|---------|---------|---------|
| 80  | H | -2.1425 | 6.6623  | 0.7820  |
| 81  | C | -0.4586 | 5.5036  | 2.6438  |
| 82  | H | 0.1124  | 6.3118  | 2.1636  |
| 83  | H | 0.2602  | 4.8003  | 3.0837  |
| 84  | H | -1.0314 | 5.9502  | 3.4656  |
| 85  | C | 2.7820  | 3.3511  | 2.8421  |
| 86  | H | 2.2456  | 4.2919  | 2.6484  |
| 87  | C | 4.2556  | 3.5782  | 2.5013  |
| 88  | H | 4.6209  | 4.4428  | 3.0759  |
| 89  | H | 4.4414  | 3.7884  | 1.4424  |
| 90  | H | 4.8773  | 2.7197  | 2.7812  |
| 91  | C | 2.6273  | 3.0431  | 4.3316  |
| 92  | H | 3.0562  | 2.0657  | 4.5936  |
| 93  | H | 1.5741  | 3.0408  | 4.6359  |
| 94  | H | 3.1524  | 3.8072  | 4.9247  |
| 95  | C | 2.9584  | 0.7699  | 1.2393  |
| 96  | H | 2.2562  | 0.0138  | 0.8616  |
| 97  | C | 3.8819  | 1.1492  | 0.0875  |
| 98  | H | 4.6336  | 1.8913  | 0.3835  |
| 99  | H | 3.3223  | 1.5516  | -0.7665 |
| 100 | H | 4.4183  | 0.2525  | -0.2597 |
| 101 | C | 3.7194  | 0.1435  | 2.4070  |
| 102 | H | 4.1297  | -0.8296 | 2.0992  |
| 103 | H | 3.0783  | -0.0298 | 3.2797  |
| 104 | H | 4.5627  | 0.7656  | 2.7302  |
| 105 | C | -0.2714 | 1.1877  | 5.9147  |
| 106 | N | -0.2696 | 1.2909  | 4.7604  |
| 107 | C | -0.2755 | 1.0570  | 7.3553  |
| 108 | H | 0.6576  | 1.4598  | 7.7709  |
| 109 | H | -0.3635 | -0.0013 | 7.6351  |
| 110 | H | -1.1233 | 1.6107  | 7.7801  |

/db/nbandeira/Fe(NPiso)/L=NCMe/2e-/1-NCMe

Energy (POTENTIAL) = -4005.45348021416612 Eh

| Atom | X       | Y       | Z       |
|------|---------|---------|---------|
| 1 Fe | -0.3176 | 1.4435  | 2.7499  |
| 2 P  | -1.0008 | -0.6870 | 1.9222  |
| 3 P  | -1.8694 | 3.1042  | 2.0930  |
| 4 P  | 1.7712  | 2.0842  | 1.8158  |
| 5 N  | -0.5115 | 1.5073  | -0.1284 |
| 6 C  | 0.0772  | 0.2695  | -0.4827 |
| 7 C  | 0.8601  | 0.1727  | -1.6394 |
| 8 H  | 1.0110  | 1.0596  | -2.2529 |
| 9 C  | 1.4441  | -1.0409 | -2.0091 |
| 10 H | 2.0581  | -1.0886 | -2.9100 |
| 11 C | 1.2362  | -2.1939 | -1.2524 |
| 12 C | 0.4396  | -2.0861 | -0.0993 |
| 13 H | 0.2856  | -2.9848 | 0.4978  |
| 14 C | -0.1262 | -0.8773 | 0.3140  |
| 15 C | 1.8370  | -3.5165 | -1.6395 |
| 16 H | 2.4762  | -3.4206 | -2.5267 |
| 17 H | 1.0575  | -4.2597 | -1.8659 |
| 18 H | 2.4482  | -3.9327 | -0.8250 |
| 19 C | -1.9285 | 1.6053  | -0.2790 |
| 20 C | -2.5754 | 0.9017  | -1.2825 |
| 21 H | -1.9812 | 0.2623  | -1.9377 |
| 22 C | -3.9717 | 0.9886  | -1.4647 |
| 23 H | -4.4641 | 0.4129  | -2.2494 |
| 24 C | -4.7180 | 1.8900  | -0.6493 |
| 25 C | -4.0651 | 2.6140  | 0.3310  |
| 26 H | -4.6596 | 3.2988  | 0.9393  |
| 27 C | -2.6600 | 2.4770  | 0.6061  |
| 28 C | -6.1976 | 2.0447  | -0.8726 |
| 29 H | -6.4211 | 2.3944  | -1.8942 |
| 30 H | -6.6413 | 2.7615  | -0.1679 |
| 31 H | -6.7248 | 1.0840  | -0.7530 |
| 32 C | 0.2266  | 2.6788  | -0.4536 |
| 33 C | -0.2118 | 3.5028  | -1.4973 |
| 34 H | -1.0982 | 3.2025  | -2.0553 |
| 35 C | 0.4490  | 4.6856  | -1.8041 |
| 36 H | 0.0810  | 5.3140  | -2.6169 |
| 37 C | 1.5801  | 5.0767  | -1.0766 |
| 38 C | 2.0114  | 4.2410  | -0.0421 |
| 39 H | 2.8766  | 4.5643  | 0.5305  |
| 40 C | 1.3564  | 3.0496  | 0.2994  |

|    |   |         |         |         |
|----|---|---------|---------|---------|
| 41 | C | 2.3076  | 6.3524  | -1.3980 |
| 42 | H | 3.0673  | 6.5808  | -0.6395 |
| 43 | H | 1.6158  | 7.2047  | -1.4561 |
| 44 | H | 2.8170  | 6.2851  | -2.3714 |
| 45 | C | -0.3832 | -2.1571 | 2.9092  |
| 46 | H | -0.6046 | -3.0781 | 2.3489  |
| 47 | C | 1.1238  | -2.0290 | 3.1126  |
| 48 | H | 1.3437  | -1.1502 | 3.7348  |
| 49 | H | 1.6781  | -1.9228 | 2.1731  |
| 50 | H | 1.5110  | -2.9157 | 3.6373  |
| 51 | C | -1.0535 | -2.2479 | 4.2822  |
| 52 | H | -0.5235 | -2.9934 | 4.8944  |
| 53 | H | -2.1017 | -2.5538 | 4.2314  |
| 54 | H | -1.0022 | -1.2872 | 4.8124  |
| 55 | C | -2.7764 | -1.1012 | 1.4483  |
| 56 | H | -3.0896 | -0.1715 | 0.9549  |
| 57 | C | -2.8969 | -2.2363 | 0.4387  |
| 58 | H | -2.5176 | -3.1862 | 0.8456  |
| 59 | H | -2.3550 | -2.0208 | -0.4898 |
| 60 | H | -3.9568 | -2.3876 | 0.1800  |
| 61 | C | -3.7089 | -1.3450 | 2.6344  |
| 62 | H | -4.7474 | -1.1591 | 2.3217  |
| 63 | H | -3.4998 | -0.6931 | 3.4903  |
| 64 | H | -3.6580 | -2.3866 | 2.9781  |
| 65 | C | -3.2801 | 3.3748  | 3.2984  |
| 66 | H | -4.0366 | 4.0008  | 2.8016  |
| 67 | C | -3.9094 | 2.0317  | 3.6455  |
| 68 | H | -3.1776 | 1.3834  | 4.1484  |
| 69 | H | -4.2687 | 1.5078  | 2.7510  |
| 70 | H | -4.7632 | 2.1703  | 4.3278  |
| 71 | C | -2.8275 | 4.0932  | 4.5685  |
| 72 | H | -3.6310 | 4.0631  | 5.3210  |
| 73 | H | -2.5894 | 5.1478  | 4.3907  |
| 74 | H | -1.9410 | 3.6139  | 5.0090  |
| 75 | C | -1.3101 | 4.8628  | 1.6715  |
| 76 | H | -0.6884 | 4.6671  | 0.7878  |
| 77 | C | -2.4484 | 5.7789  | 1.2428  |
| 78 | H | -3.1013 | 6.0444  | 2.0878  |
| 79 | H | -3.0689 | 5.3032  | 0.4699  |
| 80 | H | -2.0553 | 6.7199  | 0.8251  |
| 81 | C | -0.4063 | 5.4977  | 2.7249  |
| 82 | H | 0.2277  | 6.2747  | 2.2705  |
| 83 | H | 0.2575  | 4.7538  | 3.1883  |

|     |   |         |         |         |
|-----|---|---------|---------|---------|
| 84  | H | -0.9777 | 5.9757  | 3.5308  |
| 85  | C | 2.7869  | 3.3176  | 2.8229  |
| 86  | H | 2.2351  | 4.2545  | 2.6545  |
| 87  | C | 4.2524  | 3.5684  | 2.4633  |
| 88  | H | 4.6178  | 4.4304  | 3.0425  |
| 89  | H | 4.4207  | 3.7923  | 1.4043  |
| 90  | H | 4.8885  | 2.7140  | 2.7235  |
| 91  | C | 2.6651  | 2.9876  | 4.3109  |
| 92  | H | 3.1281  | 2.0204  | 4.5531  |
| 93  | H | 1.6166  | 2.9438  | 4.6279  |
| 94  | H | 3.1751  | 3.7593  | 4.9080  |
| 95  | C | 2.9631  | 0.7575  | 1.2086  |
| 96  | H | 2.2679  | -0.0044 | 0.8295  |
| 97  | C | 3.8740  | 1.1545  | 0.0525  |
| 98  | H | 4.6190  | 1.9039  | 0.3474  |
| 99  | H | 3.3015  | 1.5562  | -0.7932 |
| 100 | H | 4.4193  | 0.2673  | -0.3063 |
| 101 | C | 3.7441  | 0.1307  | 2.3626  |
| 102 | H | 4.1666  | -0.8339 | 2.0430  |
| 103 | H | 3.1138  | -0.0599 | 3.2396  |
| 104 | H | 4.5814  | 0.7616  | 2.6852  |
| 105 | C | -0.3649 | 1.2178  | 5.8775  |
| 106 | N | -0.3106 | 1.3086  | 4.7208  |
| 107 | C | -0.4392 | 1.1072  | 7.3191  |
| 108 | H | 0.5106  | 1.4183  | 7.7748  |
| 109 | H | -0.6477 | 0.0682  | 7.6083  |
| 110 | H | -1.2430 | 1.7493  | 7.7037  |
